# Supplementary material
Source: MDPI journal article supplement (https://www.mdpi.com/2304-6740/4/4/41)

# checkCIF/PLATON report

Structure factors have been supplied for datablock(s) C\_\_Crystal\_Vrac\_79\_3\_ZnBrN3H8

THIS REPORT IS FOR GUIDANCE ONLY. IF USED AS PART OF A REVIEW PROCEDURE FOR PUBLICATION, IT SHOULD NOT REPLACE THE EXPERTISE OF AN EXPERIENCED CRYSTALLOGRAPHIC REFEREE.

No syntax errors found.      CIF dictionary      Interpreting this report

## Datablock: C\_\_Crystal\_Vrac\_79\_3\_ZnBrN3H8

---

Bond precision:    Zn- N = 0.0220 A                      Wavelength=0.71073

Cell:                      a=7.6055(4)              b=5.9772(4)              c=12.5722(8)  
                            alpha=90              beta=93.475(4)              gamma=90  
Temperature:              298 K

|                | Calculated        | Reported       |
|----------------|-------------------|----------------|
| Volume         | 570.48(6)         | 570.48(6)      |
| Space group    | P 21/n            | P 21/n         |
| Hall group     | -P 2yn            | -P 2yn         |
| Moiety formula | H16 N6 Zn2, 2(Br) | ?              |
| Sum formula    | Br2 H16 N6 Zn2    | B2R H16 N6 Zn2 |
| Mr             | 390.77            | 390.77         |
| Dx,g cm-3      | 2.275             | 2.275          |
| Z              | 2                 | 2              |
| Mu (mm-1)      | 11.165            | 11.165         |
| F000           | 376.0             | 376.0          |
| F000'          | 376.22            |                |
| h,k,lmax       | 9,7,16            | 9,7,16         |
| Nref           | 1312              | 1298           |
| Tmin,Tmax      |                   |                |
| Tmin'          |                   |                |

Correction method= Not given

Data completeness= 0.989                      Theta(max)= 27.491

R(reflections)= 0.0344( 1085)              wR2(reflections)= 0.0864( 1298)

S = 1.047                      Npar= 71

---

The following ALERTS were generated. Each ALERT has the format  
**test-name\_ALERT\_alert-type\_alert-level.**  
Click on the hyperlinks for more details of the test.

---

## Alert level A

EXPT005\_ALERT\_1\_A \_exptl\_crystal\_description is missing  
Crystal habit description.  
The following tests will not be performed.  
CRYSR\_01

DIFF003\_ALERT\_1\_A \_diffrn\_measurement\_device\_type is missing  
Diffractometer make and type. Replaces \_diffrn\_measurement\_type.

ABSMU01\_ALERT\_1\_A The ratio of given/expected absorption coefficient lies  
outside the range 0.90 <> 1.10  
Calculated value of mu = 4.158  
Value of mu given = 11.165

CHEMW01\_ALERT\_1\_A The ratio of given/expected molecular weight as calculated  
from the \_chemical\_formula\_sum lies outside  
the range 0.90 <> 1.10  
Calculated formula weight = 252.5466  
Formula weight given = 390.7700

SHFSU01\_ALERT\_2\_A The absolute value of parameter shift to su ratio > 0.20  
Absolute value of the parameter shift to su ratio given 1.140  
Additional refinement cycles may be required.

PLAT029\_ALERT\_3\_A \_diffrn\_measured\_fraction\_theta\_full value Low . 0.573 Note  
PLAT080\_ALERT\_2\_A Maximum Shift/Error ..... 1.14 Why ?  
PLAT183\_ALERT\_1\_A Missing \_cell\_measurement\_reflns\_used value .... Please Do !  
PLAT184\_ALERT\_1\_A Missing \_cell\_measurement\_theta\_min value ..... Please Do !  
PLAT185\_ALERT\_1\_A Missing \_cell\_measurement\_theta\_max value ..... Please Do !  
PLAT211\_ALERT\_2\_A ADP of Atom N2 is N.P.D. or (nearly) 2D ... Please Check

---

## Alert level B

PLAT031\_ALERT\_4\_B Refined Extinction Parameter within Range ..... 1.923 Sigma  
PLAT911\_ALERT\_3\_B Missing # FCF Refl Between THmin & STh/L= 0.600 440 Report

---

## Alert level C

PLAT041\_ALERT\_1\_C Calc. and Reported SumFormula Strings Differ Please Check  
PLAT052\_ALERT\_1\_C Info on Absorption Correction Method Not Given Please Do !  
PLAT053\_ALERT\_1\_C Minimum Crystal Dimension Missing (or Error) ... Please Check  
PLAT054\_ALERT\_1\_C Medium Crystal Dimension Missing (or Error) ... Please Check  
PLAT055\_ALERT\_1\_C Maximum Crystal Dimension Missing (or Error) ... Please Check  
PLAT213\_ALERT\_2\_C Atom N1 has ADP max/min Ratio ..... 3.3 prolat  
PLAT420\_ALERT\_2\_C D-H Without Acceptor N3 -- H3B ... Please Check

---

## Alert level G

FORMU01\_ALERT\_2\_G There is a discrepancy between the atom counts in the  
\_chemical\_formula\_sum and the formula from the \_atom\_site\* data.  
Atom count from \_chemical\_formula\_sum: H16 B2 N6 Zn2  
Atom count from the \_atom\_site data: H16 Br2 N6 Zn2

CELLZ01\_ALERT\_1\_G Difference between formula and atom\_site contents detected.  
CELLZ01\_ALERT\_1\_G ALERT: Large difference may be due to a  
symmetry error - see SYMMG tests  
From the CIF: \_cell\_formula\_units\_Z 2  
From the CIF: \_chemical\_formula\_sum B2r H16 N6 Zn2  
TEST: Compare cell contents of formula and atom\_site data  
WARNING: Unexpected atom type is in site list: Br  
WARNING: Formula and atom\_type\_symbol element names mismatch.

| atom | Z*formula | cif sites | diff |
|------|-----------|-----------|------|
| B    | 4.00      | 0.00      | 4.00 |
| r    | 2.00      | 0.00      | 2.00 |
| H    | 32.00     | 32.00     | 0.00 |
| N    | 12.00     | 12.00     | 0.00 |

|                                                    |                                                  |      |      |              |
|----------------------------------------------------|--------------------------------------------------|------|------|--------------|
| Zn                                                 | 4.00                                             | 4.00 | 0.00 |              |
| WARNING: Site labels do not match formula elements |                                                  |      |      |              |
| PLAT002_ALERT_2_G                                  | Number of Distance or Angle Restraints on AtSite |      | 11   | Note         |
| PLAT004_ALERT_5_G                                  | Polymeric Structure Found with Maximum Dimension |      | 2    | Info         |
| PLAT172_ALERT_4_G                                  | The CIF-Embedded .res File Contains DFIX Records |      | 8    | Report       |
| PLAT860_ALERT_3_G                                  | Number of Least-Squares Restraints .....         |      | 8    | Note         |
| PLAT870_ALERT_4_G                                  | ALERTS Related to Twinning Effects Suppressed .. |      | !    | Info         |
| PLAT912_ALERT_4_G                                  | Missing # of FCF Reflections Above STh/L= 0.600  |      | 122  | Note         |
| PLAT961_ALERT_5_G                                  | Dataset Contains no Negative Intensities .....   |      |      | Please Check |

- 
- 11 **ALERT level A** = Most likely a serious problem - resolve or explain  
 2 **ALERT level B** = A potentially serious problem, consider carefully  
 7 **ALERT level C** = Check. Ensure it is not caused by an omission or oversight  
 10 **ALERT level G** = General information/check it is not something unexpected
- 14 ALERT type 1 CIF construction/syntax error, inconsistent or missing data  
 7 ALERT type 2 Indicator that the structure model may be wrong or deficient  
 3 ALERT type 3 Indicator that the structure quality may be low  
 4 ALERT type 4 Improvement, methodology, query or suggestion  
 2 ALERT type 5 Informative message, check
- 

It is advisable to attempt to resolve as many as possible of the alerts in all categories. Often the minor alerts point to easily fixed oversights, errors and omissions in your CIF or refinement strategy, so attention to these fine details can be worthwhile. In order to resolve some of the more serious problems it may be necessary to carry out additional measurements or structure refinements. However, the purpose of your study may justify the reported deviations and the more serious of these should normally be commented upon in the discussion or experimental section of a paper or in the "special\_details" fields of the CIF. checkCIF was carefully designed to identify outliers and unusual parameters, but every test has its limitations and alerts that are not important in a particular case may appear. Conversely, the absence of alerts does not guarantee there are no aspects of the results needing attention. It is up to the individual to critically assess their own results and, if necessary, seek expert advice.

### Publication of your CIF in IUCr journals

A basic structural check has been run on your CIF. These basic checks will be run on all CIFs submitted for publication in IUCr journals (*Acta Crystallographica*, *Journal of Applied Crystallography*, *Journal of Synchrotron Radiation*); however, if you intend to submit to *Acta Crystallographica Section C* or *E* or *IUCrData*, you should make sure that full publication checks are run on the final version of your CIF prior to submission.

### Publication of your CIF in other journals

Please refer to the *Notes for Authors* of the relevant journal for any special instructions relating to CIF submission.

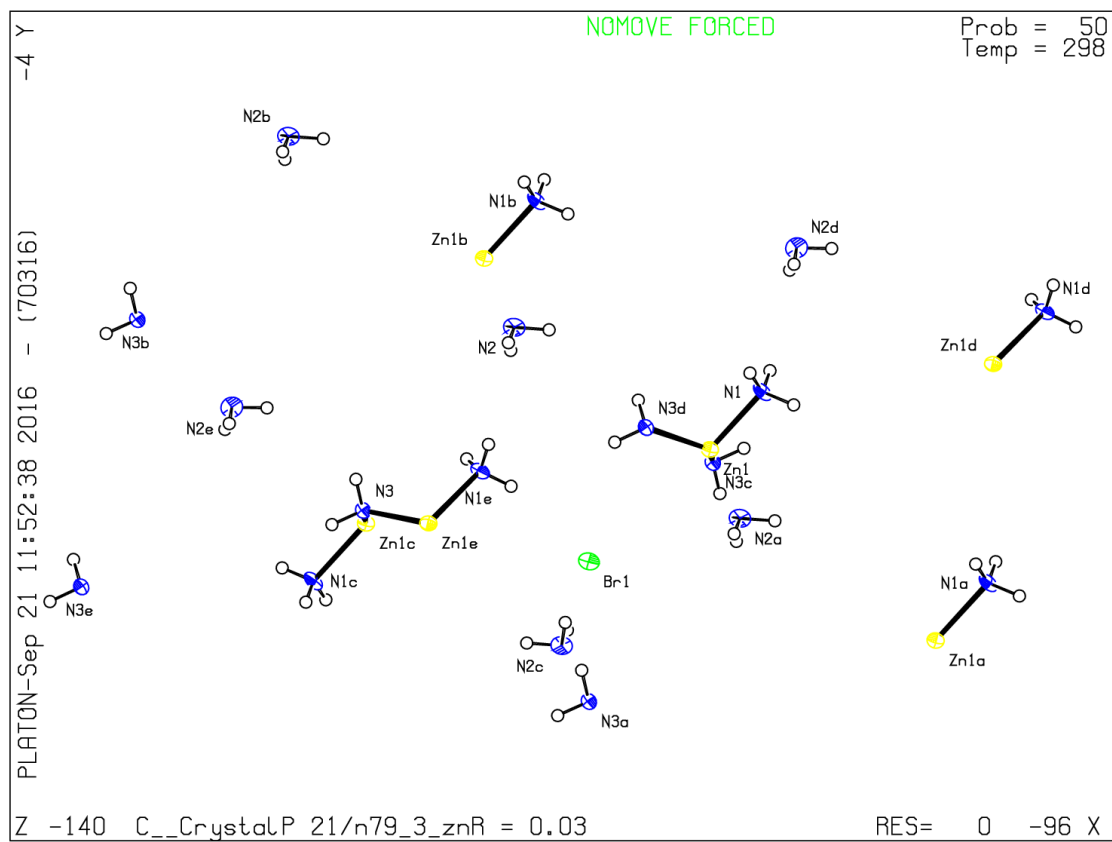

Supplement: s1 [file s1]
