# Supplementary material
Source: MDPI journal article supplement (https://www.mdpi.com/2304-6740/4/4/41)

# checkCIF/PLATON report

Structure factors have been supplied for datablock(s) C\_\_Crystal\_VRAC\_131hot\_asym\_trsep14s

THIS REPORT IS FOR GUIDANCE ONLY. IF USED AS PART OF A REVIEW PROCEDURE FOR PUBLICATION, IT SHOULD NOT REPLACE THE EXPERTISE OF AN EXPERIENCED CRYSTALLOGRAPHIC REFEREE.

No syntax errors found.      CIF dictionary      Interpreting this report

## Datablock: C\_\_Crystal\_VRAC\_131hot\_asym\_trsep14s

---

Bond precision:    Zn- N = 0.0062 A                      Wavelength=0.71073

Cell:                      a=5.7715(4)              b=10.2359(4)              c=6.5456(6)  
                            alpha=90              beta=90              gamma=90  
Temperature:              298 K

|                | Calculated         | Reported        |
|----------------|--------------------|-----------------|
| Volume         | 386.69(5)          | 386.69(5)       |
| Space group    | P 21 21 2          | P 21 21 2       |
| Hall group     | P 2 2ab            | P 2 2ab         |
| Moiety formula | H24 N10 Zn4, 2(Cl) | ?               |
| Sum formula    | Cl2 H24 N10 Zn4    | H24 Cl2 N10 Zn4 |
| Mr             | 496.75             | 496.75          |
| Dx,g cm-3      | 2.133              | 2.133           |
| Z              | 1                  | 1               |
| Mu (mm-1)      | 6.467              | 6.467           |
| F000           | 248.0              | 248.0           |
| F000'          | 249.45             |                 |
| h,k,lmax       | 7,13,8             | 7,12,8          |
| Nref           | 844[ 522]          | 844             |
| Tmin,Tmax      |                    |                 |
| Tmin'          |                    |                 |

Correction method= Not given

Data completeness= 1.62/1.00                      Theta(max)= 26.972

R(reflections)= 0.0380( 744)                      wR2(reflections)= 0.0983( 844)

S = 1.021                      Npar= 58

---

The following ALERTS were generated. Each ALERT has the format  
**test-name\_ALERT\_alert-type\_alert-level.**  
Click on the hyperlinks for more details of the test.

---

## Alert level A

EXPT005\_ALERT\_1\_A \_exptl\_crystal\_description is missing  
Crystal habit description.  
The following tests will not be performed.  
CRYSR\_01

DIFF003\_ALERT\_1\_A \_diffrn\_measurement\_device\_type is missing  
Diffractometer make and type. Replaces \_diffrn\_measurement\_type.

PLAT183\_ALERT\_1\_A Missing \_cell\_measurement\_reflns\_used value .... Please Do !  
PLAT184\_ALERT\_1\_A Missing \_cell\_measurement\_theta\_min value ..... Please Do !  
PLAT185\_ALERT\_1\_A Missing \_cell\_measurement\_theta\_max value ..... Please Do !

---

## Alert level B

CHEMS01\_ALERT\_1\_B The sum formula contains elements in the wrong order.  
H precedes Cl  
Sequence must be alphabetical for inorganic structures.

PLAT927\_ALERT\_1\_B Reported and Calculated wR2 Differ by ..... 0.0060 Check  
PLAT987\_ALERT\_1\_B The Flack x is >> 0 - Do a BASF/TWIN Refinement Please Check

---

## Alert level C

SHFSU01\_ALERT\_2\_C The absolute value of parameter shift to su ratio > 0.05  
Absolute value of the parameter shift to su ratio given 0.055  
Additional refinement cycles may be required.

STRVA01\_ALERT\_4\_C Flack test results are ambiguous.  
From the CIF: \_refine\_ls\_abs\_structure\_Flack 0.490  
From the CIF: \_refine\_ls\_abs\_structure\_Flack\_su 0.030

PLAT031\_ALERT\_4\_C Refined Extinction Parameter within Range ..... 2.833 Sigma  
PLAT041\_ALERT\_1\_C Calc. and Reported SumFormula Strings Differ Please Check  
PLAT052\_ALERT\_1\_C Info on Absorption Correction Method Not Given Please Do !  
PLAT053\_ALERT\_1\_C Minimum Crystal Dimension Missing (or Error) ... Please Check  
PLAT054\_ALERT\_1\_C Medium Crystal Dimension Missing (or Error) ... Please Check  
PLAT055\_ALERT\_1\_C Maximum Crystal Dimension Missing (or Error) ... Please Check  
PLAT094\_ALERT\_2\_C Ratio of Maximum / Minimum Residual Density .... 2.20 Report  
PLAT420\_ALERT\_2\_C D-H Without Acceptor N1 -- H1A ... Please Check  
PLAT420\_ALERT\_2\_C D-H Without Acceptor N1 -- H1B ... Please Check  
PLAT420\_ALERT\_2\_C D-H Without Acceptor N3 -- H3A ... Please Check  
PLAT790\_ALERT\_4\_C Centre of Gravity not Within Unit Cell: Resd. # 1 Note  
H24 N10 Zn4

PLAT926\_ALERT\_1\_C Reported and Calculated R1 Differ by ..... 0.0015 Check

---

## Alert level G

PLAT002\_ALERT\_2\_G Number of Distance or Angle Restraints on AtSite 9 Note  
PLAT004\_ALERT\_5\_G Polymeric Structure Found with Maximum Dimension 1 Info  
PLAT033\_ALERT\_4\_G Flack x Value Deviates > 3.0 \* sigma from Zero . 0.490 Note  
PLAT172\_ALERT\_4\_G The CIF-Embedded .res File Contains DFIX Records 6 Report  
PLAT860\_ALERT\_3\_G Number of Least-Squares Restraints ..... 6 Note  
PLAT961\_ALERT\_5\_G Dataset Contains no Negative Intensities ..... Please Check

- 
- 5 **ALERT level A** = Most likely a serious problem - resolve or explain  
3 **ALERT level B** = A potentially serious problem, consider carefully  
14 **ALERT level C** = Check. Ensure it is not caused by an omission or oversight  
6 **ALERT level G** = General information/check it is not something unexpected

- 14 ALERT type 1 CIF construction/syntax error, inconsistent or missing data  
6 ALERT type 2 Indicator that the structure model may be wrong or deficient  
1 ALERT type 3 Indicator that the structure quality may be low  
5 ALERT type 4 Improvement, methodology, query or suggestion  
2 ALERT type 5 Informative message, check

---

It is advisable to attempt to resolve as many as possible of the alerts in all categories. Often the minor alerts point to easily fixed oversights, errors and omissions in your CIF or refinement strategy, so attention to these fine details can be worthwhile. In order to resolve some of the more serious problems it may be necessary to carry out additional measurements or structure refinements. However, the purpose of your study may justify the reported deviations and the more serious of these should normally be commented upon in the discussion or experimental section of a paper or in the "special\_details" fields of the CIF. checkCIF was carefully designed to identify outliers and unusual parameters, but every test has its limitations and alerts that are not important in a particular case may appear. Conversely, the absence of alerts does not guarantee there are no aspects of the results needing attention. It is up to the individual to critically assess their own results and, if necessary, seek expert advice.

### **Publication of your CIF in IUCr journals**

A basic structural check has been run on your CIF. These basic checks will be run on all CIFs submitted for publication in IUCr journals (*Acta Crystallographica*, *Journal of Applied Crystallography*, *Journal of Synchrotron Radiation*); however, if you intend to submit to *Acta Crystallographica Section C* or *E* or *IUCrData*, you should make sure that full publication checks are run on the final version of your CIF prior to submission.

### **Publication of your CIF in other journals**

Please refer to the *Notes for Authors* of the relevant journal for any special instructions relating to CIF submission.

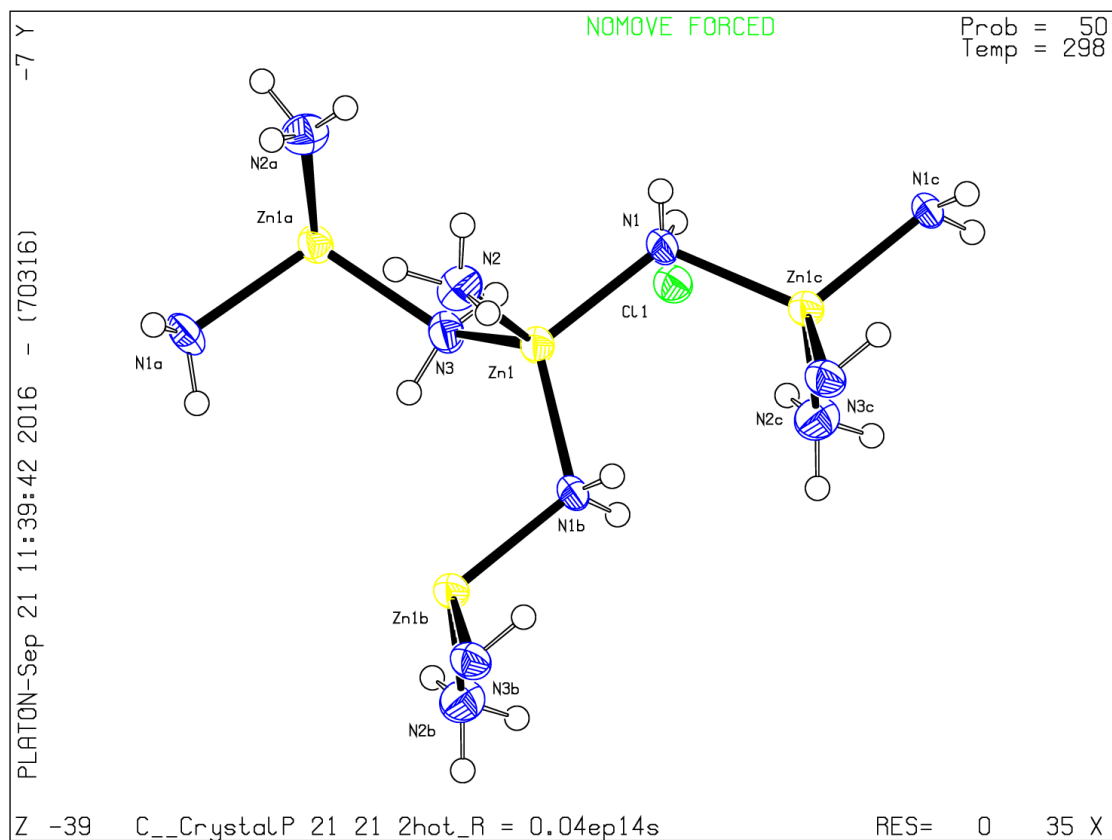

Supplement: s1 [file s1]
