# Supplementary material
Source: MDPI journal article supplement (https://www.mdpi.com/2304-6740/4/4/41)
Supplement: s1 [file s1]

Archive with 5 entries (4 files):
- inorganics-04-00041-supplementary file/
- inorganics-04-00041-supplementary file/Zn2ClN5H12.cif
- inorganics-04-00041-supplementary file/Zn2ClN5H12.pdf
- inorganics-04-00041-supplementary file/ZnBrN3H8.cif
- inorganics-04-00041-supplementary file/ZnBrN3H8.pdf
