# Supplementary material
Source: MDPI journal article supplement (https://www.mdpi.com/2304-6740/4/4/41)
Supplement: s1 [file s1 › inorganics-04-00041-supplementary file/Zn2ClN5H12.cif]

 
data_C:\Crystal\VRAC\131hot\asym\trsep14s
 
_audit_creation_method            SHELXL-2013
_chemical_name_systematic
;
 ?
;
_chemical_name_common             ?
_chemical_melting_point           ?
_chemical_formula_moiety          ?
_chemical_formula_sum
 'H12 Cl N5 Zn2' 
_chemical_formula_weight          248.34

loop_
 _atom_type_symbol
 _atom_type_description
 _atom_type_scat_dispersion_real
 _atom_type_scat_dispersion_imag
 _atom_type_scat_source
 'Zn'  'Zn'   0.2839   1.4301
 'International Tables Vol C Tables 4.2.6.8 and 6.1.1.4'
 'Cl'  'Cl'   0.1484   0.1585
 'International Tables Vol C Tables 4.2.6.8 and 6.1.1.4'
 'N'  'N'   0.0061   0.0033
 'International Tables Vol C Tables 4.2.6.8 and 6.1.1.4'
 'H'  'H'   0.0000   0.0000
 'International Tables Vol C Tables 4.2.6.8 and 6.1.1.4'
 
_space_group_crystal_system       orthorhombic
_space_group_IT_number            18
_space_group_name_H-M_alt         'P 21 21 2'
_space_group_name_Hall            'P 2 2ab'
 
_shelx_space_group_comment
;
The symmetry employed for this shelxl refinement is uniquely defined
by the following loop, which should always be used as a source of
symmetry information in preference to the above space-group names.
They are only intended as comments.
;
 
loop_
 _space_group_symop_operation_xyz
 'x, y, z'
 '-x, -y, z'
 'x+1/2, -y+1/2, -z'
 '-x+1/2, y+1/2, -z'
 
_cell_length_a                    5.7715(4)
_cell_length_b                    10.2359(4)
_cell_length_c                    6.5456(6)
_cell_angle_alpha                 90
_cell_angle_beta                  90
_cell_angle_gamma                 90
_cell_volume                      386.69(5)
_cell_formula_units_Z             4
_cell_measurement_temperature     298(2)
_cell_measurement_reflns_used     ? 
_cell_measurement_theta_min       ? 
_cell_measurement_theta_max       ? 
 
_exptl_crystal_description        ? 
_exptl_crystal_colour             ? 
_exptl_crystal_density_meas       ? 
_exptl_crystal_density_method     ?              
_exptl_crystal_density_diffrn     4.266          
_exptl_crystal_F_000              496
_exptl_transmission_factor_min    ?                                             
_exptl_transmission_factor_max    ?                                             
_exptl_crystal_size_max           ? 
_exptl_crystal_size_mid           ? 
_exptl_crystal_size_min           ? 
_exptl_absorpt_coefficient_mu     12.934
_shelx_estimated_absorpt_T_min    ? 
_shelx_estimated_absorpt_T_max    ? 
_exptl_absorpt_correction_type    ? 
_exptl_absorpt_correction_T_min   ? 
_exptl_absorpt_correction_T_max   ? 
_exptl_absorpt_process_details    ? 
 
_exptl_special_details
;
 ?
;
 
_diffrn_ambient_temperature       298(2)
_diffrn_radiation_wavelength      0.71073
_diffrn_radiation_type            MoK\a
_diffrn_source                    ?                       
_diffrn_measurement_device_type   ? 
_diffrn_measurement_method        ? 
_diffrn_detector_area_resol_mean  ? 
_diffrn_reflns_number             844
_diffrn_reflns_av_unetI/netI      0.0379
_diffrn_reflns_av_R_equivalents   ?
_diffrn_reflns_limit_h_min        -7
_diffrn_reflns_limit_h_max        7
_diffrn_reflns_limit_k_min        -12
_diffrn_reflns_limit_k_max        12
_diffrn_reflns_limit_l_min        -8
_diffrn_reflns_limit_l_max        8
_diffrn_reflns_theta_min          3.112
_diffrn_reflns_theta_max          26.972
_diffrn_reflns_theta_full         25.242
_diffrn_measured_fraction_theta_max   1.000
_diffrn_measured_fraction_theta_full  1.000
_diffrn_reflns_Laue_measured_fraction_max    1.000
_diffrn_reflns_Laue_measured_fraction_full   1.000
_diffrn_reflns_point_group_measured_fraction_max   1.000
_diffrn_reflns_point_group_measured_fraction_full  1.000
_reflns_number_total              844
_reflns_number_gt                 744
_reflns_threshold_expression      'I > 2\s(I)'
_reflns_Friedel_coverage          0.617
_reflns_Friedel_fraction_max      1.000
_reflns_Friedel_fraction_full     1.000
 
_reflns_special_details
;
 _reflns_Friedel_fraction is defined as the number of unique
 Friedel pairs measured divided by the number that would be
 possible theoretically, ignoring centric projections and
 systematic absences.
;
 
_computing_data_collection        ?
_computing_cell_refinement        ?
_computing_data_reduction         ?
_computing_structure_solution     ?
_computing_structure_refinement   'SHELXL-2013 (Sheldrick, 2013)'
_computing_molecular_graphics     ?
_computing_publication_material   ?
 
_refine_special_details
;
 ?
;
_refine_ls_structure_factor_coef  Fsqd
_refine_ls_matrix_type            full
_refine_ls_weighting_scheme       calc
_refine_ls_weighting_details
'w=1/[\s^2^(Fo^2^)+(0.0705P)^2^] where P=(Fo^2^+2Fc^2^)/3'
_atom_sites_solution_primary      ?
_atom_sites_solution_secondary    ?
_atom_sites_solution_hydrogens    difmap
_refine_ls_hydrogen_treatment     refxyz
_refine_ls_extinction_method      SHELXL
_refine_ls_extinction_coef        0.017(6)
_refine_ls_extinction_expression
 'Fc^*^=kFc[1+0.001xFc^2^\l^3^/sin(2\q)]^-1/4^'
_refine_ls_abs_structure_details
;
 Flack x determined using 272 quotients [(I+)-(I-)]/[(I+)+(I-)]
 (Parsons and Flack (2004), Acta Cryst. A60, s61).
;
_refine_ls_abs_structure_Flack    0.49(3)
_chemical_absolute_configuration  ?
_refine_ls_number_reflns          844
_refine_ls_number_parameters      58
_refine_ls_number_restraints      6
_refine_ls_R_factor_all           0.0439
_refine_ls_R_factor_gt            0.0380
_refine_ls_wR_factor_ref          0.0983
_refine_ls_wR_factor_gt           0.0963
_refine_ls_goodness_of_fit_ref    1.021
_refine_ls_restrained_S_all       1.018
_refine_ls_shift/su_max           0.055
_refine_ls_shift/su_mean          0.012
 
loop_
 _atom_site_label
 _atom_site_type_symbol
 _atom_site_fract_x
 _atom_site_fract_y
 _atom_site_fract_z
 _atom_site_U_iso_or_equiv
 _atom_site_adp_type
 _atom_site_occupancy
 _atom_site_site_symmetry_order  
 _atom_site_calc_flag
 _atom_site_refinement_flags_posn
 _atom_site_refinement_flags_adp
 _atom_site_refinement_flags_occupancy
 _atom_site_disorder_assembly
 _atom_site_disorder_group
Zn1 Zn 0.10087(15) 0.33764(8) 0.53735(14) 0.0235(3) Uani 1 1 d . . . . .
Cl1 Cl 0.5000 0.5000 0.0434(4) 0.0247(5) Uani 1 2 d S T P . .
N1 N 0.4487(10) 0.3291(7) 0.5531(13) 0.0281(14) Uani 1 1 d D . . . .
H1A H 0.522(16) 0.383(8) 0.469(12) 0.034 Uiso 1 1 d D U . . .
H1B H 0.509(17) 0.342(10) 0.676(8) 0.034 Uiso 1 1 d D U . . .
N2 N 0.0069(15) 0.3377(8) 0.8529(11) 0.0316(15) Uani 1 1 d D . . . .
H2A H 0.004(19) 0.259(5) 0.906(15) 0.038 Uiso 1 1 d D U . . .
H2B H 0.088(16) 0.361(10) 0.961(10) 0.038 Uiso 1 1 d D U . . .
H2C H -0.083(16) 0.382(9) 0.938(13) 0.038 Uiso 1 1 d D U . . .
N3 N 0.0000 0.5000 0.3954(16) 0.027(2) Uani 1 2 d DS T P . .
H3A H 0.144(7) 0.517(10) 0.352(13) 0.032 Uiso 1 1 d D U . . .
 
loop_
 _atom_site_aniso_label
 _atom_site_aniso_U_11
 _atom_site_aniso_U_22
 _atom_site_aniso_U_33
 _atom_site_aniso_U_23
 _atom_site_aniso_U_13
 _atom_site_aniso_U_12
Zn1 0.0195(4) 0.0198(5) 0.0311(5) -0.0017(4) 0.0006(4) 0.0009(4)
Cl1 0.0229(11) 0.0258(12) 0.0255(11) 0.000 0.000 -0.0012(10)
N1 0.014(3) 0.023(3) 0.047(4) -0.008(4) 0.002(3) -0.001(2)
N2 0.037(4) 0.029(4) 0.029(4) 0.000(3) 0.005(3) -0.002(4)
N3 0.022(4) 0.027(5) 0.031(5) 0.000 0.000 0.004(4)
 
_geom_special_details
;
 All esds (except the esd in the dihedral angle between two l.s. planes)
 are estimated using the full covariance matrix.  The cell esds are taken
 into account individually in the estimation of esds in distances, angles
 and torsion angles; correlations between esds in cell parameters are only
 used when they are defined by crystal symmetry.  An approximate (isotropic)
 treatment of cell esds is used for estimating esds involving l.s. planes.
;
 
loop_
 _geom_bond_atom_site_label_1
 _geom_bond_atom_site_label_2
 _geom_bond_distance
 _geom_bond_site_symmetry_2
 _geom_bond_publ_flag
Zn1 N3 1.991(5) . ?
Zn1 N1 2.009(7) 3_456 ?
Zn1 N1 2.012(6) . ?
Zn1 N2 2.135(7) . ?
N1 Zn1 2.009(7) 3_556 ?
N1 H1A 0.88(3) . ?
N1 H1B 0.89(3) . ?
N2 H2A 0.88(3) . ?
N2 H2B 0.88(3) . ?
N2 H2C 0.89(3) . ?
N3 Zn1 1.991(5) 2_565 ?
N3 H3A 0.90(3) . ?
 
loop_
 _geom_angle_atom_site_label_1
 _geom_angle_atom_site_label_2
 _geom_angle_atom_site_label_3
 _geom_angle
 _geom_angle_site_symmetry_1
 _geom_angle_site_symmetry_3
 _geom_angle_publ_flag
N3 Zn1 N1 116.4(3) . 3_456 ?
N3 Zn1 N1 110.6(2) . . ?
N1 Zn1 N1 114.48(19) 3_456 . ?
N3 Zn1 N2 112.1(3) . . ?
N1 Zn1 N2 100.1(3) 3_456 . ?
N1 Zn1 N2 101.8(3) . . ?
Zn1 N1 Zn1 117.2(3) 3_556 . ?
Zn1 N1 H1A 98(7) 3_556 . ?
Zn1 N1 H1A 115(7) . . ?
Zn1 N1 H1B 103(7) 3_556 . ?
Zn1 N1 H1B 115(7) . . ?
H1A N1 H1B 107(9) . . ?
Zn1 N2 H2A 113(7) . . ?
Zn1 N2 H2B 130(7) . . ?
H2A N2 H2B 87(9) . . ?
Zn1 N2 H2C 139(7) . . ?
H2A N2 H2C 102(10) . . ?
H2B N2 H2C 71(8) . . ?
Zn1 N3 Zn1 124.4(5) 2_565 . ?
Zn1 N3 H3A 105(6) 2_565 . ?
Zn1 N3 H3A 92(6) . . ?
 
_refine_diff_density_max    1.194
_refine_diff_density_min   -0.542
_refine_diff_density_rms    0.185

_shelxl_version_number 2013-4

_shelx_res_file
;
TITL
CELL  0.71073  5.77150 10.23590  6.54560 90.00000 90.00000 90.00000
ZERR 4  0.00040  0.00040  0.00060  0.00000  0.00000  0.00000
LATT -1
SYMM -X, -Y, Z
SYMM X+ 0.50000, -Y+ 0.50000, -Z
SYMM -X+ 0.50000, Y+ 0.50000, -Z
SFAC ZN CL N H
UNIT 8 4 20 48
TEMP 25
PLAN 30
FMAP 2
L.S. 2
BOND $H
DFIX 0.89 N1 H1A
DFIX 0.89 N1 H1B
DFIX 0.89 N2 H2A
DFIX 0.89 N2 H2B
DFIX 0.89 N2 H2C
DFIX 0.89 N3 H3A
ACTA
OMIT 0 54
WGHT    0.070500
EXTI    0.017060
BASF   0.30000
FVAR       0.81956
ZN1   1    0.100866    0.337638    0.537354    11.00000    0.01952    0.01978 =
         0.03115   -0.00168    0.00059    0.00086
CL1   2    0.500000    0.500000    0.043420    10.50000    0.02294    0.02576 =
         0.02546    0.00000    0.00000   -0.00120
N1    3    0.448725    0.329107    0.553139    11.00000    0.01418    0.02277 =
         0.04737   -0.00846    0.00175   -0.00057
H1A   4    0.521519    0.382616    0.468990    11.00000   -1.20000
H1B   4    0.508604    0.341717    0.676216    11.00000   -1.20000
N2    3    0.006908    0.337721    0.852899    11.00000    0.03702    0.02899 =
         0.02864   -0.00045    0.00536   -0.00220
H2A   4    0.004274    0.258512    0.906246    11.00000   -1.20000
H2B   4    0.087983    0.361045    0.961301    11.00000   -1.20000
H2C   4   -0.083019    0.381943    0.938006    11.00000   -1.20000
N3    3    0.000000    0.500000    0.395437    10.50000    0.02208    0.02716 =
         0.03092    0.00000    0.00000    0.00407
H3A   4    0.144380    0.516522    0.352385    11.00000   -1.20000
HKLF 4

REM
REM R1 =  0.0380 for     744 Fo > 4sig(Fo)  and  0.0439 for all     844 data
REM     58 parameters refined using      6 restraints

END

WGHT      0.0705      0.0000

REM Highest difference peak  1.194,  deepest hole -0.542,  1-sigma level  0.185
Q1    1   0.5000  0.5000 -0.1516  10.50000  0.05    0.65
Q2    1   0.7346  0.5125  0.0109  11.00000  0.05    0.63
Q3    1  -0.1076  0.3393  0.5392  11.00000  0.05    0.58
Q4    1   0.0000  0.5000  1.0421  10.50000  0.05    0.50
Q5    1  -0.0709  0.1520  0.9376  11.00000  0.05    0.46
Q6    1   0.0278  0.3286  0.8001  11.00000  0.05    0.45
Q7    1   0.5000  0.5000  0.7449  10.50000  0.05    0.43
Q8    1   0.4190  0.2600  0.5279  11.00000  0.05    0.41
Q9    1  -0.1387  0.3445  0.8489  11.00000  0.05    0.34
Q10   1   0.3953  0.3449  0.8628  11.00000  0.05    0.34
Q11   1  -0.0145  0.4209  0.4688  11.00000  0.05    0.31
Q12   1   0.0089  0.3203  0.9630  11.00000  0.05    0.31
Q13   1   0.1327  0.3789  0.8750  11.00000  0.05    0.30
Q14   1   0.2315  0.4209  0.4806  11.00000  0.05    0.30
Q15   1  -0.2366  0.3275  0.7845  11.00000  0.05    0.30
Q16   1   0.0831  0.3369  1.2175  11.00000  0.05    0.28
Q17   1  -0.3178  0.3995  0.9650  11.00000  0.05    0.28
Q18   1  -0.0840  0.3069  1.0920  11.00000  0.05    0.28
Q19   1   0.5637  0.3816  0.1684  11.00000  0.05    0.26
Q20   1   0.2128  0.3315  0.9669  11.00000  0.05    0.26
Q21   1   0.0337  0.3320  0.3439  11.00000  0.05    0.25
Q22   1   0.0364  0.2856  1.0301  11.00000  0.05    0.25
Q23   1   0.0410  0.4172  0.5893  11.00000  0.05    0.25
Q24   1   0.1129  0.2596  0.5420  11.00000  0.05    0.24
Q25   1   0.5078  0.3448  0.7762  11.00000  0.05    0.24
Q26   1  -0.2052  0.3288  1.1252  11.00000  0.05    0.24
Q27   1  -0.2518  0.5073  0.7361  11.00000  0.05    0.24
Q28   1   0.1443  0.3833  1.0615  11.00000  0.05    0.23
Q29   1  -0.0971  0.5117  0.8495  11.00000  0.05    0.22
Q30   1   0.0958  0.4977  0.2442  11.00000  0.05    0.22
;
_shelx_res_checksum   84874

_shelx_hkl_file
;
   2   0   0 7414.19  190.97   0
   4   0   0  327.74   18.06   0
   6   0   0  203.87   15.48   0
   1   1   0  526.45   10.32   0
   2   1   0 3065.80   49.03   0
   3   1   0  510.97   12.90   0
   4   1   0  400.00   15.48   0
   5   1   0  745.81   20.65   0
   6   1   0  366.45   15.48   0
   7   1   0   20.65   10.32   0
   0   2   0  521.29   15.48   0
   1   2   0 2575.48   46.45   0
   2   2   0    2.58    5.16   0
   3   2   0 3615.48   59.35   0
   4   2   0  905.81   23.23   0
   5   2   0   12.90    7.74   0
   6   2   0  379.35   15.48   0
   7   2   0  265.81   15.48   0
   1   3   0 5956.12   85.16   0
   2   3   0   30.97    5.16   0
   3   3   0   61.94    7.74   0
   4   3   0   12.90    7.74   0
   5   3   0  745.81   20.65   0
   6   3   0   10.32   10.32   0
   7   3   0   12.90   12.90   0
   0   4   0 1143.22   28.39   0
   1   4   0 1576.77   28.39   0
   2   4   0    0.00    5.16   0
   3   4   0 2601.29   41.29   0
   4   4   0 1060.64   25.81   0
   5   4   0   23.23    7.74   0
   6   4   0  394.84   18.06   0
   7   4   0  154.84   20.65   0
   1   5   0   61.94    5.16   0
   2   5   0 2508.38   41.29   0
   3   5   0  201.29    7.74   0
   4   5   0  345.81   12.90   0
   5   5   0  276.13   12.90   0
   6   5   0  273.55   15.48   0
   7   5   0    2.58   18.06   0
   0   6   0 9809.02  183.23   0
   1   6   0   28.39    5.16   0
   2   6   0 1938.06   36.13   0
   3   6   0   46.45    5.16   0
   4   6   0  216.77   10.32   0
   5   6   0    5.16    5.16   0
   6   6   0  144.52   12.90   0
   1   7   0  384.52   12.90   0
   2   7   0  887.74   20.65   0
   3   7   0  229.68   10.32   0
   4   7   0  154.84    7.74   0
   5   7   0  464.52   15.48   0
   6   7   0  147.10   15.48   0
   0   8   0   36.13   10.32   0
   1   8   0  750.97   18.06   0
   2   8   0   25.81    7.74   0
   3   8   0 1259.35   28.39   0
   4   8   0  193.55   10.32   0
   5   8   0   -7.74   12.90   0
   6   8   0   67.10   18.06   0
   1   9   0 1520.00   33.55   0
   2   9   0   64.52   10.32   0
   3   9   0   15.48   10.32   0
   4   9   0   15.48    7.74   0
   5   9   0  255.48   15.48   0
   0  10   0  397.42   23.23   0
   1  10   0  263.23   15.48   0
   2  10   0    7.74   10.32   0
   3  10   0  446.45   18.06   0
   4  10   0  394.84   18.06   0
   5  10   0    5.16   12.90   0
   1  11   0   15.48   12.90   0
   2  11   0  598.71   25.81   0
   3  11   0   30.97   15.48   0
   4  11   0   82.58   12.90   0
   0  12   0 1556.13   59.35   0
   1  12   0   20.65   12.90   0
   2  12   0  314.84   20.65   0
   3  12   0   15.48   20.65   0
   1  13   0  129.03   23.23   0
   2  13   0  100.65   23.23   0
   0   0  -1 3132.90   95.48   0
   1   0  -1  694.19   15.48   0
   2   0  -1  116.13    7.74   0
   3   0  -1    2.58    5.16   0
   4   0  -1 2531.61   46.45   0
   5   0  -1   30.97   10.32   0
   6   0  -1 1016.77   25.81   0
   7   0  -1    7.74   10.32   0
   0   1  -1   82.58    2.58   0
  -1  -1   1 2686.45   54.19   0
   1   1  -1 2655.48   43.87   0
  -2  -1   1 2477.42   43.87   0
   2   1  -1 2557.42   46.45   0
  -3  -1   1  227.10    7.74   0
   3   1  -1  221.94   10.32   0
  -4  -1   1  348.39   12.90   0
   4   1  -1  376.77   15.48   0
  -5  -1   1  103.23   10.32   0
   5   1  -1  116.13   10.32   0
  -6  -1   1  374.19   12.90   0
   6   1  -1  350.97   15.48   0
  -7  -1   1   25.81   10.32   0
   7   1  -1   12.90   10.32   0
   0   2  -1 3396.13   67.10   0
  -1  -2   1 2188.39   38.71   0
   1   2  -1 2110.97   38.71   0
  -2  -2   1  691.61   15.48   0
   2   2  -1  647.74   15.48   0
  -3  -2   1 2972.90   49.03   0
   3   2  -1 2766.45   59.35   0
  -4  -2   1  121.29    7.74   0
   4   2  -1  116.13   10.32   0
  -5  -2   1   20.65    7.74   0
   5   2  -1   12.90    7.74   0
  -6  -2   1   61.94   10.32   0
   6   2  -1   61.94   10.32   0
  -7  -2   1  268.39   15.48   0
   7   2  -1  260.64   18.06   0
   0   3  -1 2730.32   49.03   0
  -1  -3   1   74.84    5.16   0
   1   3  -1   82.58    5.16   0
  -2  -3   1  717.42   15.48   0
   2   3  -1  730.32   12.90   0
  -3  -3   1 1886.45   33.55   0
   3   3  -1 1907.09   43.87   0
  -4  -3   1   10.32    7.74   0
   4   3  -1   12.90    7.74   0
  -5  -3   1 2314.84   49.03   0
   5   3  -1 2381.93   54.19   0
  -6  -3   1   -7.74    5.16   0
   6   3  -1    2.58    7.74   0
  -7  -3   1   98.06   18.06   0
   7   3  -1  116.13   15.48   0
   0   4  -1 3127.74   56.77   0
  -1  -4   1 1403.87   28.39   0
   1   4  -1 1396.13   25.81   0
  -2  -4   1  629.68   12.90   0
   2   4  -1  655.48   12.90   0
  -3  -4   1 2046.45   38.71   0
   3   4  -1 2100.64   38.71   0
  -4  -4   1  180.64   10.32   0
   4   4  -1  201.29   10.32   0
  -5  -4   1   33.55    7.74   0
   5   4  -1   20.65    7.74   0
  -6  -4   1   82.58   12.90   0
   6   4  -1   98.06   10.32   0
  -7  -4   1  180.64   20.65   0
   7   4  -1  185.81   18.06   0
   0   5  -1   15.48    5.16   0
  -1  -5   1 1101.93   25.81   0
   1   5  -1 1081.29   18.06   0
  -2  -5   1 2136.77   38.71   0
   2   5  -1 2147.09   36.13   0
  -3  -5   1  157.42    7.74   0
   3   5  -1  162.58    7.74   0
  -4  -5   1  320.00   12.90   0
   4   5  -1  286.45   10.32   0
  -5  -5   1   28.39    7.74   0
   5   5  -1   18.06    7.74   0
  -6  -5   1  268.39   18.06   0
   6   5  -1  301.94   15.48   0
  -7  -5   1    5.16   20.65   0
   7   5  -1   25.81   18.06   0
   0   6  -1 2129.03   33.55   0
  -1  -6   1  221.94    7.74   0
   1   6  -1  234.84    7.74   0
  -2  -6   1   56.77    7.74   0
   2   6  -1   67.10    7.74   0
  -3  -6   1   30.97    5.16   0
   3   6  -1   38.71    7.74   0
  -4  -6   1 1362.58   30.97   0
   4   6  -1 1486.45   33.55   0
  -5  -6   1   15.48    7.74   0
   5   6  -1   15.48    7.74   0
  -6  -6   1  567.74   25.81   0
   6   6  -1  585.81   33.55   0
   0   7  -1   36.13    7.74   0
  -1  -7   1 1264.51   25.81   0
   1   7  -1 1290.32   28.39   0
  -2  -7   1  843.87   25.81   0
   2   7  -1  781.93   18.06   0
  -3  -7   1   74.84    7.74   0
   3   7  -1   85.16   10.32   0
  -4  -7   1  136.77    7.74   0
   4   7  -1  134.19   10.32   0
  -5  -7   1  141.94   12.90   0
   5   7  -1  129.03   15.48   0
  -6  -7   1  198.71   23.23   0
   6   7  -1  170.32   20.65   0
   0   8  -1  652.90   18.06   0
  -1  -8   1  534.19   18.06   0
   1   8  -1  498.06   15.48   0
  -2  -8   1  232.26   12.90   0
   2   8  -1  198.71   12.90   0
  -3  -8   1 1099.35   28.39   0
   3   8  -1 1125.16   28.39   0
  -4  -8   1   15.48    7.74   0
   4   8  -1    7.74    7.74   0
  -5  -8   1    7.74    7.74   0
   5   8  -1    5.16   10.32   0
  -6  -8   1   25.81   28.39   0
   6   8  -1   15.48   15.48   0
   0   9  -1  327.74   15.48   0
  -1  -9   1  185.81   10.32   0
   1   9  -1  170.32   10.32   0
  -2  -9   1  157.42   10.32   0
   2   9  -1  144.52   10.32   0
  -3  -9   1  451.61   15.48   0
   3   9  -1  436.13   15.48   0
  -4  -9   1    5.16    7.74   0
   4   9  -1   18.06    7.74   0
  -5  -9   1  789.68   33.55   0
   5   9  -1  794.84   30.97   0
   0  10  -1  975.48   28.39   0
  -1 -10   1  245.16   12.90   0
   1  10  -1  255.48   12.90   0
  -2 -10   1  105.81   12.90   0
   2  10  -1  129.03   12.90   0
  -3 -10   1  412.90   15.48   0
   3  10  -1  369.03   18.06   0
  -4 -10   1  116.13   10.32   0
   4  10  -1  103.23   12.90   0
  -5 -10   1    7.74   15.48   0
   5  10  -1    2.58   20.65   0
   0  11  -1   -5.16   15.48   0
  -1 -11   1  116.13   10.32   0
   1  11  -1  131.61   10.32   0
  -2 -11   1  567.74   20.65   0
   2  11  -1  544.52   23.23   0
  -3 -11   1   36.13    7.74   0
   3  11  -1   41.29   12.90   0
  -4 -11   1   56.77   12.90   0
   4  11  -1   85.16   18.06   0
   0  12  -1  505.81   23.23   0
  -1 -12   1   59.35   12.90   0
   1  12  -1   59.35   10.32   0
  -2 -12   1   18.06   10.32   0
   2  12  -1    0.00   15.48   0
  -3 -12   1   28.39   12.90   0
   3  12  -1   33.55   23.23   0
   0  13  -1   30.97   23.23   0
  -1 -13   1  263.23   28.39   0
   1  13  -1  273.55   30.97   0
   0   0  -2 9999.99  154.84   0
   1   0  -2  392.26    7.74   0
   2   0  -2 1600.00   33.55   0
   3   0  -2 1032.26   25.81   0
   4   0  -2  609.03   18.06   0
   5   0  -2  701.93   20.65   0
   6   0  -2  229.68   12.90   0
   7   0  -2   41.29   12.90   0
   0   1  -2  247.74    7.74   0
  -1  -1   2  402.58   10.32   0
   1   1  -2  418.06    7.74   0
  -2  -1   2 1920.00   59.35   0
   2   1  -2 1950.97   36.13   0
  -3  -1   2 1117.42   23.23   0
   3   1  -2 1112.26   23.23   0
  -4  -1   2  286.45   12.90   0
   4   1  -2  314.84   12.90   0
  -5  -1   2  580.64   18.06   0
   5   1  -2  596.13   18.06   0
  -6  -1   2  247.74   12.90   0
   6   1  -2  273.55   18.06   0
  -7  -1   2   64.52   15.48   0
   7   1  -2   85.16   12.90   0
   0   2  -2  270.97    7.74   0
  -1  -2   2 1762.58   33.55   0
   1   2  -2 1747.10   36.13   0
  -2  -2   2  474.84   12.90   0
   2   2  -2  480.00   10.32   0
  -3  -2   2 2126.45   43.87   0
   3   2  -2 2131.61   41.29   0
  -4  -2   2  678.71   18.06   0
   4   2  -2  691.61   20.65   0
  -5  -2   2   10.32    7.74   0
   5   2  -2   15.48   10.32   0
  -6  -2   2  350.97   15.48   0
   6   2  -2  353.55   18.06   0
  -7  -2   2  188.39   18.06   0
   7   2  -2  203.87   20.65   0
   0   3  -2  611.61   12.90   0
  -1  -3   2 2634.84   36.13   0
   1   3  -2 2756.13   51.61   0
  -2  -3   2   30.97    5.16   0
   2   3  -2   28.39    5.16   0
  -3  -3   2  129.03   10.32   0
   3   3  -2  123.87    7.74   0
  -4  -3   2  531.61   15.48   0
   4   3  -2  508.39   18.06   0
  -5  -3   2  650.32   20.65   0
   5   3  -2  658.06   23.23   0
  -6  -3   2  211.61   15.48   0
   6   3  -2  221.94   15.48   0
  -7  -3   2    2.58   23.23   0
   7   3  -2    7.74   15.48   0
   0   4  -2  534.19   15.48   0
  -1  -4   2 1212.90   25.81   0
   1   4  -2 1192.26   30.97   0
  -2  -4   2  286.45    7.74   0
   2   4  -2  289.03   10.32   0
  -3  -4   2 1406.45   30.97   0
   3   4  -2 1409.03   30.97   0
  -4  -4   2  756.13   20.65   0
   4   4  -2  784.52   23.23   0
  -5  -4   2   36.13    7.74   0
   5   4  -2   30.97    7.74   0
  -6  -4   2  369.03   18.06   0
   6   4  -2  356.13   15.48   0
  -7  -4   2  129.03   33.55   0
   7   4  -2  152.26   20.65   0
   0   5  -2  214.19   10.32   0
  -1  -5   2  229.68    7.74   0
   1   5  -2  201.29   10.32   0
  -2  -5   2 1525.16   28.39   0
   2   5  -2 1509.68   33.55   0
  -3  -5   2  601.29   18.06   0
   3   5  -2  621.93   15.48   0
  -4  -5   2  221.94   12.90   0
   4   5  -2  201.29   15.48   0
  -5  -5   2  219.35   12.90   0
   5   5  -2  252.90   10.32   0
  -6  -5   2  211.61   18.06   0
   6   5  -2  209.03   12.90   0
   0   6  -2 3308.38   54.19   0
  -1  -6   2   20.65    5.16   0
   1   6  -2   18.06    7.74   0
  -2  -6   2  606.45   15.48   0
   2   6  -2  640.00   18.06   0
  -3  -6   2  412.90   15.48   0
   3   6  -2  436.13   15.48   0
  -4  -6   2  335.48   15.48   0
   4   6  -2  327.74   15.48   0
  -5  -6   2  412.90   18.06   0
   5   6  -2  436.13   20.65   0
  -6  -6   2  149.68   18.06   0
   6   6  -2  134.19   15.48   0
   0   7  -2  147.10    7.74   0
  -1  -7   2  242.58    7.74   0
   1   7  -2  227.10   12.90   0
  -2  -7   2  627.10   15.48   0
   2   7  -2  655.48   20.65   0
  -3  -7   2  454.19   15.48   0
   3   7  -2  443.87   15.48   0
  -4  -7   2  157.42   10.32   0
   4   7  -2  144.52   12.90   0
  -5  -7   2  412.90   20.65   0
   5   7  -2  410.32   20.65   0
  -6  -7   2  105.81   18.06   0
   6   7  -2  131.61   18.06   0
   0   8  -2   20.65    7.74   0
  -1  -8   2  534.19   15.48   0
   1   8  -2  575.48   20.65   0
  -2  -8   2  190.97   10.32   0
   2   8  -2  216.77   12.90   0
  -3  -8   2  774.19   20.65   0
   3   8  -2  787.10   20.65   0
  -4  -8   2  139.35   10.32   0
   4   8  -2  170.32   12.90   0
  -5  -8   2    7.74   10.32   0
   5   8  -2    0.00   12.90   0
   0   9  -2  172.90   12.90   0
  -1  -9   2  616.77   18.06   0
   1   9  -2  696.77   20.65   0
  -2  -9   2   64.52    7.74   0
   2   9  -2   56.77   10.32   0
  -3  -9   2   30.97    7.74   0
   3   9  -2   36.13   10.32   0
  -4  -9   2  183.23   12.90   0
   4   9  -2  147.10   12.90   0
  -5  -9   2  201.29   20.65   0
   5   9  -2  211.61   20.65   0
   0  10  -2  229.68   12.90   0
  -1 -10   2  258.06   10.32   0
   1  10  -2  270.97   12.90   0
  -2 -10   2   43.87   10.32   0
   2  10  -2   49.03   12.90   0
  -3 -10   2  273.55   15.48   0
   3  10  -2  234.84   20.65   0
  -4 -10   2  291.61   18.06   0
   4  10  -2  258.06   20.65   0
   0  11  -2   25.81   10.32   0
  -1 -11   2   61.94    5.16   0
   1  11  -2   61.94   12.90   0
  -2 -11   2  369.03   18.06   0
   2  11  -2  348.39   18.06   0
  -3 -11   2  116.13   12.90   0
   3  11  -2   98.06   18.06   0
  -4 -11   2   67.10   18.06   0
   4  11  -2   51.61   38.71   0
   0  12  -2  766.45   30.97   0
  -1 -12   2    7.74   15.48   0
   1  12  -2   20.65   12.90   0
  -2 -12   2  113.55   18.06   0
   2  12  -2  110.97   20.65   0
  -3 -12   2   51.61   15.48   0
   3  12  -2   72.26   28.39   0
   0  13  -2   51.61   18.06   0
  -1 -13   2   98.06   18.06   0
   1  13  -2   54.19   18.06   0
   0   0  -3 2849.03   51.61   0
   1   0  -3 1576.77   25.81   0
   2   0  -3  201.29   10.32   0
   3   0  -3   36.13    5.16   0
   4   0  -3  882.58   23.23   0
   5   0  -3  286.45   12.90   0
   6   0  -3  366.45   12.90   0
   7   0  -3   23.23   15.48   0
   0   1  -3  139.35    5.16   0
  -1  -1   3 1656.77   28.39   0
   1   1  -3 1566.45   25.81   0
  -2  -1   3 1086.45   28.39   0
   2   1  -3 1089.03   20.65   0
  -3  -1   3 1021.93   25.81   0
   3   1  -3  988.39   23.23   0
  -4  -1   3  634.84   12.90   0
   4   1  -3  645.16   18.06   0
  -5  -1   3   61.94    5.16   0
   5   1  -3   67.10    7.74   0
  -6  -1   3  301.94   12.90   0
   6   1  -3  278.71   15.48   0
  -7  -1   3   72.26   15.48   0
   7   1  -3   69.68   18.06   0
   0   2  -3 2054.19   33.55   0
  -1  -2   3  735.48   15.48   0
   1   2  -3  732.90   15.48   0
  -2  -2   3 1228.39   33.55   0
   2   2  -3 1326.45   25.81   0
  -3  -2   3 1357.42   33.55   0
   3   2  -3 1238.71   23.23   0
  -4  -2   3  110.97   15.48   0
   4   2  -3   95.48    7.74   0
  -5  -2   3  178.06   15.48   0
   5   2  -3  149.68   10.32   0
  -6  -2   3  105.81   15.48   0
   6   2  -3  118.71   10.32   0
  -7  -2   3  108.39   23.23   0
   7   2  -3  172.90   36.13   0
   0   3  -3 4536.77   74.84   0
  -1  -3   3 1083.87   23.23   0
   1   3  -3 1065.81   23.23   0
  -2  -3   3  916.13   20.65   0
   2   3  -3  960.00   25.81   0
  -3  -3   3  209.03   10.32   0
   3   3  -3  188.39    7.74   0
  -4  -3   3   77.42   10.32   0
   4   3  -3   90.32    7.74   0
  -5  -3   3  526.45   23.23   0
   5   3  -3  598.71   20.65   0
  -6  -3   3   43.87   12.90   0
   6   3  -3   56.77   10.32   0
   0   4  -3 2005.16   33.55   0
  -1  -4   3  544.52   10.32   0
   1   4  -3  549.68   15.48   0
  -2  -4   3  913.55   20.65   0
   2   4  -3  949.68   25.81   0
  -3  -4   3  861.93   30.97   0
   3   4  -3  841.29   23.23   0
  -4  -4   3   82.58   12.90   0
   4   4  -3   90.32   10.32   0
  -5  -4   3  175.48   15.48   0
   5   4  -3  188.39   10.32   0
  -6  -4   3   64.52   20.65   0
   6   4  -3   95.48   10.32   0
   0   5  -3   23.23    7.74   0
  -1  -5   3  699.35   18.06   0
   1   5  -3  750.97   25.81   0
  -2  -5   3  872.26   18.06   0
   2   5  -3  828.39   23.23   0
  -3  -5   3  606.45   18.06   0
   3   5  -3  609.03   20.65   0
  -4  -5   3  330.32   15.48   0
   4   5  -3  371.61   15.48   0
  -5  -5   3   18.06   12.90   0
   5   5  -3   20.65   10.32   0
  -6  -5   3  149.68   28.39   0
   6   5  -3  190.97   18.06   0
   0   6  -3 1148.39   30.97   0
  -1  -6   3  629.68   18.06   0
   1   6  -3  637.42   23.23   0
  -2  -6   3   95.48    7.74   0
   2   6  -3   77.42   10.32   0
  -3  -6   3   23.23   10.32   0
   3   6  -3   33.55   12.90   0
  -4  -6   3  456.77   20.65   0
   4   6  -3  495.48   20.65   0
  -5  -6   3  157.42   15.48   0
   5   6  -3  152.26   12.90   0
  -6  -6   3  206.45   25.81   0
   6   6  -3  224.52   23.23   0
   0   7  -3   90.32   10.32   0
  -1  -7   3  789.68   20.65   0
   1   7  -3  810.32   33.55   0
  -2  -7   3  366.45   15.48   0
   2   7  -3  350.97   15.48   0
  -3  -7   3  350.97   15.48   0
   3   7  -3  356.13   15.48   0
  -4  -7   3  294.19   15.48   0
   4   7  -3  314.84   15.48   0
  -5  -7   3   56.77   15.48   0
   5   7  -3   64.52   12.90   0
   0   8  -3  265.81   12.90   0
  -1  -8   3  227.10   10.32   0
   1   8  -3  245.16   12.90   0
  -2  -8   3  480.00   18.06   0
   2   8  -3  477.42   18.06   0
  -3  -8   3  521.29   20.65   0
   3   8  -3  593.55   20.65   0
  -4  -8   3   41.29   10.32   0
   4   8  -3   46.45   15.48   0
  -5  -8   3   30.97   18.06   0
   5   8  -3   41.29   15.48   0
   0   9  -3  890.32   25.81   0
  -1  -9   3  273.55   12.90   0
   1   9  -3  252.90   15.48   0
  -2  -9   3  273.55   15.48   0
   2   9  -3  304.52   18.06   0
  -3  -9   3   72.26   10.32   0
   3   9  -3   77.42   10.32   0
  -4  -9   3   33.55   12.90   0
   4   9  -3   41.29   15.48   0
  -5  -9   3  214.19   25.81   0
   5   9  -3  201.29   51.61   0
   0  10  -3  547.10   20.65   0
  -1 -10   3  131.61   10.32   0
   1  10  -3  136.77   12.90   0
  -2 -10   3  201.29   15.48   0
   2  10  -3  227.10   15.48   0
  -3 -10   3  201.29   15.48   0
   3  10  -3  178.06   15.48   0
  -4 -10   3   38.71   18.06   0
   4  10  -3   30.97   49.03   0
   0  11  -3    2.58   12.90   0
  -1 -11   3  113.55   10.32   0
   1  11  -3   98.06   15.48   0
  -2 -11   3  152.26   15.48   0
   2  11  -3  224.52   18.06   0
  -3 -11   3  160.00   23.23   0
   3  11  -3  116.13   18.06   0
   0  12  -3  211.61   20.65   0
  -1 -12   3  167.74   20.65   0
   1  12  -3  131.61   18.06   0
  -2 -12   3   28.39   20.65   0
   2  12  -3   36.13   15.48   0
   0   0  -4  825.81   20.65   0
   1   0  -4  350.97   10.32   0
   2   0  -4   49.03    5.16   0
   3   0  -4  443.87   12.90   0
   4   0  -4  309.68   12.90   0
   5   0  -4  807.74   18.06   0
   6   0  -4  126.45   15.48   0
   0   1  -4 1470.97   23.23   0
  -1  -1   4  521.29   12.90   0
   1   1  -4  526.45   12.90   0
  -2  -1   4  810.32   20.65   0
   2   1  -4  833.55   18.06   0
  -3  -1   4 1109.68   33.55   0
   3   1  -4 1145.81   23.23   0
  -4  -1   4   95.48   10.32   0
   4   1  -4   95.48    7.74   0
  -5  -1   4  206.45   15.48   0
   5   1  -4  232.26   10.32   0
  -6  -1   4   56.77   12.90   0
   6   1  -4   69.68   10.32   0
   0   2  -4   72.26    7.74   0
  -1  -2   4  970.32   18.06   0
   1   2  -4  926.45   20.65   0
  -2  -2   4  823.23   20.65   0
   2   2  -4  833.55   20.65   0
  -3  -2   4  420.64   18.06   0
   3   2  -4  420.64   15.48   0
  -4  -2   4  232.26   12.90   0
   4   2  -4  214.19   10.32   0
  -5  -2   4   12.90   12.90   0
   5   2  -4    7.74    7.74   0
  -6  -2   4  144.52   20.65   0
   6   2  -4  180.64   12.90   0
   0   3  -4 1576.77   30.97   0
  -1  -3   4  614.19   12.90   0
   1   3  -4  572.90   15.48   0
  -2  -3   4   74.84    7.74   0
   2   3  -4  100.65   10.32   0
  -3  -3   4   18.06    7.74   0
   3   3  -4   28.39    7.74   0
  -4  -3   4  621.93   20.65   0
   4   3  -4  645.16   15.48   0
  -5  -3   4  183.23   15.48   0
   5   3  -4  180.64   10.32   0
  -6  -3   4  276.13   30.97   0
   6   3  -4  291.61   18.06   0
   0   4  -4  154.84   10.32   0
  -1  -4   4  970.32   23.23   0
   1   4  -4 1016.77   23.23   0
  -2  -4   4  480.00   12.90   0
   2   4  -4  526.45   15.48   0
  -3  -4   4  291.61   12.90   0
   3   4  -4  286.45   12.90   0
  -4  -4   4  190.97   15.48   0
   4   4  -4  214.19   12.90   0
  -5  -4   4   10.32   15.48   0
   5   4  -4   12.90    7.74   0
  -6  -4   4  149.68   25.81   0
   6   4  -4  131.61   23.23   0
   0   5  -4  769.03   23.23   0
  -1  -5   4  410.32   15.48   0
   1   5  -4  418.06   20.65   0
  -2  -5   4  575.48   15.48   0
   2   5  -4  560.00   15.48   0
  -3  -5   4  732.90   18.06   0
   3   5  -4  779.35   28.39   0
  -4  -5   4   59.35   10.32   0
   4   5  -4   54.19   12.90   0
  -5  -5   4   87.74   10.32   0
   5   5  -4   98.06   10.32   0
  -6  -5   4   56.77   20.65   0
   6   5  -4   41.29   20.65   0
   0   6  -4  513.55   20.65   0
  -1  -6   4  183.23    7.74   0
   1   6  -4  198.71   15.48   0
  -2  -6   4   56.77    7.74   0
   2   6  -4   43.87    7.74   0
  -3  -6   4  281.29   15.48   0
   3   6  -4  234.84   15.48   0
  -4  -6   4  162.58   12.90   0
   4   6  -4  136.77   18.06   0
  -5  -6   4  397.42   25.81   0
   5   6  -4  441.29   25.81   0
   0   7  -4  699.35   20.65   0
  -1  -7   4  172.90   10.32   0
   1   7  -4  147.10   12.90   0
  -2  -7   4  312.26   12.90   0
   2   7  -4  296.77   15.48   0
  -3  -7   4  487.74   23.23   0
   3   7  -4  392.26   20.65   0
  -4  -7   4   36.13   12.90   0
   4   7  -4   49.03   15.48   0
  -5  -7   4  149.68   25.81   0
   5   7  -4  180.64   30.97   0
   0   8  -4    2.58    7.74   0
  -1  -8   4  247.74   10.32   0
   1   8  -4  240.00   18.06   0
  -2  -8   4  387.10   18.06   0
   2   8  -4  343.23   18.06   0
  -3  -8   4  229.68   18.06   0
   3   8  -4  201.29   20.65   0
  -4  -8   4   69.68   20.65   0
   4   8  -4   87.74   20.65   0
  -5  -8   4    2.58   18.06   0
   5   8  -4   25.81   43.87   0
   0   9  -4  438.71   18.06   0
  -1  -9   4  165.16   10.32   0
   1   9  -4  165.16   12.90   0
  -2  -9   4   36.13   10.32   0
   2   9  -4   41.29   10.32   0
  -3  -9   4   12.90   12.90   0
   3   9  -4   18.06    7.74   0
  -4  -9   4  180.64   23.23   0
   4   9  -4  188.39   33.55   0
   0  10  -4   69.68   10.32   0
  -1 -10   4  273.55   12.90   0
   1  10  -4  247.74   15.48   0
  -2 -10   4  105.81   15.48   0
   2  10  -4  123.87   15.48   0
  -3 -10   4   74.84   18.06   0
   3  10  -4   46.45   20.65   0
   0  11  -4   95.48   12.90   0
  -1 -11   4   82.58   15.48   0
   1  11  -4  103.23   18.06   0
  -2 -11   4  108.39   20.65   0
   2  11  -4  100.65   20.65   0
   0  12  -4  121.29   28.39   0
   0   0  -5  172.90   10.32   0
   1   0  -5 1032.26   20.65   0
   2   0  -5   10.32    5.16   0
   3   0  -5   51.61    5.16   0
   4   0  -5  154.84   12.90   0
   5   0  -5  294.19   12.90   0
   6   0  -5   59.35   20.65   0
   0   1  -5   98.06    7.74   0
  -1  -1   5  456.77   15.48   0
   1   1  -5  443.87   12.90   0
  -2  -1   5  167.74   10.32   0
   2   1  -5  170.32   10.32   0
  -3  -1   5  771.61   28.39   0
   3   1  -5  701.93   20.65   0
  -4  -1   5  410.32   15.48   0
   4   1  -5  412.90   12.90   0
  -5  -1   5   18.06   10.32   0
   5   1  -5   20.65    5.16   0
  -6  -1   5  147.10   28.39   0
   6   1  -5  167.74   30.97   0
   0   2  -5  136.77    7.74   0
  -1  -2   5   64.52    7.74   0
   1   2  -5   74.84    7.74   0
  -2  -2   5  712.26   18.06   0
   2   2  -5  763.87   18.06   0
  -3  -2   5  348.39   15.48   0
   3   2  -5  327.74   12.90   0
  -4  -2   5   98.06   10.32   0
   4   2  -5  116.13   12.90   0
  -5  -2   5  245.16   18.06   0
   5   2  -5  281.29   10.32   0
  -6  -2   5  147.10   28.39   0
   6   2  -5  121.29   30.97   0
   0   3  -5 2056.77   33.55   0
  -1  -3   5  160.00   10.32   0
   1   3  -5  172.90   10.32   0
  -2  -3   5  276.13   12.90   0
   2   3  -5  294.19   10.32   0
  -3  -3   5   20.65   10.32   0
   3   3  -5   10.32    7.74   0
  -4  -3   5  247.74   12.90   0
   4   3  -5  260.64   15.48   0
  -5  -3   5   64.52   15.48   0
   5   3  -5   49.03   12.90   0
  -6  -3   5   43.87   30.97   0
   6   3  -5  105.81   28.39   0
   0   4  -5  188.39   10.32   0
  -1  -4   5   43.87    7.74   0
   1   4  -5   54.19    7.74   0
  -2  -4   5  420.64   15.48   0
   2   4  -5  482.58   10.32   0
  -3  -4   5  278.71   12.90   0
   3   4  -5  314.84   15.48   0
  -4  -4   5   67.10   10.32   0
   4   4  -5   59.35   10.32   0
  -5  -4   5  278.71   23.23   0
   5   4  -5  307.10   23.23   0
   0   5  -5   20.65    5.16   0
  -1  -5   5  325.16   10.32   0
   1   5  -5  314.84   10.32   0
  -2  -5   5  118.71    7.74   0
   2   5  -5  141.94    5.16   0
  -3  -5   5  552.26   18.06   0
   3   5  -5  539.35   20.65   0
  -4  -5   5  193.55   12.90   0
   4   5  -5  160.00   18.06   0
  -5  -5   5   -5.16   15.48   0
   5   5  -5   20.65   20.65   0
   0   6  -5   56.77    7.74   0
  -1  -6   5  575.48   18.06   0
   1   6  -5  580.64   20.65   0
  -2  -6   5   20.65    7.74   0
   2   6  -5   25.81    7.74   0
  -3  -6   5   36.13    5.16   0
   3   6  -5   28.39   10.32   0
  -4  -6   5   77.42   12.90   0
   4   6  -5   92.90   15.48   0
  -5  -6   5  190.97   20.65   0
   5   6  -5  167.74   25.81   0
   0   7  -5   82.58   10.32   0
  -1  -7   5  167.74   10.32   0
   1   7  -5  170.32   18.06   0
  -2  -7   5   49.03    7.74   0
   2   7  -5   59.35    7.74   0
  -3  -7   5  270.97   20.65   0
   3   7  -5  309.68   18.06   0
  -4  -7   5  211.61   20.65   0
   4   7  -5  216.77   23.23   0
   0   8  -5   12.90   12.90   0
  -1  -8   5   38.71    5.16   0
   1   8  -5   54.19   12.90   0
  -2  -8   5  307.10   20.65   0
   2   8  -5  345.81   15.48   0
  -3  -8   5  149.68   23.23   0
   3   8  -5  118.71   30.97   0
  -4  -8   5   36.13   18.06   0
   4   8  -5   33.55   18.06   0
   0   9  -5  588.39   23.23   0
  -1  -9   5   43.87    7.74   0
   1   9  -5   59.35   12.90   0
  -2  -9   5   95.48   18.06   0
   2   9  -5   90.32   18.06   0
  -3  -9   5    5.16   12.90   0
   3   9  -5    5.16   23.23   0
   0  10  -5   74.84   15.48   0
  -1 -10   5   10.32   28.39   0
   1  10  -5   18.06   15.48   0
  -2 -10   5   92.90   20.65   0
   2  10  -5  110.97   23.23   0
   0  11  -5    0.00   30.97   0
   0   0  -6   33.55    7.74   0
   1   0  -6  304.52   12.90   0
   2   0  -6   12.90    7.74   0
   3   0  -6  193.55   10.32   0
   4   0  -6    0.00   15.48   0
   5   0  -6  374.19   25.81   0
   0   1  -6  872.26   20.65   0
  -1  -1   6  283.87   12.90   0
   1   1  -6  250.32   10.32   0
  -2  -1   6  260.64   12.90   0
   2   1  -6  265.81   12.90   0
  -3  -1   6  469.68   18.06   0
   3   1  -6  472.26   18.06   0
  -4  -1   6   10.32   10.32   0
   4   1  -6    5.16    7.74   0
  -5  -1   6    5.16   15.48   0
   5   1  -6   15.48   20.65   0
   0   2  -6    7.74    7.74   0
  -1  -2   6  301.94   12.90   0
   1   2  -6  322.58   12.90   0
  -2  -2   6  498.06   18.06   0
   2   2  -6  477.42   18.06   0
  -3  -2   6   20.65   10.32   0
   3   2  -6    5.16   10.32   0
  -4  -2   6   77.42   12.90   0
   4   2  -6   82.58   12.90   0
  -5  -2   6   23.23   15.48   0
   5   2  -6   20.65   23.23   0
   0   3  -6  616.77   15.48   0
  -1  -3   6   77.42   10.32   0
   1   3  -6   69.68    7.74   0
  -2  -3   6    7.74    7.74   0
   2   3  -6   15.48    7.74   0
  -3  -3   6   10.32   10.32   0
   3   3  -6   15.48   10.32   0
  -4  -3   6  474.84   18.06   0
   4   3  -6  474.84   23.23   0
  -5  -3   6    0.00   15.48   0
   5   3  -6  -12.90   18.06   0
   0   4  -6   38.71    7.74   0
  -1  -4   6  392.26   15.48   0
   1   4  -6  353.55   12.90   0
  -2  -4   6  335.48   15.48   0
   2   4  -6  356.13   15.48   0
  -3  -4   6   10.32   10.32   0
   3   4  -6    2.58   10.32   0
  -4  -4   6   46.45   10.32   0
   4   4  -6   72.26   15.48   0
  -5  -4   6   49.03   18.06   0
   5   4  -6   15.48   23.23   0
   0   5  -6  400.00   12.90   0
  -1  -5   6  206.45   12.90   0
   1   5  -6  234.84   10.32   0
  -2  -5   6  170.32   10.32   0
   2   5  -6  170.32    7.74   0
  -3  -5   6  369.03   15.48   0
   3   5  -6  418.06   20.65   0
  -4  -5   6   18.06   12.90   0
   4   5  -6   18.06   20.65   0
   0   6  -6    7.74    5.16   0
  -1  -6   6  170.32   12.90   0
   1   6  -6  188.39   12.90   0
  -2  -6   6    7.74    5.16   0
   2   6  -6   15.48   10.32   0
  -3  -6   6  100.65   10.32   0
   3   6  -6   98.06   15.48   0
  -4  -6   6   -2.58   15.48   0
   4   6  -6   12.90   18.06   0
   0   7  -6  536.77   15.48   0
  -1  -7   6  105.81   12.90   0
   1   7  -6  121.29   12.90   0
  -2  -7   6  105.81   12.90   0
   2   7  -6  129.03    7.74   0
  -3  -7   6  188.39   20.65   0
   3   7  -6  170.32   23.23   0
   0   8  -6   -5.16   10.32   0
  -1  -8   6   54.19   12.90   0
   1   8  -6   59.35   12.90   0
  -2  -8   6  211.61   20.65   0
   2   8  -6  198.71   23.23   0
  -3  -8   6    5.16   20.65   0
   3   8  -6   15.48   18.06   0
   0   9  -6  172.90   30.97   0
  -1  -9   6    7.74   18.06   0
   1   9  -6   41.29   15.48   0
  -2  -9   6   18.06   23.23   0
   2   9  -6    5.16   18.06   0
   0   0  -7   18.06   10.32   0
   1   0  -7  590.97   23.23   0
   2   0  -7    0.00   10.32   0
   3   0  -7    2.58   12.90   0
   4   0  -7   -5.16   25.81   0
   0   1  -7   72.26    7.74   0
  -1  -1   7  154.84   10.32   0
   1   1  -7  149.68   12.90   0
  -2  -1   7    2.58   12.90   0
   2   1  -7   -7.74   10.32   0
  -3  -1   7  252.90   15.48   0
   3   1  -7  234.84   20.65   0
  -4  -1   7   85.16   28.39   0
   4   1  -7   69.68   23.23   0
   0   2  -7   18.06    7.74   0
  -1  -2   7   -5.16    7.74   0
   1   2  -7    5.16    7.74   0
  -2  -2   7  286.45   15.48   0
   2   2  -7  273.55   15.48   0
  -3  -2   7   77.42   12.90   0
   3   2  -7   90.32   12.90   0
  -4  -2   7   61.94   18.06   0
   4   2  -7   49.03   20.65   0
   0   3  -7  812.90   23.23   0
  -1  -3   7   -5.16    7.74   0
   1   3  -7    2.58    7.74   0
  -2  -3   7  116.13   12.90   0
   2   3  -7  126.45   10.32   0
  -3  -3   7    7.74   12.90   0
   3   3  -7    2.58   12.90   0
  -4  -3   7   69.68   18.06   0
   4   3  -7   51.61   18.06   0
   0   4  -7   15.48    5.16   0
  -1  -4   7   10.32   10.32   0
   1   4  -7    7.74    7.74   0
  -2  -4   7  198.71   18.06   0
   2   4  -7  178.06   10.32   0
  -3  -4   7   67.10   12.90   0
   3   4  -7   90.32   15.48   0
   0   5  -7   18.06    7.74   0
  -1  -5   7  108.39   12.90   0
   1   5  -7  113.55   10.32   0
  -2  -5   7    2.58    7.74   0
   2   5  -7   -7.74    7.74   0
  -3  -5   7  209.03   25.81   0
   3   5  -7  224.52   25.81   0
   0   6  -7    2.58   10.32   0
  -1  -6   7  363.87   20.65   0
   1   6  -7  387.10   18.06   0
  -2  -6   7   10.32   12.90   0
   2   6  -7   12.90   18.06   0
   0   7  -7   64.52   15.48   0
  -1  -7   7   49.03   12.90   0
   1   7  -7   36.13   25.81   0
  -2  -7   7   -2.58   18.06   0
   2   7  -7  -23.23   38.71   0
   0   8  -7   12.90   15.48   0
   0   0  -8   54.19   15.48   0
   1   0  -8   33.55   12.90   0
   2   0  -8   10.32   15.48   0
   0   1  -8  103.23   12.90   0
  -1  -1   8   64.52   15.48   0
   1   1  -8   61.94   12.90   0
  -2  -1   8   43.87   12.90   0
   2   1  -8   41.29   18.06   0
   0   2  -8    0.00   12.90   0
  -1  -2   8   56.77   12.90   0
   1   2  -8   43.87   10.32   0
  -2  -2   8  103.23   15.48   0
   2   2  -8  116.13   18.06   0
   0   3  -8   74.84   12.90   0
  -1  -3   8   12.90   12.90   0
   1   3  -8   25.81   10.32   0
  -2  -3   8   -2.58   18.06   0
   2   3  -8    5.16   18.06   0
   0   4  -8  -12.90   12.90   0
  -1  -4   8   67.10   12.90   0
   1   4  -8   67.10   20.65   0
   0   5  -8   49.03   18.06   0
;
_shelx_hkl_checksum   28792
