# Supplementary material
Source: MDPI journal article supplement (https://www.mdpi.com/2304-6740/4/4/41)
Supplement: s1 [file s1 › inorganics-04-00041-supplementary file/ZnBrN3H8.cif]

 
data_C:\Crystal\Vrac\79_3\ZnBrN3H8
 
_audit_creation_method            SHELXL-2014
_chemical_name_systematic
;
 ?
;
_chemical_name_common             ?
_chemical_melting_point           ?
_chemical_formula_moiety          ?
_chemical_formula_sum
 'Br H8 N3 Zn' 
_chemical_formula_weight          195.37

loop_
 _atom_type_symbol
 _atom_type_description
 _atom_type_scat_dispersion_real
 _atom_type_scat_dispersion_imag
 _atom_type_scat_source
 'Zn'  'Zn'   0.2839   1.4301
 'International Tables Vol C Tables 4.2.6.8 and 6.1.1.4'
 'Br'  'Br'  -0.2901   2.4595
 'International Tables Vol C Tables 4.2.6.8 and 6.1.1.4'
 'N'  'N'   0.0061   0.0033
 'International Tables Vol C Tables 4.2.6.8 and 6.1.1.4'
 'H'  'H'   0.0000   0.0000
 'International Tables Vol C Tables 4.2.6.8 and 6.1.1.4'
 
_space_group_crystal_system       monoclinic
_space_group_IT_number            14
_space_group_name_H-M_alt         'P 21/n'
_space_group_name_Hall            '-P 2yn'
 
_shelx_space_group_comment
;
The symmetry employed for this shelxl refinement is uniquely defined
by the following loop, which should always be used as a source of
symmetry information in preference to the above space-group names.
They are only intended as comments.
;
 
loop_
 _space_group_symop_operation_xyz
 'x, y, z'
 '-x+1/2, y+1/2, -z+1/2'
 '-x, -y, -z'
 'x-1/2, -y-1/2, z-1/2'
 
_cell_length_a                    7.6055(4)
_cell_length_b                    5.9772(4)
_cell_length_c                    12.5722(8)
_cell_angle_alpha                 90
_cell_angle_beta                  93.475(4)
_cell_angle_gamma                 90
_cell_volume                      570.48(6)
_cell_formula_units_Z             4
_cell_measurement_temperature     100(2)
_cell_measurement_reflns_used     ? 
_cell_measurement_theta_min       ? 
_cell_measurement_theta_max       ? 
 
_exptl_crystal_description        ? 
_exptl_crystal_colour             ? 
_exptl_crystal_density_meas       ? 
_exptl_crystal_density_method     ?              
_exptl_crystal_density_diffrn     2.275          
_exptl_crystal_F_000              376
_exptl_transmission_factor_min    ?                                             
_exptl_transmission_factor_max    ?                                             
_exptl_crystal_size_max           ? 
_exptl_crystal_size_mid           ? 
_exptl_crystal_size_min           ? 
_exptl_absorpt_coefficient_mu     11.165
_shelx_estimated_absorpt_T_min    ? 
_shelx_estimated_absorpt_T_max    ? 
_exptl_absorpt_correction_type    ? 
_exptl_absorpt_correction_T_min   ? 
_exptl_absorpt_correction_T_max   ? 
_exptl_absorpt_process_details    ? 
 
_exptl_special_details
;
 ?
;
 
_diffrn_ambient_temperature       100(2)
_diffrn_radiation_wavelength      0.71073
_diffrn_radiation_type            MoK\a
_diffrn_source                    ?                       
_diffrn_measurement_device_type   ? 
_diffrn_measurement_method        ? 
_diffrn_detector_area_resol_mean  ? 
_diffrn_reflns_number             1298
_diffrn_reflns_av_unetI/netI      0.0360
_diffrn_reflns_av_R_equivalents   ?
_diffrn_reflns_limit_h_min        -9
_diffrn_reflns_limit_h_max        9
_diffrn_reflns_limit_k_min        -7
_diffrn_reflns_limit_k_max        7
_diffrn_reflns_limit_l_min        -16
_diffrn_reflns_limit_l_max        16
_diffrn_reflns_theta_min          3.051
_diffrn_reflns_theta_max          27.491
_diffrn_reflns_theta_full         25.242
_diffrn_measured_fraction_theta_max   0.573
_diffrn_measured_fraction_theta_full  0.573
_diffrn_reflns_Laue_measured_fraction_max    0.573
_diffrn_reflns_Laue_measured_fraction_full   0.573
_diffrn_reflns_point_group_measured_fraction_max   0.573
_diffrn_reflns_point_group_measured_fraction_full  0.573
_reflns_number_total              1298
_reflns_number_gt                 1085
_reflns_threshold_expression      'I > 2\s(I)'
_reflns_Friedel_coverage          0.000
_reflns_Friedel_fraction_max      .
_reflns_Friedel_fraction_full     .
 
_reflns_special_details
;
 _reflns_Friedel_fraction is defined as the number of unique
 Friedel pairs measured divided by the number that would be
 possible theoretically, ignoring centric projections and
 systematic absences.
;
 
_computing_data_collection        ?
_computing_cell_refinement        ?
_computing_data_reduction         ?
_computing_structure_solution     ?
_computing_structure_refinement   'SHELXL-2014 (Sheldrick, 2014)'
_computing_molecular_graphics     ?
_computing_publication_material   ?
 
_refine_special_details
;
 Refined as a 2-component perfect twin.
;
_refine_ls_structure_factor_coef  Fsqd
_refine_ls_matrix_type            full
_refine_ls_weighting_scheme       calc
_refine_ls_weighting_details
'w=1/[\s^2^(Fo^2^)+(0.0470P)^2^+2.5439P] where P=(Fo^2^+2Fc^2^)/3'
_atom_sites_solution_primary      ?
_atom_sites_solution_secondary    ?
_atom_sites_solution_hydrogens    difmap
_refine_ls_hydrogen_treatment     refxyz
_refine_ls_extinction_method      SHELXL
_refine_ls_extinction_coef        0.0025(13)
_refine_ls_extinction_expression
 'Fc^*^=kFc[1+0.001xFc^2^\l^3^/sin(2\q)]^-1/4^'
_refine_ls_number_reflns          1298
_refine_ls_number_parameters      71
_refine_ls_number_restraints      8
_refine_ls_R_factor_all           0.0445
_refine_ls_R_factor_gt            0.0344
_refine_ls_wR_factor_ref          0.0864
_refine_ls_wR_factor_gt           0.0833
_refine_ls_goodness_of_fit_ref    1.047
_refine_ls_restrained_S_all       1.045
_refine_ls_shift/su_max           1.140
_refine_ls_shift/su_mean          0.193
 
loop_
 _atom_site_label
 _atom_site_type_symbol
 _atom_site_fract_x
 _atom_site_fract_y
 _atom_site_fract_z
 _atom_site_U_iso_or_equiv
 _atom_site_adp_type
 _atom_site_occupancy
 _atom_site_site_symmetry_order  
 _atom_site_calc_flag
 _atom_site_refinement_flags_posn
 _atom_site_refinement_flags_adp
 _atom_site_refinement_flags_occupancy
 _atom_site_disorder_assembly
 _atom_site_disorder_group
Br1 Br 0.1858(4) 0.2474(7) 0.4382(4) 0.0214(2) Uani 1 1 d . . . . .
Zn1 Zn 0.1606(4) 0.14403(15) 0.7794(4) 0.0166(3) Uani 1 1 d . . . . .
N1 N 0.163(3) 0.243(5) 0.935(2) 0.021(7) Uani 1 1 d D . . . .
H1A H 0.054(10) 0.28(5) 0.954(16) 0.032 Uiso 1 1 d D U . . .
H1B H 0.20(3) 0.14(2) 0.983(10) 0.032 Uiso 1 1 d D U . . .
H1C H 0.231(18) 0.364(18) 0.942(14) 0.032 Uiso 1 1 d D U . . .
N2 N 0.919(4) 0.255(5) 0.706(2) 0.023(8) Uani 1 1 d D . . . .
H2A H 0.83(3) 0.22(2) 0.750(17) 0.035 Uiso 1 1 d D U . . .
H2B H 0.89(3) 0.380(18) 0.668(15) 0.035 Uiso 1 1 d D U . . .
H2C H 0.88(3) 0.13(2) 0.671(17) 0.035 Uiso 1 1 d D U . . .
N3 N 0.859(3) 0.1900(13) 0.221(3) 0.015(3) Uani 1 1 d D . . . .
H3A H 0.946(12) 0.26(2) 0.257(8) 0.018 Uiso 1 1 d D U . . .
H3B H 0.901(14) 0.20(2) 0.157(4) 0.018 Uiso 1 1 d D U . . .
 
loop_
 _atom_site_aniso_label
 _atom_site_aniso_U_11
 _atom_site_aniso_U_22
 _atom_site_aniso_U_33
 _atom_site_aniso_U_23
 _atom_site_aniso_U_13
 _atom_site_aniso_U_12
Br1 0.028(3) 0.0153(4) 0.021(3) 0.001(2) -0.0031(18) 0.000(3)
Zn1 0.019(3) 0.0126(5) 0.017(3) 0.002(3) -0.0011(18) 0.0022(15)
N1 0.030(10) 0.022(17) 0.012(11) -0.004(17) 0.000(8) 0.02(3)
N2 0.029(13) 0.01(2) 0.027(12) -0.020(13) -0.002(9) -0.001(17)
N3 0.019(9) 0.011(4) 0.015(9) 0.001(7) 0.002(6) -0.001(5)
 
_geom_special_details
;
 All esds (except the esd in the dihedral angle between two l.s. planes)
 are estimated using the full covariance matrix.  The cell esds are taken
 into account individually in the estimation of esds in distances, angles
 and torsion angles; correlations between esds in cell parameters are only
 used when they are defined by crystal symmetry.  An approximate (isotropic)
 treatment of cell esds is used for estimating esds involving l.s. planes.
;
 
loop_
 _geom_bond_atom_site_label_1
 _geom_bond_atom_site_label_2
 _geom_bond_distance
 _geom_bond_site_symmetry_2
 _geom_bond_publ_flag
Zn1 N3 1.984(8) 4_566 ?
Zn1 N3 2.002(8) 3_656 ?
Zn1 N1 2.04(3) . ?
Zn1 N2 2.11(3) 1_455 ?
N1 H1A 0.91(7) . ?
N1 H1B 0.89(3) . ?
N1 H1C 0.89(3) . ?
N2 Zn1 2.11(3) 1_655 ?
N2 H2A 0.91(4) . ?
N2 H2B 0.90(4) . ?
N2 H2C 0.90(4) . ?
N3 Zn1 1.984(8) 4_665 ?
N3 Zn1 2.002(8) 3_656 ?
N3 H3A 0.89(3) . ?
N3 H3B 0.89(3) . ?
 
loop_
 _geom_angle_atom_site_label_1
 _geom_angle_atom_site_label_2
 _geom_angle_atom_site_label_3
 _geom_angle
 _geom_angle_site_symmetry_1
 _geom_angle_site_symmetry_3
 _geom_angle_publ_flag
N3 Zn1 N3 123.8(2) 4_566 3_656 ?
N3 Zn1 N1 104.2(14) 4_566 . ?
N3 Zn1 N1 106.7(14) 3_656 . ?
N3 Zn1 N2 109.9(12) 4_566 1_455 ?
N3 Zn1 N2 104.5(12) 3_656 1_455 ?
N1 Zn1 N2 106.7(6) . 1_455 ?
Zn1 N1 H1A 112(10) . . ?
Zn1 N1 H1B 116(10) . . ?
H1A N1 H1B 103(10) . . ?
Zn1 N1 H1C 108(10) . . ?
H1A N1 H1C 109(10) . . ?
H1B N1 H1C 110(10) . . ?
Zn1 N2 H2A 107(10) 1_655 . ?
Zn1 N2 H2B 131(10) 1_655 . ?
H2A N2 H2B 112(10) . . ?
Zn1 N2 H2C 100(10) 1_655 . ?
H2A N2 H2C 83(10) . . ?
H2B N2 H2C 113(10) . . ?
Zn1 N3 Zn1 116.2(5) 4_665 3_656 ?
Zn1 N3 H3A 97(9) 4_665 . ?
Zn1 N3 H3A 123(10) 3_656 . ?
Zn1 N3 H3B 128(8) 4_665 . ?
Zn1 N3 H3B 97(8) 3_656 . ?
H3A N3 H3B 97(9) . . ?
 
_refine_diff_density_max    1.229
_refine_diff_density_min   -1.132
_refine_diff_density_rms    0.136

_shelxl_version_number 2014-3

_shelx_res_file
;
TITL
CELL  0.71073  7.60550  5.97720 12.57220 90.00000 93.47500 90.00000
ZERR 4  0.00040  0.00040  0.00080  0.00000  0.00400  0.00000
LATT 1
SYMM -X+ 0.50000, Y+ 0.50000, -Z+ 0.50000
SFAC ZN BR N H
UNIT 4 4 12 32
TEMP 25
PLAN 30
ACTA
FMAP 2
L.S. 4
BOND $H
TEMP 25
FMAP 2
PLAN 20
OMIT 0 55
DFIX 0.89 N1 H1A
DFIX 0.89 N1 H1B
DFIX 0.89 N1 H1C
DFIX 0.89 N2 H2A
DFIX 0.89 N2 H2B
DFIX 0.89 N2 H2C
DFIX 0.89 N3 H3A
DFIX 0.89 N3 H3B
HTAB

WGHT    0.047000    2.543900
EXTI    0.002540
FVAR       0.50535
BR1   2    0.185807    0.247375    0.438209    11.00000    0.02755    0.01528 =
         0.02092    0.00102   -0.00310   -0.00032
ZN1   1    0.160559    0.144033    0.779429    11.00000    0.01938    0.01256 =
         0.01749    0.00161   -0.00110    0.00215
N1    3    0.163453    0.242808    0.934707    11.00000    0.02975    0.02178 =
         0.01207   -0.00423   -0.00021    0.01961
H1A   4    0.054004    0.278534    0.954130    11.00000   -1.50000
H1B   4    0.199157    0.139928    0.982751    11.00000   -1.50000
H1C   4    0.231367    0.364081    0.941624    11.00000   -1.50000
N2    3    0.919257    0.255333    0.705875    11.00000    0.02910    0.01344 =
         0.02702   -0.01989   -0.00238   -0.00146
H2A   4    0.832945    0.217405    0.750199    11.00000   -1.50000
H2B   4    0.893175    0.380084    0.668321    11.00000   -1.50000
H2C   4    0.883517    0.129263    0.671357    11.00000   -1.50000
N3    3    0.858977    0.189998    0.220957    11.00000    0.01880    0.01070 =
         0.01516    0.00117    0.00198   -0.00099
H3A   4    0.945787    0.263355    0.256924    11.00000   -1.20000
H3B   4    0.901098    0.203823    0.156674    11.00000   -1.20000
HKLF 5

REM
REM R1 =  0.0344 for    1085 Fo > 4sig(Fo)  and  0.0445 for all    1298 data
REM     71 parameters refined using      8 restraints

END

WGHT      0.0470      2.5438

REM Instructions for potential hydrogen bonds
EQIV $1 x-1/2, -y+1/2, z+1/2
HTAB N1 Br1_$1
EQIV $2 -x+1/2, y-1/2, -z+3/2
HTAB N1 Br1_$2
EQIV $3 -x+1/2, y+1/2, -z+3/2
HTAB N1 Br1_$3
EQIV $4 x+1/2, -y+1/2, z+1/2
HTAB N2 Br1_$4
EQIV $5 -x+1, -y+1, -z+1
HTAB N2 Br1_$5
EQIV $6 -x+1, -y, -z+1
HTAB N2 Br1_$6
EQIV $7 x+1, y, z
HTAB N3 Br1_$7
EQIV $8 x+1/2, -y+1/2, z-1/2
HTAB N3 Br1_$8

REM Highest difference peak  1.229,  deepest hole -1.132,  1-sigma level  0.136
Q1    1   0.2016  0.2502  0.4630  11.00000  0.05    1.23
Q2    1   0.2914  0.2502  0.4209  11.00000  0.05    0.94
Q3    1   0.0774  0.2493  0.4552  11.00000  0.05    0.80
Q4    1   0.1288  0.2479  0.9547  11.00000  0.05    0.59
Q5    1   0.1939  0.0975  0.4366  11.00000  0.05    0.55
Q6    1   0.1958  0.4024  0.4398  11.00000  0.05    0.54
Q7    1   0.2656  0.1464  0.7669  11.00000  0.05    0.53
Q8    1   0.0630  0.1625  0.7910  11.00000  0.05    0.47
Q9    1   0.0920  0.0668  0.4231  11.00000  0.05    0.46
Q10   1   0.0395  0.2358  0.7749  11.00000  0.05    0.45
Q11   1  -0.0868  0.2553  0.9321  11.00000  0.05    0.40
Q12   1   0.7628  0.1502  0.2612  11.00000  0.05    0.39
Q13   1   1.1039  0.2504  0.1178  11.00000  0.05    0.39
Q14   1   1.0372  0.2442  0.7244  11.00000  0.05    0.37
Q15   1   0.7273  0.3670  0.6005  11.00000  0.05    0.36
Q16   1   0.3037  0.2427  0.8095  11.00000  0.05    0.36
Q17   1   0.9641  0.2417  0.6808  11.00000  0.05    0.34
Q18   1   1.0727  0.4274  0.5661  11.00000  0.05    0.34
Q19   1  -0.0177  0.2484  0.4927  11.00000  0.05    0.33
Q20   1   0.0863  0.4300  0.4272  11.00000  0.05    0.33
;
_shelx_res_checksum   39580

_shelx_hkl_file
;
   1   0  -3 3769.13   63.50  -2 0.00000 0.00000 0.00000 0.00000 0.00000 0.00000
   2   0   0 3769.13   63.50   1 0.00000 0.00000 0.00000 0.00000 0.00000 0.00000
   2   0  -6 1477.49   26.08  -2 0.00000 0.00000 0.00000 0.00000 0.00000 0.00000
   4   0   0 1477.49   26.08   1 0.00000 0.00000 0.00000 0.00000 0.00000 0.00000
   3   0  -9 2798.50   47.62  -2 0.00000 0.00000 0.00000 0.00000 0.00000 0.00000
   6   0   0 2798.50   47.62   1 0.00000 0.00000 0.00000 0.00000 0.00000 0.00000
   4   0 -12  672.41   19.28  -2 0.00000 0.00000 0.00000 0.00000 0.00000 0.00000
   8   0   0  672.41   19.28   1 0.00000 0.00000 0.00000 0.00000 0.00000 0.00000
   5   0 -15   27.21   13.61  -2 0.00000 0.00000 0.00000 0.00000 0.00000 0.00000
  10   0   0   27.21   13.61   1 0.00000 0.00000 0.00000 0.00000 0.00000 0.00000
   1   1   0  276.68   12.47   1 0.00000 0.00000 0.00000 0.00000 0.00000 0.00000
  -1  -1   0  215.44   13.61   1 0.00000 0.00000 0.00000 0.00000 0.00000 0.00000
   1  -1  -3 4079.82   63.50  -2 0.00000 0.00000 0.00000 0.00000 0.00000 0.00000
   2   1   0 4079.82   63.50   1 0.00000 0.00000 0.00000 0.00000 0.00000 0.00000
  -1   1   3 4136.52   69.17  -2 0.00000 0.00000 0.00000 0.00000 0.00000 0.00000
  -2  -1   0 4136.52   69.17   1 0.00000 0.00000 0.00000 0.00000 0.00000 0.00000
  -3  -1   0  585.10   14.74   1 0.00000 0.00000 0.00000 0.00000 0.00000 0.00000
   3   1   0  556.75   15.87   1 0.00000 0.00000 0.00000 0.00000 0.00000 0.00000
   2  -1  -6 4886.04   74.84  -2 0.00000 0.00000 0.00000 0.00000 0.00000 0.00000
   4   1   0 4886.04   74.84   1 0.00000 0.00000 0.00000 0.00000 0.00000 0.00000
  -2   1   6 5050.45   77.11  -2 0.00000 0.00000 0.00000 0.00000 0.00000 0.00000
  -4  -1   0 5050.45   77.11   1 0.00000 0.00000 0.00000 0.00000 0.00000 0.00000
   3  -1  -9  230.18    9.07  -2 0.00000 0.00000 0.00000 0.00000 0.00000 0.00000
   6   1   0  230.18    9.07   1 0.00000 0.00000 0.00000 0.00000 0.00000 0.00000
  -3   1   9  232.45    9.07  -2 0.00000 0.00000 0.00000 0.00000 0.00000 0.00000
  -6  -1   0  232.45    9.07   1 0.00000 0.00000 0.00000 0.00000 0.00000 0.00000
   4  -1 -12  288.01   14.74  -2 0.00000 0.00000 0.00000 0.00000 0.00000 0.00000
   8   1   0  288.01   14.74   1 0.00000 0.00000 0.00000 0.00000 0.00000 0.00000
  -4   1  12  306.16   14.74  -2 0.00000 0.00000 0.00000 0.00000 0.00000 0.00000
  -8  -1   0  306.16   14.74   1 0.00000 0.00000 0.00000 0.00000 0.00000 0.00000
   0   2   0 9477.26  193.90  -2 0.00000 0.00000 0.00000 0.00000 0.00000 0.00000
   0  -2   0 9477.26  193.90   1 0.00000 0.00000 0.00000 0.00000 0.00000 0.00000
   1   2   0  774.46   29.48   1 0.00000 0.00000 0.00000 0.00000 0.00000 0.00000
  -1  -2   0  723.44   15.87   1 0.00000 0.00000 0.00000 0.00000 0.00000 0.00000
   1  -2  -3 1585.21   34.02  -2 0.00000 0.00000 0.00000 0.00000 0.00000 0.00000
   2   2   0 1585.21   34.02   1 0.00000 0.00000 0.00000 0.00000 0.00000 0.00000
  -1   2   3 1390.18   24.95  -2 0.00000 0.00000 0.00000 0.00000 0.00000 0.00000
  -2  -2   0 1390.18   24.95   1 0.00000 0.00000 0.00000 0.00000 0.00000 0.00000
  -2   2   6  219.98    6.80  -2 0.00000 0.00000 0.00000 0.00000 0.00000 0.00000
  -4  -2   0  219.98    6.80   1 0.00000 0.00000 0.00000 0.00000 0.00000 0.00000
   2  -2  -6  234.72    7.94  -2 0.00000 0.00000 0.00000 0.00000 0.00000 0.00000
   4   2   0  234.72    7.94   1 0.00000 0.00000 0.00000 0.00000 0.00000 0.00000
   3  -2  -9  779.00   23.81  -2 0.00000 0.00000 0.00000 0.00000 0.00000 0.00000
   6   2   0  779.00   23.81   1 0.00000 0.00000 0.00000 0.00000 0.00000 0.00000
  -3   2   9  769.93   18.14  -2 0.00000 0.00000 0.00000 0.00000 0.00000 0.00000
  -6  -2   0  769.93   18.14   1 0.00000 0.00000 0.00000 0.00000 0.00000 0.00000
   4  -2 -12  422.95   20.41  -2 0.00000 0.00000 0.00000 0.00000 0.00000 0.00000
   8   2   0  422.95   20.41   1 0.00000 0.00000 0.00000 0.00000 0.00000 0.00000
  -4   2  12  422.95   18.14  -2 0.00000 0.00000 0.00000 0.00000 0.00000 0.00000
  -8  -2   0  422.95   18.14   1 0.00000 0.00000 0.00000 0.00000 0.00000 0.00000
   1  -3  -3  188.23   10.21  -2 0.00000 0.00000 0.00000 0.00000 0.00000 0.00000
   2   3   0  188.23   10.21   1 0.00000 0.00000 0.00000 0.00000 0.00000 0.00000
  -1   3   3  184.83    5.67  -2 0.00000 0.00000 0.00000 0.00000 0.00000 0.00000
  -2  -3   0  184.83    5.67   1 0.00000 0.00000 0.00000 0.00000 0.00000 0.00000
   2  -3  -6  928.68   22.68  -2 0.00000 0.00000 0.00000 0.00000 0.00000 0.00000
   4   3   0  928.68   22.68   1 0.00000 0.00000 0.00000 0.00000 0.00000 0.00000
  -2   3   6  826.62   17.01  -2 0.00000 0.00000 0.00000 0.00000 0.00000 0.00000
  -4  -3   0  826.62   17.01   1 0.00000 0.00000 0.00000 0.00000 0.00000 0.00000
   3  -3  -9  344.71   15.87  -2 0.00000 0.00000 0.00000 0.00000 0.00000 0.00000
   6   3   0  344.71   15.87   1 0.00000 0.00000 0.00000 0.00000 0.00000 0.00000
  -3   3   9  295.95    9.07  -2 0.00000 0.00000 0.00000 0.00000 0.00000 0.00000
  -6  -3   0  295.95    9.07   1 0.00000 0.00000 0.00000 0.00000 0.00000 0.00000
   4  -3 -12   -2.27   13.61  -2 0.00000 0.00000 0.00000 0.00000 0.00000 0.00000
   8   3   0   -2.27   13.61   1 0.00000 0.00000 0.00000 0.00000 0.00000 0.00000
  -4   3  12   18.14   11.34  -2 0.00000 0.00000 0.00000 0.00000 0.00000 0.00000
  -8  -3   0   18.14   11.34   1 0.00000 0.00000 0.00000 0.00000 0.00000 0.00000
   0   4   0  336.77   10.21  -2 0.00000 0.00000 0.00000 0.00000 0.00000 0.00000
   0  -4   0  336.77   10.21   1 0.00000 0.00000 0.00000 0.00000 0.00000 0.00000
  -1   4   3  122.46    4.54  -2 0.00000 0.00000 0.00000 0.00000 0.00000 0.00000
  -2  -4   0  122.46    4.54   1 0.00000 0.00000 0.00000 0.00000 0.00000 0.00000
  -2   4   6  102.05    5.67  -2 0.00000 0.00000 0.00000 0.00000 0.00000 0.00000
  -4  -4   0  102.05    5.67   1 0.00000 0.00000 0.00000 0.00000 0.00000 0.00000
   2  -4  -6  117.93   12.47  -2 0.00000 0.00000 0.00000 0.00000 0.00000 0.00000
   4   4   0  117.93   12.47   1 0.00000 0.00000 0.00000 0.00000 0.00000 0.00000
   3  -4  -9    1.13   12.47  -2 0.00000 0.00000 0.00000 0.00000 0.00000 0.00000
   6   4   0    1.13   12.47   1 0.00000 0.00000 0.00000 0.00000 0.00000 0.00000
  -3   4   9   -1.13   11.34  -2 0.00000 0.00000 0.00000 0.00000 0.00000 0.00000
  -6  -4   0   -1.13   11.34   1 0.00000 0.00000 0.00000 0.00000 0.00000 0.00000
  -4   4  12  183.69   15.87  -2 0.00000 0.00000 0.00000 0.00000 0.00000 0.00000
  -8  -4   0  183.69   15.87   1 0.00000 0.00000 0.00000 0.00000 0.00000 0.00000
   4  -4 -12  151.94   28.35  -2 0.00000 0.00000 0.00000 0.00000 0.00000 0.00000
   8   4   0  151.94   28.35   1 0.00000 0.00000 0.00000 0.00000 0.00000 0.00000
  -1   5   3    2.27    3.40  -2 0.00000 0.00000 0.00000 0.00000 0.00000 0.00000
  -2  -5   0    2.27    3.40   1 0.00000 0.00000 0.00000 0.00000 0.00000 0.00000
  -2   5   6  141.74    5.67  -2 0.00000 0.00000 0.00000 0.00000 0.00000 0.00000
  -4  -5   0  141.74    5.67   1 0.00000 0.00000 0.00000 0.00000 0.00000 0.00000
   2  -5  -6  205.24   23.81  -2 0.00000 0.00000 0.00000 0.00000 0.00000 0.00000
   4   5   0  205.24   23.81   1 0.00000 0.00000 0.00000 0.00000 0.00000 0.00000
   3  -5  -9  176.89   19.28  -2 0.00000 0.00000 0.00000 0.00000 0.00000 0.00000
   6   5   0  176.89   19.28   1 0.00000 0.00000 0.00000 0.00000 0.00000 0.00000
  -3   5   9  217.71   11.34  -2 0.00000 0.00000 0.00000 0.00000 0.00000 0.00000
  -6  -5   0  217.71   11.34   1 0.00000 0.00000 0.00000 0.00000 0.00000 0.00000
   0   6   0  222.25    9.07  -2 0.00000 0.00000 0.00000 0.00000 0.00000 0.00000
   0  -6   0  222.25    9.07   1 0.00000 0.00000 0.00000 0.00000 0.00000 0.00000
  -1   6   3  104.32    5.67  -2 0.00000 0.00000 0.00000 0.00000 0.00000 0.00000
  -2  -6   0  104.32    5.67   1 0.00000 0.00000 0.00000 0.00000 0.00000 0.00000
  -2   6   6   36.29    4.54  -2 0.00000 0.00000 0.00000 0.00000 0.00000 0.00000
  -4  -6   0   36.29    4.54   1 0.00000 0.00000 0.00000 0.00000 0.00000 0.00000
  -3   6   9    7.94   11.34  -2 0.00000 0.00000 0.00000 0.00000 0.00000 0.00000
  -6  -6   0    7.94   11.34   1 0.00000 0.00000 0.00000 0.00000 0.00000 0.00000
  -1   7   3  260.80    9.07  -2 0.00000 0.00000 0.00000 0.00000 0.00000 0.00000
  -2  -7   0  260.80    9.07   1 0.00000 0.00000 0.00000 0.00000 0.00000 0.00000
  -2   7   6  408.21   19.28  -2 0.00000 0.00000 0.00000 0.00000 0.00000 0.00000
  -4  -7   0  408.21   19.28   1 0.00000 0.00000 0.00000 0.00000 0.00000 0.00000
   5   0 -13  116.79   12.47  -2 0.00000 0.00000 0.00000 0.00000 0.00000 0.00000
   9   0  -1  116.79   12.47   1 0.00000 0.00000 0.00000 0.00000 0.00000 0.00000
   4   0 -10   22.68    7.94  -2 0.00000 0.00000 0.00000 0.00000 0.00000 0.00000
   7   0  -1   22.68    7.94   1 0.00000 0.00000 0.00000 0.00000 0.00000 0.00000
   3   0  -7   81.64    6.80  -2 0.00000 0.00000 0.00000 0.00000 0.00000 0.00000
   5   0  -1   81.64    6.80   1 0.00000 0.00000 0.00000 0.00000 0.00000 0.00000
   2   0  -4  284.61    7.94  -2 0.00000 0.00000 0.00000 0.00000 0.00000 0.00000
   3   0  -1  284.61    7.94   1 0.00000 0.00000 0.00000 0.00000 0.00000 0.00000
   1   0  -1 1819.93   51.03  -2 0.00000 0.00000 0.00000 0.00000 0.00000 0.00000
   1   0  -1 1819.93   51.03   1 0.00000 0.00000 0.00000 0.00000 0.00000 0.00000
   0   0  -2  437.69   12.47  -2 0.00000 0.00000 0.00000 0.00000 0.00000 0.00000
   1   0   1  437.69   12.47   1 0.00000 0.00000 0.00000 0.00000 0.00000 0.00000
   1   0  -5  979.70   19.28  -2 0.00000 0.00000 0.00000 0.00000 0.00000 0.00000
   3   0   1  979.70   19.28   1 0.00000 0.00000 0.00000 0.00000 0.00000 0.00000
   2   0  -8 3560.49   56.70  -2 0.00000 0.00000 0.00000 0.00000 0.00000 0.00000
   5   0   1 3560.49   56.70   1 0.00000 0.00000 0.00000 0.00000 0.00000 0.00000
   3   0 -11  527.27   14.74  -2 0.00000 0.00000 0.00000 0.00000 0.00000 0.00000
   7   0   1  527.27   14.74   1 0.00000 0.00000 0.00000 0.00000 0.00000 0.00000
   4   0 -14  323.17   17.01  -2 0.00000 0.00000 0.00000 0.00000 0.00000 0.00000
   9   0   1  323.17   17.01   1 0.00000 0.00000 0.00000 0.00000 0.00000 0.00000
   5  -1 -13   34.02   11.34  -2 0.00000 0.00000 0.00000 0.00000 0.00000 0.00000
   9   1  -1   34.02   11.34   1 0.00000 0.00000 0.00000 0.00000 0.00000 0.00000
  -5   1  13   21.54   11.34  -2 0.00000 0.00000 0.00000 0.00000 0.00000 0.00000
  -9  -1   1   21.54   11.34   1 0.00000 0.00000 0.00000 0.00000 0.00000 0.00000
   4  -1 -10   39.69    7.94  -2 0.00000 0.00000 0.00000 0.00000 0.00000 0.00000
   7   1  -1   39.69    7.94   1 0.00000 0.00000 0.00000 0.00000 0.00000 0.00000
  -4   1  10   45.36    9.07  -2 0.00000 0.00000 0.00000 0.00000 0.00000 0.00000
  -7  -1   1   45.36    9.07   1 0.00000 0.00000 0.00000 0.00000 0.00000 0.00000
   3  -1  -7    3.40    4.54  -2 0.00000 0.00000 0.00000 0.00000 0.00000 0.00000
   5   1  -1    3.40    4.54   1 0.00000 0.00000 0.00000 0.00000 0.00000 0.00000
  -3   1   7    6.80    4.54  -2 0.00000 0.00000 0.00000 0.00000 0.00000 0.00000
  -5  -1   1    6.80    4.54   1 0.00000 0.00000 0.00000 0.00000 0.00000 0.00000
   2  -1  -4   57.83    4.54  -2 0.00000 0.00000 0.00000 0.00000 0.00000 0.00000
   3   1  -1   57.83    4.54   1 0.00000 0.00000 0.00000 0.00000 0.00000 0.00000
  -2   1   4   57.83    3.40  -2 0.00000 0.00000 0.00000 0.00000 0.00000 0.00000
  -3  -1   1   57.83    3.40   1 0.00000 0.00000 0.00000 0.00000 0.00000 0.00000
  -2  -1   1  548.81   17.01   1 0.00000 0.00000 0.00000 0.00000 0.00000 0.00000
   2   1  -1  543.14   19.28   1 0.00000 0.00000 0.00000 0.00000 0.00000 0.00000
   1  -1  -1  260.80   17.01  -2 0.00000 0.00000 0.00000 0.00000 0.00000 0.00000
   1   1  -1  260.80   17.01   1 0.00000 0.00000 0.00000 0.00000 0.00000 0.00000
  -1   1   1  255.13   15.87  -2 0.00000 0.00000 0.00000 0.00000 0.00000 0.00000
  -1  -1   1  255.13   15.87   1 0.00000 0.00000 0.00000 0.00000 0.00000 0.00000
   0  -1  -1   28.35    2.27   1 0.00000 0.00000 0.00000 0.00000 0.00000 0.00000
   0   1   2 2865.40  102.05  -2 0.00000 0.00000 0.00000 0.00000 0.00000 0.00000
  -1  -1  -1 2865.40  102.05   1 0.00000 0.00000 0.00000 0.00000 0.00000 0.00000
   0  -1  -2 2782.63   73.70  -2 0.00000 0.00000 0.00000 0.00000 0.00000 0.00000
   1   1   1 2782.63   73.70   1 0.00000 0.00000 0.00000 0.00000 0.00000 0.00000
  -2  -1  -1  464.90   11.34   1 0.00000 0.00000 0.00000 0.00000 0.00000 0.00000
   2   1   1  458.10   12.47   1 0.00000 0.00000 0.00000 0.00000 0.00000 0.00000
  -1   1   5 1057.94   19.28  -2 0.00000 0.00000 0.00000 0.00000 0.00000 0.00000
  -3  -1  -1 1057.94   19.28   1 0.00000 0.00000 0.00000 0.00000 0.00000 0.00000
   1  -1  -5 1088.56   20.41  -2 0.00000 0.00000 0.00000 0.00000 0.00000 0.00000
   3   1   1 1088.56   20.41   1 0.00000 0.00000 0.00000 0.00000 0.00000 0.00000
  -2   1   8  173.49    7.94  -2 0.00000 0.00000 0.00000 0.00000 0.00000 0.00000
  -5  -1  -1  173.49    7.94   1 0.00000 0.00000 0.00000 0.00000 0.00000 0.00000
   2  -1  -8  167.82    7.94  -2 0.00000 0.00000 0.00000 0.00000 0.00000 0.00000
   5   1   1  167.82    7.94   1 0.00000 0.00000 0.00000 0.00000 0.00000 0.00000
   3  -1 -11  831.16   20.41  -2 0.00000 0.00000 0.00000 0.00000 0.00000 0.00000
   7   1   1  831.16   20.41   1 0.00000 0.00000 0.00000 0.00000 0.00000 0.00000
  -3   1  11  802.81   20.41  -2 0.00000 0.00000 0.00000 0.00000 0.00000 0.00000
  -7  -1  -1  802.81   20.41   1 0.00000 0.00000 0.00000 0.00000 0.00000 0.00000
   4  -1 -14  574.89   24.95  -2 0.00000 0.00000 0.00000 0.00000 0.00000 0.00000
   9   1   1  574.89   24.95   1 0.00000 0.00000 0.00000 0.00000 0.00000 0.00000
  -4   1  14  559.02   20.41  -2 0.00000 0.00000 0.00000 0.00000 0.00000 0.00000
  -9  -1  -1  559.02   20.41   1 0.00000 0.00000 0.00000 0.00000 0.00000 0.00000
   5  -2 -13   20.41    9.07  -2 0.00000 0.00000 0.00000 0.00000 0.00000 0.00000
   9   2  -1   20.41    9.07   1 0.00000 0.00000 0.00000 0.00000 0.00000 0.00000
  -5   2  13   21.54   12.47  -2 0.00000 0.00000 0.00000 0.00000 0.00000 0.00000
  -9  -2   1   21.54   12.47   1 0.00000 0.00000 0.00000 0.00000 0.00000 0.00000
  -4   2  10  184.83   12.47  -2 0.00000 0.00000 0.00000 0.00000 0.00000 0.00000
  -7  -2   1  184.83   12.47   1 0.00000 0.00000 0.00000 0.00000 0.00000 0.00000
   4  -2 -10  146.27   12.47  -2 0.00000 0.00000 0.00000 0.00000 0.00000 0.00000
   7   2  -1  146.27   12.47   1 0.00000 0.00000 0.00000 0.00000 0.00000 0.00000
  -3   2   7  316.36   11.34  -2 0.00000 0.00000 0.00000 0.00000 0.00000 0.00000
  -5  -2   1  316.36   11.34   1 0.00000 0.00000 0.00000 0.00000 0.00000 0.00000
   3  -2  -7  266.47   11.34  -2 0.00000 0.00000 0.00000 0.00000 0.00000 0.00000
   5   2  -1  266.47   11.34   1 0.00000 0.00000 0.00000 0.00000 0.00000 0.00000
   2  -2  -4  669.01   20.41  -2 0.00000 0.00000 0.00000 0.00000 0.00000 0.00000
   3   2  -1  669.01   20.41   1 0.00000 0.00000 0.00000 0.00000 0.00000 0.00000
  -2   2   4  621.39   13.61  -2 0.00000 0.00000 0.00000 0.00000 0.00000 0.00000
  -3  -2   1  621.39   13.61   1 0.00000 0.00000 0.00000 0.00000 0.00000 0.00000
  -2  -2   1   64.63    3.40   1 0.00000 0.00000 0.00000 0.00000 0.00000 0.00000
   2   2  -1   69.17    6.80   1 0.00000 0.00000 0.00000 0.00000 0.00000 0.00000
  -1   2   1   77.11    4.54  -2 0.00000 0.00000 0.00000 0.00000 0.00000 0.00000
  -1  -2   1   77.11    4.54   1 0.00000 0.00000 0.00000 0.00000 0.00000 0.00000
   1  -2  -1   91.85    6.80  -2 0.00000 0.00000 0.00000 0.00000 0.00000 0.00000
   1   2  -1   91.85    6.80   1 0.00000 0.00000 0.00000 0.00000 0.00000 0.00000
   0  -2  -1  858.37   18.14   1 0.00000 0.00000 0.00000 0.00000 0.00000 0.00000
   0   2   1  944.55   51.03   1 0.00000 0.00000 0.00000 0.00000 0.00000 0.00000
   0  -2  -2  371.92   12.47  -2 0.00000 0.00000 0.00000 0.00000 0.00000 0.00000
   1   2   1  371.92   12.47   1 0.00000 0.00000 0.00000 0.00000 0.00000 0.00000
   0   2   2  351.51    9.07  -2 0.00000 0.00000 0.00000 0.00000 0.00000 0.00000
  -1  -2  -1  351.51    9.07   1 0.00000 0.00000 0.00000 0.00000 0.00000 0.00000
  -2  -2  -1  278.94    7.94   1 0.00000 0.00000 0.00000 0.00000 0.00000 0.00000
   2   2   1  311.83   11.34   1 0.00000 0.00000 0.00000 0.00000 0.00000 0.00000
   1  -2  -5 1110.10   21.54  -2 0.00000 0.00000 0.00000 0.00000 0.00000 0.00000
   3   2   1 1110.10   21.54   1 0.00000 0.00000 0.00000 0.00000 0.00000 0.00000
  -1   2   5 1074.95   19.28  -2 0.00000 0.00000 0.00000 0.00000 0.00000 0.00000
  -3  -2  -1 1074.95   19.28   1 0.00000 0.00000 0.00000 0.00000 0.00000 0.00000
  -2   2   8 1097.63   22.68  -2 0.00000 0.00000 0.00000 0.00000 0.00000 0.00000
  -5  -2  -1 1097.63   22.68   1 0.00000 0.00000 0.00000 0.00000 0.00000 0.00000
   2  -2  -8 1195.15   26.08  -2 0.00000 0.00000 0.00000 0.00000 0.00000 0.00000
   5   2   1 1195.15   26.08   1 0.00000 0.00000 0.00000 0.00000 0.00000 0.00000
  -3   2  11   49.89    6.80  -2 0.00000 0.00000 0.00000 0.00000 0.00000 0.00000
  -7  -2  -1   49.89    6.80   1 0.00000 0.00000 0.00000 0.00000 0.00000 0.00000
   3  -2 -11   51.03    9.07  -2 0.00000 0.00000 0.00000 0.00000 0.00000 0.00000
   7   2   1   51.03    9.07   1 0.00000 0.00000 0.00000 0.00000 0.00000 0.00000
  -4   2  14  173.49   13.61  -2 0.00000 0.00000 0.00000 0.00000 0.00000 0.00000
  -9  -2  -1  173.49   13.61   1 0.00000 0.00000 0.00000 0.00000 0.00000 0.00000
   4  -2 -14  196.17   17.01  -2 0.00000 0.00000 0.00000 0.00000 0.00000 0.00000
   9   2   1  196.17   17.01   1 0.00000 0.00000 0.00000 0.00000 0.00000 0.00000
  -5   3  13  274.41   15.87  -2 0.00000 0.00000 0.00000 0.00000 0.00000 0.00000
  -9  -3   1  274.41   15.87   1 0.00000 0.00000 0.00000 0.00000 0.00000 0.00000
  -4   3  10  576.03   18.14  -2 0.00000 0.00000 0.00000 0.00000 0.00000 0.00000
  -7  -3   1  576.03   18.14   1 0.00000 0.00000 0.00000 0.00000 0.00000 0.00000
   4  -3 -10  594.17   17.01  -2 0.00000 0.00000 0.00000 0.00000 0.00000 0.00000
   7   3  -1  594.17   17.01   1 0.00000 0.00000 0.00000 0.00000 0.00000 0.00000
  -3   3   7    5.67    6.80  -2 0.00000 0.00000 0.00000 0.00000 0.00000 0.00000
  -5  -3   1    5.67    6.80   1 0.00000 0.00000 0.00000 0.00000 0.00000 0.00000
   3  -3  -7   22.68   10.21  -2 0.00000 0.00000 0.00000 0.00000 0.00000 0.00000
   5   3  -1   22.68   10.21   1 0.00000 0.00000 0.00000 0.00000 0.00000 0.00000
   2  -3  -4 2105.68   51.03  -2 0.00000 0.00000 0.00000 0.00000 0.00000 0.00000
   3   3  -1 2105.68   51.03   1 0.00000 0.00000 0.00000 0.00000 0.00000 0.00000
  -2   3   4 1894.77   31.75  -2 0.00000 0.00000 0.00000 0.00000 0.00000 0.00000
  -3  -3   1 1894.77   31.75   1 0.00000 0.00000 0.00000 0.00000 0.00000 0.00000
   1  -3  -1 2398.23   99.78  -2 0.00000 0.00000 0.00000 0.00000 0.00000 0.00000
   1   3  -1 2398.23   99.78   1 0.00000 0.00000 0.00000 0.00000 0.00000 0.00000
  -1   3   1 2315.45   34.02  -2 0.00000 0.00000 0.00000 0.00000 0.00000 0.00000
  -1  -3   1 2315.45   34.02   1 0.00000 0.00000 0.00000 0.00000 0.00000 0.00000
   0  -3  -2  730.24   41.95  -2 0.00000 0.00000 0.00000 0.00000 0.00000 0.00000
   1   3   1  730.24   41.95   1 0.00000 0.00000 0.00000 0.00000 0.00000 0.00000
   0   3   2  705.29   12.47  -2 0.00000 0.00000 0.00000 0.00000 0.00000 0.00000
  -1  -3  -1  705.29   12.47   1 0.00000 0.00000 0.00000 0.00000 0.00000 0.00000
  -1   3   5  181.43    5.67  -2 0.00000 0.00000 0.00000 0.00000 0.00000 0.00000
  -3  -3  -1  181.43    5.67   1 0.00000 0.00000 0.00000 0.00000 0.00000 0.00000
   1  -3  -5  217.71    9.07  -2 0.00000 0.00000 0.00000 0.00000 0.00000 0.00000
   3   3   1  217.71    9.07   1 0.00000 0.00000 0.00000 0.00000 0.00000 0.00000
  -2   3   8  744.98   15.87  -2 0.00000 0.00000 0.00000 0.00000 0.00000 0.00000
  -5  -3  -1  744.98   15.87   1 0.00000 0.00000 0.00000 0.00000 0.00000 0.00000
   2  -3  -8  761.99   20.41  -2 0.00000 0.00000 0.00000 0.00000 0.00000 0.00000
   5   3   1  761.99   20.41   1 0.00000 0.00000 0.00000 0.00000 0.00000 0.00000
   3  -3 -11  129.27   12.47  -2 0.00000 0.00000 0.00000 0.00000 0.00000 0.00000
   7   3   1  129.27   12.47   1 0.00000 0.00000 0.00000 0.00000 0.00000 0.00000
  -3   3  11  175.76    9.07  -2 0.00000 0.00000 0.00000 0.00000 0.00000 0.00000
  -7  -3  -1  175.76    9.07   1 0.00000 0.00000 0.00000 0.00000 0.00000 0.00000
  -4   3  14   26.08   14.74  -2 0.00000 0.00000 0.00000 0.00000 0.00000 0.00000
  -9  -3  -1   26.08   14.74   1 0.00000 0.00000 0.00000 0.00000 0.00000 0.00000
   4  -3 -14    3.40   26.08  -2 0.00000 0.00000 0.00000 0.00000 0.00000 0.00000
   9   3   1    3.40   26.08   1 0.00000 0.00000 0.00000 0.00000 0.00000 0.00000
  -4   4  10  504.59   18.14  -2 0.00000 0.00000 0.00000 0.00000 0.00000 0.00000
  -7  -4   1  504.59   18.14   1 0.00000 0.00000 0.00000 0.00000 0.00000 0.00000
   4  -4 -10  401.41   23.81  -2 0.00000 0.00000 0.00000 0.00000 0.00000 0.00000
   7   4  -1  401.41   23.81   1 0.00000 0.00000 0.00000 0.00000 0.00000 0.00000
   3  -4  -7 1959.40   53.29  -2 0.00000 0.00000 0.00000 0.00000 0.00000 0.00000
   5   4  -1 1959.40   53.29   1 0.00000 0.00000 0.00000 0.00000 0.00000 0.00000
  -3   4   7 1872.09   43.09  -2 0.00000 0.00000 0.00000 0.00000 0.00000 0.00000
  -5  -4   1 1872.09   43.09   1 0.00000 0.00000 0.00000 0.00000 0.00000 0.00000
   2  -4  -4 1084.02   41.95  -2 0.00000 0.00000 0.00000 0.00000 0.00000 0.00000
   3   4  -1 1084.02   41.95   1 0.00000 0.00000 0.00000 0.00000 0.00000 0.00000
  -2   4   4  992.18   19.28  -2 0.00000 0.00000 0.00000 0.00000 0.00000 0.00000
  -3  -4   1  992.18   19.28   1 0.00000 0.00000 0.00000 0.00000 0.00000 0.00000
  -1   4   1  607.78   12.47  -2 0.00000 0.00000 0.00000 0.00000 0.00000 0.00000
  -1  -4   1  607.78   12.47   1 0.00000 0.00000 0.00000 0.00000 0.00000 0.00000
   0   4   2 2925.50   40.82  -2 0.00000 0.00000 0.00000 0.00000 0.00000 0.00000
  -1  -4  -1 2925.50   40.82   1 0.00000 0.00000 0.00000 0.00000 0.00000 0.00000
   1  -4  -5  942.28   37.42  -2 0.00000 0.00000 0.00000 0.00000 0.00000 0.00000
   3   4   1  942.28   37.42   1 0.00000 0.00000 0.00000 0.00000 0.00000 0.00000
  -1   4   5  830.03   17.01  -2 0.00000 0.00000 0.00000 0.00000 0.00000 0.00000
  -3  -4  -1  830.03   17.01   1 0.00000 0.00000 0.00000 0.00000 0.00000 0.00000
  -2   4   8   -1.13    7.94  -2 0.00000 0.00000 0.00000 0.00000 0.00000 0.00000
  -5  -4  -1   -1.13    7.94   1 0.00000 0.00000 0.00000 0.00000 0.00000 0.00000
   2  -4  -8    2.27    5.67  -2 0.00000 0.00000 0.00000 0.00000 0.00000 0.00000
   5   4   1    2.27    5.67   1 0.00000 0.00000 0.00000 0.00000 0.00000 0.00000
  -3   4  11  103.19   10.21  -2 0.00000 0.00000 0.00000 0.00000 0.00000 0.00000
  -7  -4  -1  103.19   10.21   1 0.00000 0.00000 0.00000 0.00000 0.00000 0.00000
   3  -4 -11   74.84   14.74  -2 0.00000 0.00000 0.00000 0.00000 0.00000 0.00000
   7   4   1   74.84   14.74   1 0.00000 0.00000 0.00000 0.00000 0.00000 0.00000
  -4   5  10  531.81   22.68  -2 0.00000 0.00000 0.00000 0.00000 0.00000 0.00000
  -7  -5   1  531.81   22.68   1 0.00000 0.00000 0.00000 0.00000 0.00000 0.00000
   4  -5 -10  513.66   64.63  -2 0.00000 0.00000 0.00000 0.00000 0.00000 0.00000
   7   5  -1  513.66   64.63   1 0.00000 0.00000 0.00000 0.00000 0.00000 0.00000
  -3   5   7   24.95    5.67  -2 0.00000 0.00000 0.00000 0.00000 0.00000 0.00000
  -5  -5   1   24.95    5.67   1 0.00000 0.00000 0.00000 0.00000 0.00000 0.00000
   3  -5  -7   31.75   18.14  -2 0.00000 0.00000 0.00000 0.00000 0.00000 0.00000
   5   5  -1   31.75   18.14   1 0.00000 0.00000 0.00000 0.00000 0.00000 0.00000
   2  -5  -4 2145.37  107.72  -2 0.00000 0.00000 0.00000 0.00000 0.00000 0.00000
   3   5  -1 2145.37  107.72   1 0.00000 0.00000 0.00000 0.00000 0.00000 0.00000
  -2   5   4 1822.20   26.08  -2 0.00000 0.00000 0.00000 0.00000 0.00000 0.00000
  -3  -5   1 1822.20   26.08   1 0.00000 0.00000 0.00000 0.00000 0.00000 0.00000
  -1   5   1 2073.93   27.21  -2 0.00000 0.00000 0.00000 0.00000 0.00000 0.00000
  -1  -5   1 2073.93   27.21   1 0.00000 0.00000 0.00000 0.00000 0.00000 0.00000
   0   5   2  208.64    6.80  -2 0.00000 0.00000 0.00000 0.00000 0.00000 0.00000
  -1  -5  -1  208.64    6.80   1 0.00000 0.00000 0.00000 0.00000 0.00000 0.00000
   1  -5  -5  427.49   35.15  -2 0.00000 0.00000 0.00000 0.00000 0.00000 0.00000
   3   5   1  427.49   35.15   1 0.00000 0.00000 0.00000 0.00000 0.00000 0.00000
  -1   5   5  470.57   10.21  -2 0.00000 0.00000 0.00000 0.00000 0.00000 0.00000
  -3  -5  -1  470.57   10.21   1 0.00000 0.00000 0.00000 0.00000 0.00000 0.00000
  -2   5   8  693.96   14.74  -2 0.00000 0.00000 0.00000 0.00000 0.00000 0.00000
  -5  -5  -1  693.96   14.74   1 0.00000 0.00000 0.00000 0.00000 0.00000 0.00000
   2  -5  -8  624.79   34.02  -2 0.00000 0.00000 0.00000 0.00000 0.00000 0.00000
   5   5   1  624.79   34.02   1 0.00000 0.00000 0.00000 0.00000 0.00000 0.00000
  -3   5  11   51.03   13.61  -2 0.00000 0.00000 0.00000 0.00000 0.00000 0.00000
  -7  -5  -1   51.03   13.61   1 0.00000 0.00000 0.00000 0.00000 0.00000 0.00000
   3  -5 -11   27.21   21.54  -2 0.00000 0.00000 0.00000 0.00000 0.00000 0.00000
   7   5   1   27.21   21.54   1 0.00000 0.00000 0.00000 0.00000 0.00000 0.00000
  -3   6   7  767.66   21.54  -2 0.00000 0.00000 0.00000 0.00000 0.00000 0.00000
  -5  -6   1  767.66   21.54   1 0.00000 0.00000 0.00000 0.00000 0.00000 0.00000
   3  -6  -7  876.52   71.44  -2 0.00000 0.00000 0.00000 0.00000 0.00000 0.00000
   5   6  -1  876.52   71.44   1 0.00000 0.00000 0.00000 0.00000 0.00000 0.00000
  -2   6   4  453.57    9.07  -2 0.00000 0.00000 0.00000 0.00000 0.00000 0.00000
  -3  -6   1  453.57    9.07   1 0.00000 0.00000 0.00000 0.00000 0.00000 0.00000
  -1   6   1  175.76    5.67  -2 0.00000 0.00000 0.00000 0.00000 0.00000 0.00000
  -1  -6   1  175.76    5.67   1 0.00000 0.00000 0.00000 0.00000 0.00000 0.00000
   0   6   2 1208.75   20.41  -2 0.00000 0.00000 0.00000 0.00000 0.00000 0.00000
  -1  -6  -1 1208.75   20.41   1 0.00000 0.00000 0.00000 0.00000 0.00000 0.00000
  -1   6   5  384.40   10.21  -2 0.00000 0.00000 0.00000 0.00000 0.00000 0.00000
  -3  -6  -1  384.40   10.21   1 0.00000 0.00000 0.00000 0.00000 0.00000 0.00000
  -2   6   8   17.01    5.67  -2 0.00000 0.00000 0.00000 0.00000 0.00000 0.00000
  -5  -6  -1   17.01    5.67   1 0.00000 0.00000 0.00000 0.00000 0.00000 0.00000
  -2   7   4  161.02    9.07  -2 0.00000 0.00000 0.00000 0.00000 0.00000 0.00000
  -3  -7   1  161.02    9.07   1 0.00000 0.00000 0.00000 0.00000 0.00000 0.00000
  -1   7   1  260.80    7.94  -2 0.00000 0.00000 0.00000 0.00000 0.00000 0.00000
  -1  -7   1  260.80    7.94   1 0.00000 0.00000 0.00000 0.00000 0.00000 0.00000
   0   7   2  280.08    9.07  -2 0.00000 0.00000 0.00000 0.00000 0.00000 0.00000
  -1  -7  -1  280.08    9.07   1 0.00000 0.00000 0.00000 0.00000 0.00000 0.00000
  -1   7   5    3.40    7.94  -2 0.00000 0.00000 0.00000 0.00000 0.00000 0.00000
  -3  -7  -1    3.40    7.94   1 0.00000 0.00000 0.00000 0.00000 0.00000 0.00000
   6   0 -14  597.57   29.48  -2 0.00000 0.00000 0.00000 0.00000 0.00000 0.00000
  10   0  -2  597.57   29.48   1 0.00000 0.00000 0.00000 0.00000 0.00000 0.00000
   5   0 -11  395.74   19.28  -2 0.00000 0.00000 0.00000 0.00000 0.00000 0.00000
   8   0  -2  395.74   19.28   1 0.00000 0.00000 0.00000 0.00000 0.00000 0.00000
   4   0  -8  341.31   13.61  -2 0.00000 0.00000 0.00000 0.00000 0.00000 0.00000
   6   0  -2  341.31   13.61   1 0.00000 0.00000 0.00000 0.00000 0.00000 0.00000
   3   0  -5 4298.67   77.11  -2 0.00000 0.00000 0.00000 0.00000 0.00000 0.00000
   4   0  -2 4298.67   77.11   1 0.00000 0.00000 0.00000 0.00000 0.00000 0.00000
   2   0  -2 5909.96  113.39  -2 0.00000 0.00000 0.00000 0.00000 0.00000 0.00000
   2   0  -2 5909.96  113.39   1 0.00000 0.00000 0.00000 0.00000 0.00000 0.00000
   0   0  -4 2341.53   35.15  -2 0.00000 0.00000 0.00000 0.00000 0.00000 0.00000
   2   0   2 2341.53   35.15   1 0.00000 0.00000 0.00000 0.00000 0.00000 0.00000
   1   0  -7  232.45    6.80  -2 0.00000 0.00000 0.00000 0.00000 0.00000 0.00000
   4   0   2  232.45    6.80   1 0.00000 0.00000 0.00000 0.00000 0.00000 0.00000
   2   0 -10   10.21    5.67  -2 0.00000 0.00000 0.00000 0.00000 0.00000 0.00000
   6   0   2   10.21    5.67   1 0.00000 0.00000 0.00000 0.00000 0.00000 0.00000
   3   0 -13   -3.40    7.94  -2 0.00000 0.00000 0.00000 0.00000 0.00000 0.00000
   8   0   2   -3.40    7.94   1 0.00000 0.00000 0.00000 0.00000 0.00000 0.00000
   5  -1 -11  681.48   23.81  -2 0.00000 0.00000 0.00000 0.00000 0.00000 0.00000
   8   1  -2  681.48   23.81   1 0.00000 0.00000 0.00000 0.00000 0.00000 0.00000
  -5   1  11  600.97   21.54  -2 0.00000 0.00000 0.00000 0.00000 0.00000 0.00000
  -8  -1   2  600.97   21.54   1 0.00000 0.00000 0.00000 0.00000 0.00000 0.00000
  -4   1   8 1756.43   37.42  -2 0.00000 0.00000 0.00000 0.00000 0.00000 0.00000
  -6  -1   2 1756.43   37.42   1 0.00000 0.00000 0.00000 0.00000 0.00000 0.00000
   4  -1  -8 1850.55   39.69  -2 0.00000 0.00000 0.00000 0.00000 0.00000 0.00000
   6   1  -2 1850.55   39.69   1 0.00000 0.00000 0.00000 0.00000 0.00000 0.00000
  -3   1   5  208.64    7.94  -2 0.00000 0.00000 0.00000 0.00000 0.00000 0.00000
  -4  -1   2  208.64    7.94   1 0.00000 0.00000 0.00000 0.00000 0.00000 0.00000
   3  -1  -5  207.51   10.21  -2 0.00000 0.00000 0.00000 0.00000 0.00000 0.00000
   4   1  -2  207.51   10.21   1 0.00000 0.00000 0.00000 0.00000 0.00000 0.00000
  -3  -1   2  305.02   11.34   1 0.00000 0.00000 0.00000 0.00000 0.00000 0.00000
   3   1  -2  291.42   13.61   1 0.00000 0.00000 0.00000 0.00000 0.00000 0.00000
   2  -1  -2  277.81   14.74  -2 0.00000 0.00000 0.00000 0.00000 0.00000 0.00000
   2   1  -2  277.81   14.74   1 0.00000 0.00000 0.00000 0.00000 0.00000 0.00000
  -2   1   2  294.82   12.47  -2 0.00000 0.00000 0.00000 0.00000 0.00000 0.00000
  -2  -1   2  294.82   12.47   1 0.00000 0.00000 0.00000 0.00000 0.00000 0.00000
   1   1  -2  502.32   14.74   1 0.00000 0.00000 0.00000 0.00000 0.00000 0.00000
  -1  -1   2  485.32    9.07   1 0.00000 0.00000 0.00000 0.00000 0.00000 0.00000
  -1  -1  -1 3202.17  120.19  -2 0.00000 0.00000 0.00000 0.00000 0.00000 0.00000
   0   1   2 3202.17  120.19   1 0.00000 0.00000 0.00000 0.00000 0.00000 0.00000
   1   1   2   43.09    6.80   1 0.00000 0.00000 0.00000 0.00000 0.00000 0.00000
  -1  -1  -2   26.08    2.27   1 0.00000 0.00000 0.00000 0.00000 0.00000 0.00000
   0   1   4 3269.08   51.03  -2 0.00000 0.00000 0.00000 0.00000 0.00000 0.00000
  -2  -1  -2 3269.08   51.03   1 0.00000 0.00000 0.00000 0.00000 0.00000 0.00000
   0  -1  -4 3444.83   54.43  -2 0.00000 0.00000 0.00000 0.00000 0.00000 0.00000
   2   1   2 3444.83   54.43   1 0.00000 0.00000 0.00000 0.00000 0.00000 0.00000
   3   1   2  462.64   12.47   1 0.00000 0.00000 0.00000 0.00000 0.00000 0.00000
  -3  -1  -2  444.49   11.34   1 0.00000 0.00000 0.00000 0.00000 0.00000 0.00000
  -1   1   7    0.00    5.67  -2 0.00000 0.00000 0.00000 0.00000 0.00000 0.00000
  -4  -1  -2    0.00    5.67   1 0.00000 0.00000 0.00000 0.00000 0.00000 0.00000
   1  -1  -7    0.00    4.54  -2 0.00000 0.00000 0.00000 0.00000 0.00000 0.00000
   4   1   2    0.00    4.54   1 0.00000 0.00000 0.00000 0.00000 0.00000 0.00000
   2  -1 -10   77.11    6.80  -2 0.00000 0.00000 0.00000 0.00000 0.00000 0.00000
   6   1   2   77.11    6.80   1 0.00000 0.00000 0.00000 0.00000 0.00000 0.00000
  -2   1  10   71.44    6.80  -2 0.00000 0.00000 0.00000 0.00000 0.00000 0.00000
  -6  -1  -2   71.44    6.80   1 0.00000 0.00000 0.00000 0.00000 0.00000 0.00000
  -3   1  13   23.81    7.94  -2 0.00000 0.00000 0.00000 0.00000 0.00000 0.00000
  -8  -1  -2   23.81    7.94   1 0.00000 0.00000 0.00000 0.00000 0.00000 0.00000
   3  -1 -13   22.68    9.07  -2 0.00000 0.00000 0.00000 0.00000 0.00000 0.00000
   8   1   2   22.68    9.07   1 0.00000 0.00000 0.00000 0.00000 0.00000 0.00000
  -5   2  11  238.12   13.61  -2 0.00000 0.00000 0.00000 0.00000 0.00000 0.00000
  -8  -2   2  238.12   13.61   1 0.00000 0.00000 0.00000 0.00000 0.00000 0.00000
   5  -2 -11  182.56   11.34  -2 0.00000 0.00000 0.00000 0.00000 0.00000 0.00000
   8   2  -2  182.56   11.34   1 0.00000 0.00000 0.00000 0.00000 0.00000 0.00000
  -4   2   8    6.80    7.94  -2 0.00000 0.00000 0.00000 0.00000 0.00000 0.00000
  -6  -2   2    6.80    7.94   1 0.00000 0.00000 0.00000 0.00000 0.00000 0.00000
   4  -2  -8    0.00   10.21  -2 0.00000 0.00000 0.00000 0.00000 0.00000 0.00000
   6   2  -2    0.00   10.21   1 0.00000 0.00000 0.00000 0.00000 0.00000 0.00000
  -3   2   5 1186.07   26.08  -2 0.00000 0.00000 0.00000 0.00000 0.00000 0.00000
  -4  -2   2 1186.07   26.08   1 0.00000 0.00000 0.00000 0.00000 0.00000 0.00000
   3  -2  -5 1220.09   22.68  -2 0.00000 0.00000 0.00000 0.00000 0.00000 0.00000
   4   2  -2 1220.09   22.68   1 0.00000 0.00000 0.00000 0.00000 0.00000 0.00000
  -2   2   2 3924.48   58.96  -2 0.00000 0.00000 0.00000 0.00000 0.00000 0.00000
  -2  -2   2 3924.48   58.96   1 0.00000 0.00000 0.00000 0.00000 0.00000 0.00000
   2  -2  -2 4054.88  117.93  -2 0.00000 0.00000 0.00000 0.00000 0.00000 0.00000
   2   2  -2 4054.88  117.93   1 0.00000 0.00000 0.00000 0.00000 0.00000 0.00000
  -1  -2   2  232.45    6.80   1 0.00000 0.00000 0.00000 0.00000 0.00000 0.00000
   1   2  -2  252.86   10.21   1 0.00000 0.00000 0.00000 0.00000 0.00000 0.00000
  -1  -2  -1  365.12   11.34  -2 0.00000 0.00000 0.00000 0.00000 0.00000 0.00000
   0   2   2  365.12   11.34   1 0.00000 0.00000 0.00000 0.00000 0.00000 0.00000
   1   2   1  353.78   10.21  -2 0.00000 0.00000 0.00000 0.00000 0.00000 0.00000
   0  -2  -2  353.78   10.21   1 0.00000 0.00000 0.00000 0.00000 0.00000 0.00000
   1   2   2  825.49   28.35   1 0.00000 0.00000 0.00000 0.00000 0.00000 0.00000
  -1  -2  -2  786.94   17.01   1 0.00000 0.00000 0.00000 0.00000 0.00000 0.00000
   0   2   4  243.79    6.80  -2 0.00000 0.00000 0.00000 0.00000 0.00000 0.00000
  -2  -2  -2  243.79    6.80   1 0.00000 0.00000 0.00000 0.00000 0.00000 0.00000
   0  -2  -4  246.06    7.94  -2 0.00000 0.00000 0.00000 0.00000 0.00000 0.00000
   2   2   2  246.06    7.94   1 0.00000 0.00000 0.00000 0.00000 0.00000 0.00000
   1  -2  -7  581.70   13.61  -2 0.00000 0.00000 0.00000 0.00000 0.00000 0.00000
   4   2   2  581.70   13.61   1 0.00000 0.00000 0.00000 0.00000 0.00000 0.00000
  -1   2   7  534.07   11.34  -2 0.00000 0.00000 0.00000 0.00000 0.00000 0.00000
  -4  -2  -2  534.07   11.34   1 0.00000 0.00000 0.00000 0.00000 0.00000 0.00000
   2  -2 -10  506.86   15.87  -2 0.00000 0.00000 0.00000 0.00000 0.00000 0.00000
   6   2   2  506.86   15.87   1 0.00000 0.00000 0.00000 0.00000 0.00000 0.00000
  -2   2  10  513.66   13.61  -2 0.00000 0.00000 0.00000 0.00000 0.00000 0.00000
  -6  -2  -2  513.66   13.61   1 0.00000 0.00000 0.00000 0.00000 0.00000 0.00000
   3  -2 -13   52.16   11.34  -2 0.00000 0.00000 0.00000 0.00000 0.00000 0.00000
   8   2   2   52.16   11.34   1 0.00000 0.00000 0.00000 0.00000 0.00000 0.00000
  -3   2  13   57.83    7.94  -2 0.00000 0.00000 0.00000 0.00000 0.00000 0.00000
  -8  -2  -2   57.83    7.94   1 0.00000 0.00000 0.00000 0.00000 0.00000 0.00000
  -5   3  11    5.67   11.34  -2 0.00000 0.00000 0.00000 0.00000 0.00000 0.00000
  -8  -3   2    5.67   11.34   1 0.00000 0.00000 0.00000 0.00000 0.00000 0.00000
   5  -3 -11  -20.41   15.87  -2 0.00000 0.00000 0.00000 0.00000 0.00000 0.00000
   8   3  -2  -20.41   15.87   1 0.00000 0.00000 0.00000 0.00000 0.00000 0.00000
   4  -3  -8  345.84   18.14  -2 0.00000 0.00000 0.00000 0.00000 0.00000 0.00000
   6   3  -2  345.84   18.14   1 0.00000 0.00000 0.00000 0.00000 0.00000 0.00000
  -4   3   8  422.95   14.74  -2 0.00000 0.00000 0.00000 0.00000 0.00000 0.00000
  -6  -3   2  422.95   14.74   1 0.00000 0.00000 0.00000 0.00000 0.00000 0.00000
  -3   3   5  960.43   23.81  -2 0.00000 0.00000 0.00000 0.00000 0.00000 0.00000
  -4  -3   2  960.43   23.81   1 0.00000 0.00000 0.00000 0.00000 0.00000 0.00000
   3  -3  -5  949.09   27.21  -2 0.00000 0.00000 0.00000 0.00000 0.00000 0.00000
   4   3  -2  949.09   27.21   1 0.00000 0.00000 0.00000 0.00000 0.00000 0.00000
   2  -3  -2  706.43   24.95  -2 0.00000 0.00000 0.00000 0.00000 0.00000 0.00000
   2   3  -2  706.43   24.95   1 0.00000 0.00000 0.00000 0.00000 0.00000 0.00000
  -2   3   2  617.98   11.34  -2 0.00000 0.00000 0.00000 0.00000 0.00000 0.00000
  -2  -3   2  617.98   11.34   1 0.00000 0.00000 0.00000 0.00000 0.00000 0.00000
  -1  -3  -1  687.15   41.95  -2 0.00000 0.00000 0.00000 0.00000 0.00000 0.00000
   0   3   2  687.15   41.95   1 0.00000 0.00000 0.00000 0.00000 0.00000 0.00000
   1   3   1  645.20   14.74  -2 0.00000 0.00000 0.00000 0.00000 0.00000 0.00000
   0  -3  -2  645.20   14.74   1 0.00000 0.00000 0.00000 0.00000 0.00000 0.00000
   0   3   4 4170.54   63.50  -2 0.00000 0.00000 0.00000 0.00000 0.00000 0.00000
  -2  -3  -2 4170.54   63.50   1 0.00000 0.00000 0.00000 0.00000 0.00000 0.00000
   0  -3  -4 4605.96   99.78  -2 0.00000 0.00000 0.00000 0.00000 0.00000 0.00000
   2   3   2 4605.96   99.78   1 0.00000 0.00000 0.00000 0.00000 0.00000 0.00000
  -1   3   7 1118.04   20.41  -2 0.00000 0.00000 0.00000 0.00000 0.00000 0.00000
  -4  -3  -2 1118.04   20.41   1 0.00000 0.00000 0.00000 0.00000 0.00000 0.00000
   1  -3  -7 1191.74   30.62  -2 0.00000 0.00000 0.00000 0.00000 0.00000 0.00000
   4   3   2 1191.74   30.62   1 0.00000 0.00000 0.00000 0.00000 0.00000 0.00000
  -2   3  10   10.21    5.67  -2 0.00000 0.00000 0.00000 0.00000 0.00000 0.00000
  -6  -3  -2   10.21    5.67   1 0.00000 0.00000 0.00000 0.00000 0.00000 0.00000
   2  -3 -10   11.34    7.94  -2 0.00000 0.00000 0.00000 0.00000 0.00000 0.00000
   6   3   2   11.34    7.94   1 0.00000 0.00000 0.00000 0.00000 0.00000 0.00000
  -3   3  13  352.65   13.61  -2 0.00000 0.00000 0.00000 0.00000 0.00000 0.00000
  -8  -3  -2  352.65   13.61   1 0.00000 0.00000 0.00000 0.00000 0.00000 0.00000
   3  -3 -13  319.76   31.75  -2 0.00000 0.00000 0.00000 0.00000 0.00000 0.00000
   8   3   2  319.76   31.75   1 0.00000 0.00000 0.00000 0.00000 0.00000 0.00000
  -5   4  11   58.96   12.47  -2 0.00000 0.00000 0.00000 0.00000 0.00000 0.00000
  -8  -4   2   58.96   12.47   1 0.00000 0.00000 0.00000 0.00000 0.00000 0.00000
  -4   4   8  382.13   14.74  -2 0.00000 0.00000 0.00000 0.00000 0.00000 0.00000
  -6  -4   2  382.13   14.74   1 0.00000 0.00000 0.00000 0.00000 0.00000 0.00000
   4  -4  -8  327.70   17.01  -2 0.00000 0.00000 0.00000 0.00000 0.00000 0.00000
   6   4  -2  327.70   17.01   1 0.00000 0.00000 0.00000 0.00000 0.00000 0.00000
   3  -4  -5    9.07   14.74  -2 0.00000 0.00000 0.00000 0.00000 0.00000 0.00000
   4   4  -2    9.07   14.74   1 0.00000 0.00000 0.00000 0.00000 0.00000 0.00000
  -3   4   5    9.07    4.54  -2 0.00000 0.00000 0.00000 0.00000 0.00000 0.00000
  -4  -4   2    9.07    4.54   1 0.00000 0.00000 0.00000 0.00000 0.00000 0.00000
  -2   4   2 1999.09   29.48  -2 0.00000 0.00000 0.00000 0.00000 0.00000 0.00000
  -2  -4   2 1999.09   29.48   1 0.00000 0.00000 0.00000 0.00000 0.00000 0.00000
   2  -4  -2 2333.60   70.30  -2 0.00000 0.00000 0.00000 0.00000 0.00000 0.00000
   2   4  -2 2333.60   70.30   1 0.00000 0.00000 0.00000 0.00000 0.00000 0.00000
   1   4   1 3030.95   46.49  -2 0.00000 0.00000 0.00000 0.00000 0.00000 0.00000
   0  -4  -2 3030.95   46.49   1 0.00000 0.00000 0.00000 0.00000 0.00000 0.00000
   0   4   4  373.06   10.21  -2 0.00000 0.00000 0.00000 0.00000 0.00000 0.00000
  -2  -4  -2  373.06   10.21   1 0.00000 0.00000 0.00000 0.00000 0.00000 0.00000
   0  -4  -4  370.79   29.48  -2 0.00000 0.00000 0.00000 0.00000 0.00000 0.00000
   2   4   2  370.79   29.48   1 0.00000 0.00000 0.00000 0.00000 0.00000 0.00000
   1  -4  -7  898.06   28.35  -2 0.00000 0.00000 0.00000 0.00000 0.00000 0.00000
   4   4   2  898.06   28.35   1 0.00000 0.00000 0.00000 0.00000 0.00000 0.00000
  -1   4   7  856.11   17.01  -2 0.00000 0.00000 0.00000 0.00000 0.00000 0.00000
  -4  -4  -2  856.11   17.01   1 0.00000 0.00000 0.00000 0.00000 0.00000 0.00000
   2  -4 -10 1894.77   62.37  -2 0.00000 0.00000 0.00000 0.00000 0.00000 0.00000
   6   4   2 1894.77   62.37   1 0.00000 0.00000 0.00000 0.00000 0.00000 0.00000
  -2   4  10 1833.54   34.02  -2 0.00000 0.00000 0.00000 0.00000 0.00000 0.00000
  -6  -4  -2 1833.54   34.02   1 0.00000 0.00000 0.00000 0.00000 0.00000 0.00000
  -3   4  13  189.36   19.28  -2 0.00000 0.00000 0.00000 0.00000 0.00000 0.00000
  -8  -4  -2  189.36   19.28   1 0.00000 0.00000 0.00000 0.00000 0.00000 0.00000
   3  -4 -13   70.30   26.08  -2 0.00000 0.00000 0.00000 0.00000 0.00000 0.00000
   8   4   2   70.30   26.08   1 0.00000 0.00000 0.00000 0.00000 0.00000 0.00000
   4  -5  -8  151.94   23.81  -2 0.00000 0.00000 0.00000 0.00000 0.00000 0.00000
   6   5  -2  151.94   23.81   1 0.00000 0.00000 0.00000 0.00000 0.00000 0.00000
  -4   5   8  132.67    9.07  -2 0.00000 0.00000 0.00000 0.00000 0.00000 0.00000
  -6  -5   2  132.67    9.07   1 0.00000 0.00000 0.00000 0.00000 0.00000 0.00000
  -3   5   5  881.05   18.14  -2 0.00000 0.00000 0.00000 0.00000 0.00000 0.00000
  -4  -5   2  881.05   18.14   1 0.00000 0.00000 0.00000 0.00000 0.00000 0.00000
   3  -5  -5  957.02   43.09  -2 0.00000 0.00000 0.00000 0.00000 0.00000 0.00000
   4   5  -2  957.02   43.09   1 0.00000 0.00000 0.00000 0.00000 0.00000 0.00000
  -2   5   2  844.77   14.74  -2 0.00000 0.00000 0.00000 0.00000 0.00000 0.00000
  -2  -5   2  844.77   14.74   1 0.00000 0.00000 0.00000 0.00000 0.00000 0.00000
   1   5   1  221.11    6.80  -2 0.00000 0.00000 0.00000 0.00000 0.00000 0.00000
   0  -5  -2  221.11    6.80   1 0.00000 0.00000 0.00000 0.00000 0.00000 0.00000
   0  -5  -4 2971.99  146.27  -2 0.00000 0.00000 0.00000 0.00000 0.00000 0.00000
   2   5   2 2971.99  146.27   1 0.00000 0.00000 0.00000 0.00000 0.00000 0.00000
   0   5   4 2957.25   47.62  -2 0.00000 0.00000 0.00000 0.00000 0.00000 0.00000
  -2  -5  -2 2957.25   47.62   1 0.00000 0.00000 0.00000 0.00000 0.00000 0.00000
  -1   5   7 1282.46   27.21  -2 0.00000 0.00000 0.00000 0.00000 0.00000 0.00000
  -4  -5  -2 1282.46   27.21   1 0.00000 0.00000 0.00000 0.00000 0.00000 0.00000
   1  -5  -7 1084.02   63.50  -2 0.00000 0.00000 0.00000 0.00000 0.00000 0.00000
   4   5   2 1084.02   63.50   1 0.00000 0.00000 0.00000 0.00000 0.00000 0.00000
  -2   5  10   -3.40   11.34  -2 0.00000 0.00000 0.00000 0.00000 0.00000 0.00000
  -6  -5  -2   -3.40   11.34   1 0.00000 0.00000 0.00000 0.00000 0.00000 0.00000
   2  -5 -10   -4.54   18.14  -2 0.00000 0.00000 0.00000 0.00000 0.00000 0.00000
   6   5   2   -4.54   18.14   1 0.00000 0.00000 0.00000 0.00000 0.00000 0.00000
  -4   6   8  124.73   15.87  -2 0.00000 0.00000 0.00000 0.00000 0.00000 0.00000
  -6  -6   2  124.73   15.87   1 0.00000 0.00000 0.00000 0.00000 0.00000 0.00000
   3  -6  -5   18.14   17.01  -2 0.00000 0.00000 0.00000 0.00000 0.00000 0.00000
   4   6  -2   18.14   17.01   1 0.00000 0.00000 0.00000 0.00000 0.00000 0.00000
  -3   6   5    0.00    7.94  -2 0.00000 0.00000 0.00000 0.00000 0.00000 0.00000
  -4  -6   2    0.00    7.94   1 0.00000 0.00000 0.00000 0.00000 0.00000 0.00000
  -2   6   2  942.28   17.01  -2 0.00000 0.00000 0.00000 0.00000 0.00000 0.00000
  -2  -6   2  942.28   17.01   1 0.00000 0.00000 0.00000 0.00000 0.00000 0.00000
   1   6   1 1328.95   21.54  -2 0.00000 0.00000 0.00000 0.00000 0.00000 0.00000
   0  -6  -2 1328.95   21.54   1 0.00000 0.00000 0.00000 0.00000 0.00000 0.00000
   0   6   4  115.66    6.80  -2 0.00000 0.00000 0.00000 0.00000 0.00000 0.00000
  -2  -6  -2  115.66    6.80   1 0.00000 0.00000 0.00000 0.00000 0.00000 0.00000
  -1   6   7  425.22   11.34  -2 0.00000 0.00000 0.00000 0.00000 0.00000 0.00000
  -4  -6  -2  425.22   11.34   1 0.00000 0.00000 0.00000 0.00000 0.00000 0.00000
  -2   6  10  723.44   30.62  -2 0.00000 0.00000 0.00000 0.00000 0.00000 0.00000
  -6  -6  -2  723.44   30.62   1 0.00000 0.00000 0.00000 0.00000 0.00000 0.00000
  -3   7   5  167.82   13.61  -2 0.00000 0.00000 0.00000 0.00000 0.00000 0.00000
  -4  -7   2  167.82   13.61   1 0.00000 0.00000 0.00000 0.00000 0.00000 0.00000
  -2   7   2   -2.27    7.94  -2 0.00000 0.00000 0.00000 0.00000 0.00000 0.00000
  -2  -7   2   -2.27    7.94   1 0.00000 0.00000 0.00000 0.00000 0.00000 0.00000
   1   7   1  277.81    9.07  -2 0.00000 0.00000 0.00000 0.00000 0.00000 0.00000
   0  -7  -2  277.81    9.07   1 0.00000 0.00000 0.00000 0.00000 0.00000 0.00000
   0   7   4  540.88   14.74  -2 0.00000 0.00000 0.00000 0.00000 0.00000 0.00000
  -2  -7  -2  540.88   14.74   1 0.00000 0.00000 0.00000 0.00000 0.00000 0.00000
  -1   7   7   97.52   11.34  -2 0.00000 0.00000 0.00000 0.00000 0.00000 0.00000
  -4  -7  -2   97.52   11.34   1 0.00000 0.00000 0.00000 0.00000 0.00000 0.00000
   6   0 -12   11.34   10.21  -2 0.00000 0.00000 0.00000 0.00000 0.00000 0.00000
   9   0  -3   11.34   10.21   1 0.00000 0.00000 0.00000 0.00000 0.00000 0.00000
   5   0  -9  640.66   20.41  -2 0.00000 0.00000 0.00000 0.00000 0.00000 0.00000
   7   0  -3  640.66   20.41   1 0.00000 0.00000 0.00000 0.00000 0.00000 0.00000
   4   0  -6 3569.56   58.96  -2 0.00000 0.00000 0.00000 0.00000 0.00000 0.00000
   5   0  -3 3569.56   58.96   1 0.00000 0.00000 0.00000 0.00000 0.00000 0.00000
   3   0  -3  785.80   20.41  -2 0.00000 0.00000 0.00000 0.00000 0.00000 0.00000
   3   0  -3  785.80   20.41   1 0.00000 0.00000 0.00000 0.00000 0.00000 0.00000
   2   0   0 4396.19   79.37  -2 0.00000 0.00000 0.00000 0.00000 0.00000 0.00000
   1   0  -3 4396.19   79.37   1 0.00000 0.00000 0.00000 0.00000 0.00000 0.00000
  -1   0  -3 9239.13  147.41  -2 0.00000 0.00000 0.00000 0.00000 0.00000 0.00000
   1   0   3 9239.13  147.41   1 0.00000 0.00000 0.00000 0.00000 0.00000 0.00000
   0   0  -6 3317.83   48.76  -2 0.00000 0.00000 0.00000 0.00000 0.00000 0.00000
   3   0   3 3317.83   48.76   1 0.00000 0.00000 0.00000 0.00000 0.00000 0.00000
   1   0  -9  393.47   10.21  -2 0.00000 0.00000 0.00000 0.00000 0.00000 0.00000
   5   0   3  393.47   10.21   1 0.00000 0.00000 0.00000 0.00000 0.00000 0.00000
   2   0 -12 1810.86   34.02  -2 0.00000 0.00000 0.00000 0.00000 0.00000 0.00000
   7   0   3 1810.86   34.02   1 0.00000 0.00000 0.00000 0.00000 0.00000 0.00000
   3   0 -15  289.15   14.74  -2 0.00000 0.00000 0.00000 0.00000 0.00000 0.00000
   9   0   3  289.15   14.74   1 0.00000 0.00000 0.00000 0.00000 0.00000 0.00000
  -6   1  12  428.62   18.14  -2 0.00000 0.00000 0.00000 0.00000 0.00000 0.00000
  -9  -1   3  428.62   18.14   1 0.00000 0.00000 0.00000 0.00000 0.00000 0.00000
   6  -1 -12  454.70   19.28  -2 0.00000 0.00000 0.00000 0.00000 0.00000 0.00000
   9   1  -3  454.70   19.28   1 0.00000 0.00000 0.00000 0.00000 0.00000 0.00000
  -5   1   9  157.61   11.34  -2 0.00000 0.00000 0.00000 0.00000 0.00000 0.00000
  -7  -1   3  157.61   11.34   1 0.00000 0.00000 0.00000 0.00000 0.00000 0.00000
   5  -1  -9  162.15    9.07  -2 0.00000 0.00000 0.00000 0.00000 0.00000 0.00000
   7   1  -3  162.15    9.07   1 0.00000 0.00000 0.00000 0.00000 0.00000 0.00000
   4  -1  -6  432.02   13.61  -2 0.00000 0.00000 0.00000 0.00000 0.00000 0.00000
   5   1  -3  432.02   13.61   1 0.00000 0.00000 0.00000 0.00000 0.00000 0.00000
  -4   1   6  434.29   13.61  -2 0.00000 0.00000 0.00000 0.00000 0.00000 0.00000
  -5  -1   3  434.29   13.61   1 0.00000 0.00000 0.00000 0.00000 0.00000 0.00000
   3  -1  -3 2959.52   58.96  -2 0.00000 0.00000 0.00000 0.00000 0.00000 0.00000
   3   1  -3 2959.52   58.96   1 0.00000 0.00000 0.00000 0.00000 0.00000 0.00000
  -3   1   3 3106.93   60.10  -2 0.00000 0.00000 0.00000 0.00000 0.00000 0.00000
  -3  -1   3 3106.93   60.10   1 0.00000 0.00000 0.00000 0.00000 0.00000 0.00000
   2   1  -3  536.34   17.01   1 0.00000 0.00000 0.00000 0.00000 0.00000 0.00000
  -2  -1   3  506.86   14.74   1 0.00000 0.00000 0.00000 0.00000 0.00000 0.00000
   2  -1   0 4145.59   64.63  -2 0.00000 0.00000 0.00000 0.00000 0.00000 0.00000
   1   1  -3 4145.59   64.63   1 0.00000 0.00000 0.00000 0.00000 0.00000 0.00000
  -2   1   0 4105.90   61.23  -2 0.00000 0.00000 0.00000 0.00000 0.00000 0.00000
  -1  -1   3 4105.90   61.23   1 0.00000 0.00000 0.00000 0.00000 0.00000 0.00000
   0   1   3  213.18    7.94   1 0.00000 0.00000 0.00000 0.00000 0.00000 0.00000
   0  -1  -3  204.10    6.80   1 0.00000 0.00000 0.00000 0.00000 0.00000 0.00000
   1   1   3   -2.27    5.67  -2 0.00000 0.00000 0.00000 0.00000 0.00000 0.00000
  -1  -1  -3   -2.27    5.67   1 0.00000 0.00000 0.00000 0.00000 0.00000 0.00000
  -1  -1  -3    0.00    5.67  -2 0.00000 0.00000 0.00000 0.00000 0.00000 0.00000
   1   1   3    0.00    5.67   1 0.00000 0.00000 0.00000 0.00000 0.00000 0.00000
  -2  -1  -3  173.49    4.54   1 0.00000 0.00000 0.00000 0.00000 0.00000 0.00000
   2   1   3  172.35    6.80   1 0.00000 0.00000 0.00000 0.00000 0.00000 0.00000
   0   1   6 3044.56   45.36  -2 0.00000 0.00000 0.00000 0.00000 0.00000 0.00000
  -3  -1  -3 3044.56   45.36   1 0.00000 0.00000 0.00000 0.00000 0.00000 0.00000
   0  -1  -6 3055.90   51.03  -2 0.00000 0.00000 0.00000 0.00000 0.00000 0.00000
   3   1   3 3055.90   51.03   1 0.00000 0.00000 0.00000 0.00000 0.00000 0.00000
  -1   1   9 1966.21   35.15  -2 0.00000 0.00000 0.00000 0.00000 0.00000 0.00000
  -5  -1  -3 1966.21   35.15   1 0.00000 0.00000 0.00000 0.00000 0.00000 0.00000
   1  -1  -9 1982.08   34.02  -2 0.00000 0.00000 0.00000 0.00000 0.00000 0.00000
   5   1   3 1982.08   34.02   1 0.00000 0.00000 0.00000 0.00000 0.00000 0.00000
   2  -1 -12  256.26   11.34  -2 0.00000 0.00000 0.00000 0.00000 0.00000 0.00000
   7   1   3  256.26   11.34   1 0.00000 0.00000 0.00000 0.00000 0.00000 0.00000
  -2   1  12  261.93   10.21  -2 0.00000 0.00000 0.00000 0.00000 0.00000 0.00000
  -7  -1  -3  261.93   10.21   1 0.00000 0.00000 0.00000 0.00000 0.00000 0.00000
  -3   1  15   64.63    9.07  -2 0.00000 0.00000 0.00000 0.00000 0.00000 0.00000
  -9  -1  -3   64.63    9.07   1 0.00000 0.00000 0.00000 0.00000 0.00000 0.00000
   3  -1 -15   81.64   11.34  -2 0.00000 0.00000 0.00000 0.00000 0.00000 0.00000
   9   1   3   81.64   11.34   1 0.00000 0.00000 0.00000 0.00000 0.00000 0.00000
  -6   2  12   38.55   11.34  -2 0.00000 0.00000 0.00000 0.00000 0.00000 0.00000
  -9  -2   3   38.55   11.34   1 0.00000 0.00000 0.00000 0.00000 0.00000 0.00000
   6  -2 -12   43.09   20.41  -2 0.00000 0.00000 0.00000 0.00000 0.00000 0.00000
   9   2  -3   43.09   20.41   1 0.00000 0.00000 0.00000 0.00000 0.00000 0.00000
  -5   2   9  388.93   14.74  -2 0.00000 0.00000 0.00000 0.00000 0.00000 0.00000
  -7  -2   3  388.93   14.74   1 0.00000 0.00000 0.00000 0.00000 0.00000 0.00000
   5  -2  -9  400.27   18.14  -2 0.00000 0.00000 0.00000 0.00000 0.00000 0.00000
   7   2  -3  400.27   18.14   1 0.00000 0.00000 0.00000 0.00000 0.00000 0.00000
  -4   2   6  961.56   21.54  -2 0.00000 0.00000 0.00000 0.00000 0.00000 0.00000
  -5  -2   3  961.56   21.54   1 0.00000 0.00000 0.00000 0.00000 0.00000 0.00000
   4  -2  -6 1035.26   29.48  -2 0.00000 0.00000 0.00000 0.00000 0.00000 0.00000
   5   2  -3 1035.26   29.48   1 0.00000 0.00000 0.00000 0.00000 0.00000 0.00000
   3  -2  -3   35.15   13.61  -2 0.00000 0.00000 0.00000 0.00000 0.00000 0.00000
   3   2  -3   35.15   13.61   1 0.00000 0.00000 0.00000 0.00000 0.00000 0.00000
  -3   2   3   30.62    5.67  -2 0.00000 0.00000 0.00000 0.00000 0.00000 0.00000
  -3  -2   3   30.62    5.67   1 0.00000 0.00000 0.00000 0.00000 0.00000 0.00000
  -2   2   0 1543.26   32.88  -2 0.00000 0.00000 0.00000 0.00000 0.00000 0.00000
  -1  -2   3 1543.26   32.88   1 0.00000 0.00000 0.00000 0.00000 0.00000 0.00000
   2  -2   0 1576.14   35.15  -2 0.00000 0.00000 0.00000 0.00000 0.00000 0.00000
   1   2  -3 1576.14   35.15   1 0.00000 0.00000 0.00000 0.00000 0.00000 0.00000
   0  -2  -3  735.91   20.41   1 0.00000 0.00000 0.00000 0.00000 0.00000 0.00000
   0   2   3  748.38   20.41   1 0.00000 0.00000 0.00000 0.00000 0.00000 0.00000
  -1  -2  -3 2635.22   54.43  -2 0.00000 0.00000 0.00000 0.00000 0.00000 0.00000
   1   2   3 2635.22   54.43   1 0.00000 0.00000 0.00000 0.00000 0.00000 0.00000
   1   2   3 2433.38   44.22  -2 0.00000 0.00000 0.00000 0.00000 0.00000 0.00000
  -1  -2  -3 2433.38   44.22   1 0.00000 0.00000 0.00000 0.00000 0.00000 0.00000
   0  -2  -6 1542.12   30.62  -2 0.00000 0.00000 0.00000 0.00000 0.00000 0.00000
   3   2   3 1542.12   30.62   1 0.00000 0.00000 0.00000 0.00000 0.00000 0.00000
   0   2   6 1470.69   22.68  -2 0.00000 0.00000 0.00000 0.00000 0.00000 0.00000
  -3  -2  -3 1470.69   22.68   1 0.00000 0.00000 0.00000 0.00000 0.00000 0.00000
   1  -2  -9   14.74    6.80  -2 0.00000 0.00000 0.00000 0.00000 0.00000 0.00000
   5   2   3   14.74    6.80   1 0.00000 0.00000 0.00000 0.00000 0.00000 0.00000
  -1   2   9   15.87    5.67  -2 0.00000 0.00000 0.00000 0.00000 0.00000 0.00000
  -5  -2  -3   15.87    5.67   1 0.00000 0.00000 0.00000 0.00000 0.00000 0.00000
  -2   2  12  537.48   15.87  -2 0.00000 0.00000 0.00000 0.00000 0.00000 0.00000
  -7  -2  -3  537.48   15.87   1 0.00000 0.00000 0.00000 0.00000 0.00000 0.00000
   2  -2 -12  509.13   17.01  -2 0.00000 0.00000 0.00000 0.00000 0.00000 0.00000
   7   2   3  509.13   17.01   1 0.00000 0.00000 0.00000 0.00000 0.00000 0.00000
   3  -2 -15  164.42   15.87  -2 0.00000 0.00000 0.00000 0.00000 0.00000 0.00000
   9   2   3  164.42   15.87   1 0.00000 0.00000 0.00000 0.00000 0.00000 0.00000
  -3   2  15  163.28   11.34  -2 0.00000 0.00000 0.00000 0.00000 0.00000 0.00000
  -9  -2  -3  163.28   11.34   1 0.00000 0.00000 0.00000 0.00000 0.00000 0.00000
  -6   3  12   58.96   11.34  -2 0.00000 0.00000 0.00000 0.00000 0.00000 0.00000
  -9  -3   3   58.96   11.34   1 0.00000 0.00000 0.00000 0.00000 0.00000 0.00000
  -5   3   9   99.78   10.21  -2 0.00000 0.00000 0.00000 0.00000 0.00000 0.00000
  -7  -3   3   99.78   10.21   1 0.00000 0.00000 0.00000 0.00000 0.00000 0.00000
   5  -3  -9   77.11   11.34  -2 0.00000 0.00000 0.00000 0.00000 0.00000 0.00000
   7   3  -3   77.11   11.34   1 0.00000 0.00000 0.00000 0.00000 0.00000 0.00000
  -4   3   6  527.27   14.74  -2 0.00000 0.00000 0.00000 0.00000 0.00000 0.00000
  -5  -3   3  527.27   14.74   1 0.00000 0.00000 0.00000 0.00000 0.00000 0.00000
   4  -3  -6  543.14   30.62  -2 0.00000 0.00000 0.00000 0.00000 0.00000 0.00000
   5   3  -3  543.14   30.62   1 0.00000 0.00000 0.00000 0.00000 0.00000 0.00000
   3  -3  -3  376.46   22.68  -2 0.00000 0.00000 0.00000 0.00000 0.00000 0.00000
   3   3  -3  376.46   22.68   1 0.00000 0.00000 0.00000 0.00000 0.00000 0.00000
  -3   3   3  359.45   12.47  -2 0.00000 0.00000 0.00000 0.00000 0.00000 0.00000
  -3  -3   3  359.45   12.47   1 0.00000 0.00000 0.00000 0.00000 0.00000 0.00000
   2  -3   0  218.85    9.07  -2 0.00000 0.00000 0.00000 0.00000 0.00000 0.00000
   1   3  -3  218.85    9.07   1 0.00000 0.00000 0.00000 0.00000 0.00000 0.00000
  -2   3   0  199.57    6.80  -2 0.00000 0.00000 0.00000 0.00000 0.00000 0.00000
  -1  -3   3  199.57    6.80   1 0.00000 0.00000 0.00000 0.00000 0.00000 0.00000
   1   3   3    4.54    4.54  -2 0.00000 0.00000 0.00000 0.00000 0.00000 0.00000
  -1  -3  -3    4.54    4.54   1 0.00000 0.00000 0.00000 0.00000 0.00000 0.00000
  -1  -3  -3   11.34    6.80  -2 0.00000 0.00000 0.00000 0.00000 0.00000 0.00000
   1   3   3   11.34    6.80   1 0.00000 0.00000 0.00000 0.00000 0.00000 0.00000
   0   3   6  107.72    5.67  -2 0.00000 0.00000 0.00000 0.00000 0.00000 0.00000
  -3  -3  -3  107.72    5.67   1 0.00000 0.00000 0.00000 0.00000 0.00000 0.00000
   0  -3  -6   98.65    7.94  -2 0.00000 0.00000 0.00000 0.00000 0.00000 0.00000
   3   3   3   98.65    7.94   1 0.00000 0.00000 0.00000 0.00000 0.00000 0.00000
   1  -3  -9  235.85   11.34  -2 0.00000 0.00000 0.00000 0.00000 0.00000 0.00000
   5   3   3  235.85   11.34   1 0.00000 0.00000 0.00000 0.00000 0.00000 0.00000
  -1   3   9  227.92    7.94  -2 0.00000 0.00000 0.00000 0.00000 0.00000 0.00000
  -5  -3  -3  227.92    7.94   1 0.00000 0.00000 0.00000 0.00000 0.00000 0.00000
   2  -3 -12  356.05   18.14  -2 0.00000 0.00000 0.00000 0.00000 0.00000 0.00000
   7   3   3  356.05   18.14   1 0.00000 0.00000 0.00000 0.00000 0.00000 0.00000
  -2   3  12  348.11   12.47  -2 0.00000 0.00000 0.00000 0.00000 0.00000 0.00000
  -7  -3  -3  348.11   12.47   1 0.00000 0.00000 0.00000 0.00000 0.00000 0.00000
  -3   3  15   65.77   36.29  -2 0.00000 0.00000 0.00000 0.00000 0.00000 0.00000
  -9  -3  -3   65.77   36.29   1 0.00000 0.00000 0.00000 0.00000 0.00000 0.00000
   3  -3 -15    6.80   31.75  -2 0.00000 0.00000 0.00000 0.00000 0.00000 0.00000
   9   3   3    6.80   31.75   1 0.00000 0.00000 0.00000 0.00000 0.00000 0.00000
   5  -4  -9  153.08   26.08  -2 0.00000 0.00000 0.00000 0.00000 0.00000 0.00000
   7   4  -3  153.08   26.08   1 0.00000 0.00000 0.00000 0.00000 0.00000 0.00000
  -5   4   9  154.21   10.21  -2 0.00000 0.00000 0.00000 0.00000 0.00000 0.00000
  -7  -4   3  154.21   10.21   1 0.00000 0.00000 0.00000 0.00000 0.00000 0.00000
   4  -4  -6   -6.80   15.87  -2 0.00000 0.00000 0.00000 0.00000 0.00000 0.00000
   5   4  -3   -6.80   15.87   1 0.00000 0.00000 0.00000 0.00000 0.00000 0.00000
  -4   4   6    5.67    6.80  -2 0.00000 0.00000 0.00000 0.00000 0.00000 0.00000
  -5  -4   3    5.67    6.80   1 0.00000 0.00000 0.00000 0.00000 0.00000 0.00000
   3  -4  -3  325.43   24.95  -2 0.00000 0.00000 0.00000 0.00000 0.00000 0.00000
   3   4  -3  325.43   24.95   1 0.00000 0.00000 0.00000 0.00000 0.00000 0.00000
  -3   4   3  319.76    7.94  -2 0.00000 0.00000 0.00000 0.00000 0.00000 0.00000
  -3  -4   3  319.76    7.94   1 0.00000 0.00000 0.00000 0.00000 0.00000 0.00000
  -2   4   0  131.53    5.67  -2 0.00000 0.00000 0.00000 0.00000 0.00000 0.00000
  -1  -4   3  131.53    5.67   1 0.00000 0.00000 0.00000 0.00000 0.00000 0.00000
   2  -4   0  129.27   18.14  -2 0.00000 0.00000 0.00000 0.00000 0.00000 0.00000
   1   4  -3  129.27   18.14   1 0.00000 0.00000 0.00000 0.00000 0.00000 0.00000
   1   4   3    9.07    5.67  -2 0.00000 0.00000 0.00000 0.00000 0.00000 0.00000
  -1  -4  -3    9.07    5.67   1 0.00000 0.00000 0.00000 0.00000 0.00000 0.00000
  -1  -4  -3    6.80   12.47  -2 0.00000 0.00000 0.00000 0.00000 0.00000 0.00000
   1   4   3    6.80   12.47   1 0.00000 0.00000 0.00000 0.00000 0.00000 0.00000
   0   4   6  214.31    7.94  -2 0.00000 0.00000 0.00000 0.00000 0.00000 0.00000
  -3  -4  -3  214.31    7.94   1 0.00000 0.00000 0.00000 0.00000 0.00000 0.00000
   0  -4  -6  233.59   13.61  -2 0.00000 0.00000 0.00000 0.00000 0.00000 0.00000
   3   4   3  233.59   13.61   1 0.00000 0.00000 0.00000 0.00000 0.00000 0.00000
   1  -4  -9  190.50   12.47  -2 0.00000 0.00000 0.00000 0.00000 0.00000 0.00000
   5   4   3  190.50   12.47   1 0.00000 0.00000 0.00000 0.00000 0.00000 0.00000
  -1   4   9  199.57    7.94  -2 0.00000 0.00000 0.00000 0.00000 0.00000 0.00000
  -5  -4  -3  199.57    7.94   1 0.00000 0.00000 0.00000 0.00000 0.00000 0.00000
  -2   4  12   -1.13    7.94  -2 0.00000 0.00000 0.00000 0.00000 0.00000 0.00000
  -7  -4  -3   -1.13    7.94   1 0.00000 0.00000 0.00000 0.00000 0.00000 0.00000
   2  -4 -12   -3.40   13.61  -2 0.00000 0.00000 0.00000 0.00000 0.00000 0.00000
   7   4   3   -3.40   13.61   1 0.00000 0.00000 0.00000 0.00000 0.00000 0.00000
  -5   5   9  201.84   13.61  -2 0.00000 0.00000 0.00000 0.00000 0.00000 0.00000
  -7  -5   3  201.84   13.61   1 0.00000 0.00000 0.00000 0.00000 0.00000 0.00000
   5  -5  -9  132.67   38.55  -2 0.00000 0.00000 0.00000 0.00000 0.00000 0.00000
   7   5  -3  132.67   38.55   1 0.00000 0.00000 0.00000 0.00000 0.00000 0.00000
  -4   5   6  337.91   12.47  -2 0.00000 0.00000 0.00000 0.00000 0.00000 0.00000
  -5  -5   3  337.91   12.47   1 0.00000 0.00000 0.00000 0.00000 0.00000 0.00000
   4  -5  -6  393.47   29.48  -2 0.00000 0.00000 0.00000 0.00000 0.00000 0.00000
   5   5  -3  393.47   29.48   1 0.00000 0.00000 0.00000 0.00000 0.00000 0.00000
  -3   5   3   22.68    4.54  -2 0.00000 0.00000 0.00000 0.00000 0.00000 0.00000
  -3  -5   3   22.68    4.54   1 0.00000 0.00000 0.00000 0.00000 0.00000 0.00000
   3  -5  -3   38.55   13.61  -2 0.00000 0.00000 0.00000 0.00000 0.00000 0.00000
   3   5  -3   38.55   13.61   1 0.00000 0.00000 0.00000 0.00000 0.00000 0.00000
  -2   5   0    5.67    4.54  -2 0.00000 0.00000 0.00000 0.00000 0.00000 0.00000
  -1  -5   3    5.67    4.54   1 0.00000 0.00000 0.00000 0.00000 0.00000 0.00000
   1   5   3    0.00    6.80  -2 0.00000 0.00000 0.00000 0.00000 0.00000 0.00000
  -1  -5  -3    0.00    6.80   1 0.00000 0.00000 0.00000 0.00000 0.00000 0.00000
   0  -5  -6   13.61   19.28  -2 0.00000 0.00000 0.00000 0.00000 0.00000 0.00000
   3   5   3   13.61   19.28   1 0.00000 0.00000 0.00000 0.00000 0.00000 0.00000
   0   5   6    7.94    5.67  -2 0.00000 0.00000 0.00000 0.00000 0.00000 0.00000
  -3  -5  -3    7.94    5.67   1 0.00000 0.00000 0.00000 0.00000 0.00000 0.00000
  -1   5   9   20.41    5.67  -2 0.00000 0.00000 0.00000 0.00000 0.00000 0.00000
  -5  -5  -3   20.41    5.67   1 0.00000 0.00000 0.00000 0.00000 0.00000 0.00000
   1  -5  -9    3.40   10.21  -2 0.00000 0.00000 0.00000 0.00000 0.00000 0.00000
   5   5   3    3.40   10.21   1 0.00000 0.00000 0.00000 0.00000 0.00000 0.00000
   2  -5 -12  122.46   32.88  -2 0.00000 0.00000 0.00000 0.00000 0.00000 0.00000
   7   5   3  122.46   32.88   1 0.00000 0.00000 0.00000 0.00000 0.00000 0.00000
  -2   5  12  215.44   23.81  -2 0.00000 0.00000 0.00000 0.00000 0.00000 0.00000
  -7  -5  -3  215.44   23.81   1 0.00000 0.00000 0.00000 0.00000 0.00000 0.00000
  -4   6   6    2.27   10.21  -2 0.00000 0.00000 0.00000 0.00000 0.00000 0.00000
  -5  -6   3    2.27   10.21   1 0.00000 0.00000 0.00000 0.00000 0.00000 0.00000
   4  -6  -6   -9.07   34.02  -2 0.00000 0.00000 0.00000 0.00000 0.00000 0.00000
   5   6  -3   -9.07   34.02   1 0.00000 0.00000 0.00000 0.00000 0.00000 0.00000
  -3   6   3  108.86    5.67  -2 0.00000 0.00000 0.00000 0.00000 0.00000 0.00000
  -3  -6   3  108.86    5.67   1 0.00000 0.00000 0.00000 0.00000 0.00000 0.00000
  -2   6   0  107.72    5.67  -2 0.00000 0.00000 0.00000 0.00000 0.00000 0.00000
  -1  -6   3  107.72    5.67   1 0.00000 0.00000 0.00000 0.00000 0.00000 0.00000
   1   6   3   26.08    5.67  -2 0.00000 0.00000 0.00000 0.00000 0.00000 0.00000
  -1  -6  -3   26.08    5.67   1 0.00000 0.00000 0.00000 0.00000 0.00000 0.00000
   0   6   6  128.13    7.94  -2 0.00000 0.00000 0.00000 0.00000 0.00000 0.00000
  -3  -6  -3  128.13    7.94   1 0.00000 0.00000 0.00000 0.00000 0.00000 0.00000
   0  -6  -6  107.72   24.95  -2 0.00000 0.00000 0.00000 0.00000 0.00000 0.00000
   3   6   3  107.72   24.95   1 0.00000 0.00000 0.00000 0.00000 0.00000 0.00000
   1  -6  -9   32.88   23.81  -2 0.00000 0.00000 0.00000 0.00000 0.00000 0.00000
   5   6   3   32.88   23.81   1 0.00000 0.00000 0.00000 0.00000 0.00000 0.00000
  -1   6   9   75.97    7.94  -2 0.00000 0.00000 0.00000 0.00000 0.00000 0.00000
  -5  -6  -3   75.97    7.94   1 0.00000 0.00000 0.00000 0.00000 0.00000 0.00000
  -3   7   3  248.33   17.01  -2 0.00000 0.00000 0.00000 0.00000 0.00000 0.00000
  -3  -7   3  248.33   17.01   1 0.00000 0.00000 0.00000 0.00000 0.00000 0.00000
  -2   7   0  269.87    9.07  -2 0.00000 0.00000 0.00000 0.00000 0.00000 0.00000
  -1  -7   3  269.87    9.07   1 0.00000 0.00000 0.00000 0.00000 0.00000 0.00000
   1   7   3    1.13    6.80  -2 0.00000 0.00000 0.00000 0.00000 0.00000 0.00000
  -1  -7  -3    1.13    6.80   1 0.00000 0.00000 0.00000 0.00000 0.00000 0.00000
   0   7   6  176.89   10.21  -2 0.00000 0.00000 0.00000 0.00000 0.00000 0.00000
  -3  -7  -3  176.89   10.21   1 0.00000 0.00000 0.00000 0.00000 0.00000 0.00000
   6   0 -10   38.55   11.34  -2 0.00000 0.00000 0.00000 0.00000 0.00000 0.00000
   8   0  -4   38.55   11.34   1 0.00000 0.00000 0.00000 0.00000 0.00000 0.00000
   5   0  -7    4.54    6.80  -2 0.00000 0.00000 0.00000 0.00000 0.00000 0.00000
   6   0  -4    4.54    6.80   1 0.00000 0.00000 0.00000 0.00000 0.00000 0.00000
   4   0  -4   46.49    5.67  -2 0.00000 0.00000 0.00000 0.00000 0.00000 0.00000
   4   0  -4   46.49    5.67   1 0.00000 0.00000 0.00000 0.00000 0.00000 0.00000
   3   0  -1  331.10    9.07  -2 0.00000 0.00000 0.00000 0.00000 0.00000 0.00000
   2   0  -4  331.10    9.07   1 0.00000 0.00000 0.00000 0.00000 0.00000 0.00000
  -2   0  -2 2741.81   49.89  -2 0.00000 0.00000 0.00000 0.00000 0.00000 0.00000
   0   0   4 2741.81   49.89   1 0.00000 0.00000 0.00000 0.00000 0.00000 0.00000
  -1   0  -5  155.35    5.67  -2 0.00000 0.00000 0.00000 0.00000 0.00000 0.00000
   2   0   4  155.35    5.67   1 0.00000 0.00000 0.00000 0.00000 0.00000 0.00000
   0   0  -8 2024.04   31.75  -2 0.00000 0.00000 0.00000 0.00000 0.00000 0.00000
   4   0   4 2024.04   31.75   1 0.00000 0.00000 0.00000 0.00000 0.00000 0.00000
   1   0 -11 1830.14   31.75  -2 0.00000 0.00000 0.00000 0.00000 0.00000 0.00000
   6   0   4 1830.14   31.75   1 0.00000 0.00000 0.00000 0.00000 0.00000 0.00000
   2   0 -14  144.01   10.21  -2 0.00000 0.00000 0.00000 0.00000 0.00000 0.00000
   8   0   4  144.01   10.21   1 0.00000 0.00000 0.00000 0.00000 0.00000 0.00000
  -6   1  10   57.83    9.07  -2 0.00000 0.00000 0.00000 0.00000 0.00000 0.00000
  -8  -1   4   57.83    9.07   1 0.00000 0.00000 0.00000 0.00000 0.00000 0.00000
   6  -1 -10   68.03    7.94  -2 0.00000 0.00000 0.00000 0.00000 0.00000 0.00000
   8   1  -4   68.03    7.94   1 0.00000 0.00000 0.00000 0.00000 0.00000 0.00000
   5  -1  -7   47.62    6.80  -2 0.00000 0.00000 0.00000 0.00000 0.00000 0.00000
   6   1  -4   47.62    6.80   1 0.00000 0.00000 0.00000 0.00000 0.00000 0.00000
  -5   1   7   57.83    6.80  -2 0.00000 0.00000 0.00000 0.00000 0.00000 0.00000
  -6  -1   4   57.83    6.80   1 0.00000 0.00000 0.00000 0.00000 0.00000 0.00000
  -4   1   4  208.64    7.94  -2 0.00000 0.00000 0.00000 0.00000 0.00000 0.00000
  -4  -1   4  208.64    7.94   1 0.00000 0.00000 0.00000 0.00000 0.00000 0.00000
   4  -1  -4  221.11    6.80  -2 0.00000 0.00000 0.00000 0.00000 0.00000 0.00000
   4   1  -4  221.11    6.80   1 0.00000 0.00000 0.00000 0.00000 0.00000 0.00000
   3  -1  -1   43.09    5.67  -2 0.00000 0.00000 0.00000 0.00000 0.00000 0.00000
   2   1  -4   43.09    5.67   1 0.00000 0.00000 0.00000 0.00000 0.00000 0.00000
  -3   1   1   37.42    5.67  -2 0.00000 0.00000 0.00000 0.00000 0.00000 0.00000
  -2  -1   4   37.42    5.67   1 0.00000 0.00000 0.00000 0.00000 0.00000 0.00000
  -1  -1   4  501.19   15.87   1 0.00000 0.00000 0.00000 0.00000 0.00000 0.00000
   1   1  -4  502.32   17.01   1 0.00000 0.00000 0.00000 0.00000 0.00000 0.00000
   2   1   2 3377.93   53.29  -2 0.00000 0.00000 0.00000 0.00000 0.00000 0.00000
   0  -1  -4 3377.93   53.29   1 0.00000 0.00000 0.00000 0.00000 0.00000 0.00000
  -2  -1  -2 3267.94   78.24  -2 0.00000 0.00000 0.00000 0.00000 0.00000 0.00000
   0   1   4 3267.94   78.24   1 0.00000 0.00000 0.00000 0.00000 0.00000 0.00000
  -1  -1  -4    4.54    4.54   1 0.00000 0.00000 0.00000 0.00000 0.00000 0.00000
   1   1   4   14.74    5.67   1 0.00000 0.00000 0.00000 0.00000 0.00000 0.00000
   1   1   5 1602.22   35.15  -2 0.00000 0.00000 0.00000 0.00000 0.00000 0.00000
  -2  -1  -4 1602.22   35.15   1 0.00000 0.00000 0.00000 0.00000 0.00000 0.00000
  -1  -1  -5 1756.43   39.69  -2 0.00000 0.00000 0.00000 0.00000 0.00000 0.00000
   2   1   4 1756.43   39.69   1 0.00000 0.00000 0.00000 0.00000 0.00000 0.00000
   0   1   8  359.45    9.07  -2 0.00000 0.00000 0.00000 0.00000 0.00000 0.00000
  -4  -1  -4  359.45    9.07   1 0.00000 0.00000 0.00000 0.00000 0.00000 0.00000
   0  -1  -8  374.19   10.21  -2 0.00000 0.00000 0.00000 0.00000 0.00000 0.00000
   4   1   4  374.19   10.21   1 0.00000 0.00000 0.00000 0.00000 0.00000 0.00000
   1  -1 -11  106.59    7.94  -2 0.00000 0.00000 0.00000 0.00000 0.00000 0.00000
   6   1   4  106.59    7.94   1 0.00000 0.00000 0.00000 0.00000 0.00000 0.00000
  -1   1  11  117.93    6.80  -2 0.00000 0.00000 0.00000 0.00000 0.00000 0.00000
  -6  -1  -4  117.93    6.80   1 0.00000 0.00000 0.00000 0.00000 0.00000 0.00000
   2  -1 -14  686.02   19.28  -2 0.00000 0.00000 0.00000 0.00000 0.00000 0.00000
   8   1   4  686.02   19.28   1 0.00000 0.00000 0.00000 0.00000 0.00000 0.00000
  -2   1  14  715.50   19.28  -2 0.00000 0.00000 0.00000 0.00000 0.00000 0.00000
  -8  -1  -4  715.50   19.28   1 0.00000 0.00000 0.00000 0.00000 0.00000 0.00000
   6  -2 -10    5.67   12.47  -2 0.00000 0.00000 0.00000 0.00000 0.00000 0.00000
   8   2  -4    5.67   12.47   1 0.00000 0.00000 0.00000 0.00000 0.00000 0.00000
  -6   2  10    3.40    9.07  -2 0.00000 0.00000 0.00000 0.00000 0.00000 0.00000
  -8  -2   4    3.40    9.07   1 0.00000 0.00000 0.00000 0.00000 0.00000 0.00000
  -5   2   7  154.21    9.07  -2 0.00000 0.00000 0.00000 0.00000 0.00000 0.00000
  -6  -2   4  154.21    9.07   1 0.00000 0.00000 0.00000 0.00000 0.00000 0.00000
   5  -2  -7  149.68   11.34  -2 0.00000 0.00000 0.00000 0.00000 0.00000 0.00000
   6   2  -4  149.68   11.34   1 0.00000 0.00000 0.00000 0.00000 0.00000 0.00000
   4  -2  -4  991.04   27.21  -2 0.00000 0.00000 0.00000 0.00000 0.00000 0.00000
   4   2  -4  991.04   27.21   1 0.00000 0.00000 0.00000 0.00000 0.00000 0.00000
  -4   2   4  919.60   20.41  -2 0.00000 0.00000 0.00000 0.00000 0.00000 0.00000
  -4  -2   4  919.60   20.41   1 0.00000 0.00000 0.00000 0.00000 0.00000 0.00000
  -3   2   1  681.48   17.01  -2 0.00000 0.00000 0.00000 0.00000 0.00000 0.00000
  -2  -2   4  681.48   17.01   1 0.00000 0.00000 0.00000 0.00000 0.00000 0.00000
   3  -2  -1  637.26   19.28  -2 0.00000 0.00000 0.00000 0.00000 0.00000 0.00000
   2   2  -4  637.26   19.28   1 0.00000 0.00000 0.00000 0.00000 0.00000 0.00000
   2   2   2  281.21   10.21  -2 0.00000 0.00000 0.00000 0.00000 0.00000 0.00000
   0  -2  -4  281.21   10.21   1 0.00000 0.00000 0.00000 0.00000 0.00000 0.00000
  -2  -2  -2  312.96   10.21  -2 0.00000 0.00000 0.00000 0.00000 0.00000 0.00000
   0   2   4  312.96   10.21   1 0.00000 0.00000 0.00000 0.00000 0.00000 0.00000
   1   2   5  447.90   10.21  -2 0.00000 0.00000 0.00000 0.00000 0.00000 0.00000
  -2  -2  -4  447.90   10.21   1 0.00000 0.00000 0.00000 0.00000 0.00000 0.00000
  -1  -2  -5  492.12   14.74  -2 0.00000 0.00000 0.00000 0.00000 0.00000 0.00000
   2   2   4  492.12   14.74   1 0.00000 0.00000 0.00000 0.00000 0.00000 0.00000
   0   2   8 1790.45   28.35  -2 0.00000 0.00000 0.00000 0.00000 0.00000 0.00000
  -4  -2  -4 1790.45   28.35   1 0.00000 0.00000 0.00000 0.00000 0.00000 0.00000
   0  -2  -8 1899.31   38.55  -2 0.00000 0.00000 0.00000 0.00000 0.00000 0.00000
   4   2   4 1899.31   38.55   1 0.00000 0.00000 0.00000 0.00000 0.00000 0.00000
  -1   2  11  497.79   12.47  -2 0.00000 0.00000 0.00000 0.00000 0.00000 0.00000
  -6  -2  -4  497.79   12.47   1 0.00000 0.00000 0.00000 0.00000 0.00000 0.00000
   1  -2 -11  472.84   17.01  -2 0.00000 0.00000 0.00000 0.00000 0.00000 0.00000
   6   2   4  472.84   17.01   1 0.00000 0.00000 0.00000 0.00000 0.00000 0.00000
  -2   2  14   -1.13   10.21  -2 0.00000 0.00000 0.00000 0.00000 0.00000 0.00000
  -8  -2  -4   -1.13   10.21   1 0.00000 0.00000 0.00000 0.00000 0.00000 0.00000
   2  -2 -14   -3.40    9.07  -2 0.00000 0.00000 0.00000 0.00000 0.00000 0.00000
   8   2   4   -3.40    9.07   1 0.00000 0.00000 0.00000 0.00000 0.00000 0.00000
  -6   3  10  477.38   15.87  -2 0.00000 0.00000 0.00000 0.00000 0.00000 0.00000
  -8  -3   4  477.38   15.87   1 0.00000 0.00000 0.00000 0.00000 0.00000 0.00000
   6  -3 -10  497.79   43.09  -2 0.00000 0.00000 0.00000 0.00000 0.00000 0.00000
   8   3  -4  497.79   43.09   1 0.00000 0.00000 0.00000 0.00000 0.00000 0.00000
   5  -3  -7  645.20   38.55  -2 0.00000 0.00000 0.00000 0.00000 0.00000 0.00000
   6   3  -4  645.20   38.55   1 0.00000 0.00000 0.00000 0.00000 0.00000 0.00000
  -5   3   7  670.14   17.01  -2 0.00000 0.00000 0.00000 0.00000 0.00000 0.00000
  -6  -3   4  670.14   17.01   1 0.00000 0.00000 0.00000 0.00000 0.00000 0.00000
  -4   3   4   38.55    6.80  -2 0.00000 0.00000 0.00000 0.00000 0.00000 0.00000
  -4  -3   4   38.55    6.80   1 0.00000 0.00000 0.00000 0.00000 0.00000 0.00000
   4  -3  -4   39.69   13.61  -2 0.00000 0.00000 0.00000 0.00000 0.00000 0.00000
   4   3  -4   39.69   13.61   1 0.00000 0.00000 0.00000 0.00000 0.00000 0.00000
  -3   3   1 1783.65   28.35  -2 0.00000 0.00000 0.00000 0.00000 0.00000 0.00000
  -2  -3   4 1783.65   28.35   1 0.00000 0.00000 0.00000 0.00000 0.00000 0.00000
   3  -3  -1 1864.16   46.49  -2 0.00000 0.00000 0.00000 0.00000 0.00000 0.00000
   2   3  -4 1864.16   46.49   1 0.00000 0.00000 0.00000 0.00000 0.00000 0.00000
  -2  -3  -2 4554.93   77.11  -2 0.00000 0.00000 0.00000 0.00000 0.00000 0.00000
   0   3   4 4554.93   77.11   1 0.00000 0.00000 0.00000 0.00000 0.00000 0.00000
   2   3   2 4314.54   82.78  -2 0.00000 0.00000 0.00000 0.00000 0.00000 0.00000
   0  -3  -4 4314.54   82.78   1 0.00000 0.00000 0.00000 0.00000 0.00000 0.00000
   1   3   5  334.50    9.07  -2 0.00000 0.00000 0.00000 0.00000 0.00000 0.00000
  -2  -3  -4  334.50    9.07   1 0.00000 0.00000 0.00000 0.00000 0.00000 0.00000
  -1  -3  -5  358.32   15.87  -2 0.00000 0.00000 0.00000 0.00000 0.00000 0.00000
   2   3   4  358.32   15.87   1 0.00000 0.00000 0.00000 0.00000 0.00000 0.00000
   0   3   8  240.39    7.94  -2 0.00000 0.00000 0.00000 0.00000 0.00000 0.00000
  -4  -3  -4  240.39    7.94   1 0.00000 0.00000 0.00000 0.00000 0.00000 0.00000
   0  -3  -8  275.54   12.47  -2 0.00000 0.00000 0.00000 0.00000 0.00000 0.00000
   4   3   4  275.54   12.47   1 0.00000 0.00000 0.00000 0.00000 0.00000 0.00000
   1  -3 -11  478.51   17.01  -2 0.00000 0.00000 0.00000 0.00000 0.00000 0.00000
   6   3   4  478.51   17.01   1 0.00000 0.00000 0.00000 0.00000 0.00000 0.00000
  -1   3  11  494.39   13.61  -2 0.00000 0.00000 0.00000 0.00000 0.00000 0.00000
  -6  -3  -4  494.39   13.61   1 0.00000 0.00000 0.00000 0.00000 0.00000 0.00000
   2  -3 -14  173.49   14.74  -2 0.00000 0.00000 0.00000 0.00000 0.00000 0.00000
   8   3   4  173.49   14.74   1 0.00000 0.00000 0.00000 0.00000 0.00000 0.00000
  -2   3  14  181.43   13.61  -2 0.00000 0.00000 0.00000 0.00000 0.00000 0.00000
  -8  -3  -4  181.43   13.61   1 0.00000 0.00000 0.00000 0.00000 0.00000 0.00000
  -6   4  10   87.31   12.47  -2 0.00000 0.00000 0.00000 0.00000 0.00000 0.00000
  -8  -4   4   87.31   12.47   1 0.00000 0.00000 0.00000 0.00000 0.00000 0.00000
  -5   4   7  487.58   14.74  -2 0.00000 0.00000 0.00000 0.00000 0.00000 0.00000
  -6  -4   4  487.58   14.74   1 0.00000 0.00000 0.00000 0.00000 0.00000 0.00000
   5  -4  -7  441.09   30.62  -2 0.00000 0.00000 0.00000 0.00000 0.00000 0.00000
   6   4  -4  441.09   30.62   1 0.00000 0.00000 0.00000 0.00000 0.00000 0.00000
   4  -4  -4 2964.05   89.58  -2 0.00000 0.00000 0.00000 0.00000 0.00000 0.00000
   4   4  -4 2964.05   89.58   1 0.00000 0.00000 0.00000 0.00000 0.00000 0.00000
  -4   4   4 2872.21   51.03  -2 0.00000 0.00000 0.00000 0.00000 0.00000 0.00000
  -4  -4   4 2872.21   51.03   1 0.00000 0.00000 0.00000 0.00000 0.00000 0.00000
  -3   4   1 1000.11   18.14  -2 0.00000 0.00000 0.00000 0.00000 0.00000 0.00000
  -2  -4   4 1000.11   18.14   1 0.00000 0.00000 0.00000 0.00000 0.00000 0.00000
   3  -4  -1 1124.84   39.69  -2 0.00000 0.00000 0.00000 0.00000 0.00000 0.00000
   2   4  -4 1124.84   39.69   1 0.00000 0.00000 0.00000 0.00000 0.00000 0.00000
   2   4   2  337.91   11.34  -2 0.00000 0.00000 0.00000 0.00000 0.00000 0.00000
   0  -4  -4  337.91   11.34   1 0.00000 0.00000 0.00000 0.00000 0.00000 0.00000
  -2  -4  -2  348.11   21.54  -2 0.00000 0.00000 0.00000 0.00000 0.00000 0.00000
   0   4   4  348.11   21.54   1 0.00000 0.00000 0.00000 0.00000 0.00000 0.00000
  -1  -4  -5 2831.38   66.90  -2 0.00000 0.00000 0.00000 0.00000 0.00000 0.00000
   2   4   4 2831.38   66.90   1 0.00000 0.00000 0.00000 0.00000 0.00000 0.00000
   1   4   5 2573.99   41.95  -2 0.00000 0.00000 0.00000 0.00000 0.00000 0.00000
  -2  -4  -4 2573.99   41.95   1 0.00000 0.00000 0.00000 0.00000 0.00000 0.00000
   0   4   8 1265.45   22.68  -2 0.00000 0.00000 0.00000 0.00000 0.00000 0.00000
  -4  -4  -4 1265.45   22.68   1 0.00000 0.00000 0.00000 0.00000 0.00000 0.00000
   0  -4  -8 1229.16   39.69  -2 0.00000 0.00000 0.00000 0.00000 0.00000 0.00000
   4   4   4 1229.16   39.69   1 0.00000 0.00000 0.00000 0.00000 0.00000 0.00000
   1  -4 -11    6.80   13.61  -2 0.00000 0.00000 0.00000 0.00000 0.00000 0.00000
   6   4   4    6.80   13.61   1 0.00000 0.00000 0.00000 0.00000 0.00000 0.00000
  -1   4  11    9.07    6.80  -2 0.00000 0.00000 0.00000 0.00000 0.00000 0.00000
  -6  -4  -4    9.07    6.80   1 0.00000 0.00000 0.00000 0.00000 0.00000 0.00000
  -2   4  14  107.72   21.54  -2 0.00000 0.00000 0.00000 0.00000 0.00000 0.00000
  -8  -4  -4  107.72   21.54   1 0.00000 0.00000 0.00000 0.00000 0.00000 0.00000
   2  -4 -14   64.63   29.48  -2 0.00000 0.00000 0.00000 0.00000 0.00000 0.00000
   8   4   4   64.63   29.48   1 0.00000 0.00000 0.00000 0.00000 0.00000 0.00000
  -5   5   7  638.39   20.41  -2 0.00000 0.00000 0.00000 0.00000 0.00000 0.00000
  -6  -5   4  638.39   20.41   1 0.00000 0.00000 0.00000 0.00000 0.00000 0.00000
   5  -5  -7  673.55   38.55  -2 0.00000 0.00000 0.00000 0.00000 0.00000 0.00000
   6   5  -4  673.55   38.55   1 0.00000 0.00000 0.00000 0.00000 0.00000 0.00000
   4  -5  -4  -14.74   17.01  -2 0.00000 0.00000 0.00000 0.00000 0.00000 0.00000
   4   5  -4  -14.74   17.01   1 0.00000 0.00000 0.00000 0.00000 0.00000 0.00000
  -4   5   4   -2.27    9.07  -2 0.00000 0.00000 0.00000 0.00000 0.00000 0.00000
  -4  -5   4   -2.27    9.07   1 0.00000 0.00000 0.00000 0.00000 0.00000 0.00000
  -3   5   1 1910.65   31.75  -2 0.00000 0.00000 0.00000 0.00000 0.00000 0.00000
  -2  -5   4 1910.65   31.75   1 0.00000 0.00000 0.00000 0.00000 0.00000 0.00000
   3  -5  -1 2152.17  105.45  -2 0.00000 0.00000 0.00000 0.00000 0.00000 0.00000
   2   5  -4 2152.17  105.45   1 0.00000 0.00000 0.00000 0.00000 0.00000 0.00000
   2   5   2 2991.27   51.03  -2 0.00000 0.00000 0.00000 0.00000 0.00000 0.00000
   0  -5  -4 2991.27   51.03   1 0.00000 0.00000 0.00000 0.00000 0.00000 0.00000
   1   5   5   85.04    6.80  -2 0.00000 0.00000 0.00000 0.00000 0.00000 0.00000
  -2  -5  -4   85.04    6.80   1 0.00000 0.00000 0.00000 0.00000 0.00000 0.00000
  -1  -5  -5   82.78   21.54  -2 0.00000 0.00000 0.00000 0.00000 0.00000 0.00000
   2   5   4   82.78   21.54   1 0.00000 0.00000 0.00000 0.00000 0.00000 0.00000
   0   5   8  502.32   12.47  -2 0.00000 0.00000 0.00000 0.00000 0.00000 0.00000
  -4  -5  -4  502.32   12.47   1 0.00000 0.00000 0.00000 0.00000 0.00000 0.00000
   0  -5  -8  466.04   21.54  -2 0.00000 0.00000 0.00000 0.00000 0.00000 0.00000
   4   5   4  466.04   21.54   1 0.00000 0.00000 0.00000 0.00000 0.00000 0.00000
  -1   5  11  424.08   18.14  -2 0.00000 0.00000 0.00000 0.00000 0.00000 0.00000
  -6  -5  -4  424.08   18.14   1 0.00000 0.00000 0.00000 0.00000 0.00000 0.00000
   1  -5 -11  337.91   24.95  -2 0.00000 0.00000 0.00000 0.00000 0.00000 0.00000
   6   5   4  337.91   24.95   1 0.00000 0.00000 0.00000 0.00000 0.00000 0.00000
  -5   6   7  164.42   15.87  -2 0.00000 0.00000 0.00000 0.00000 0.00000 0.00000
  -6  -6   4  164.42   15.87   1 0.00000 0.00000 0.00000 0.00000 0.00000 0.00000
   5  -6  -7  148.54   43.09  -2 0.00000 0.00000 0.00000 0.00000 0.00000 0.00000
   6   6  -4  148.54   43.09   1 0.00000 0.00000 0.00000 0.00000 0.00000 0.00000
  -4   6   4 1212.15   28.35  -2 0.00000 0.00000 0.00000 0.00000 0.00000 0.00000
  -4  -6   4 1212.15   28.35   1 0.00000 0.00000 0.00000 0.00000 0.00000 0.00000
   4  -6  -4 1266.58   86.18  -2 0.00000 0.00000 0.00000 0.00000 0.00000 0.00000
   4   6  -4 1266.58   86.18   1 0.00000 0.00000 0.00000 0.00000 0.00000 0.00000
  -3   6   1  489.85   12.47  -2 0.00000 0.00000 0.00000 0.00000 0.00000 0.00000
  -2  -6   4  489.85   12.47   1 0.00000 0.00000 0.00000 0.00000 0.00000 0.00000
   2   6   2  116.79    6.80  -2 0.00000 0.00000 0.00000 0.00000 0.00000 0.00000
   0  -6  -4  116.79    6.80   1 0.00000 0.00000 0.00000 0.00000 0.00000 0.00000
   1   6   5 1046.60   23.81  -2 0.00000 0.00000 0.00000 0.00000 0.00000 0.00000
  -2  -6  -4 1046.60   23.81   1 0.00000 0.00000 0.00000 0.00000 0.00000 0.00000
   0   6   8  574.89   15.87  -2 0.00000 0.00000 0.00000 0.00000 0.00000 0.00000
  -4  -6  -4  574.89   15.87   1 0.00000 0.00000 0.00000 0.00000 0.00000 0.00000
   0  -6  -8  411.61   46.49  -2 0.00000 0.00000 0.00000 0.00000 0.00000 0.00000
   4   6   4  411.61   46.49   1 0.00000 0.00000 0.00000 0.00000 0.00000 0.00000
  -4   7   4   -3.40   17.01  -2 0.00000 0.00000 0.00000 0.00000 0.00000 0.00000
  -4  -7   4   -3.40   17.01   1 0.00000 0.00000 0.00000 0.00000 0.00000 0.00000
  -3   7   1  148.54    7.94  -2 0.00000 0.00000 0.00000 0.00000 0.00000 0.00000
  -2  -7   4  148.54    7.94   1 0.00000 0.00000 0.00000 0.00000 0.00000 0.00000
   2   7   2  571.49   14.74  -2 0.00000 0.00000 0.00000 0.00000 0.00000 0.00000
   0  -7  -4  571.49   14.74   1 0.00000 0.00000 0.00000 0.00000 0.00000 0.00000
   1   7   5  171.22   10.21  -2 0.00000 0.00000 0.00000 0.00000 0.00000 0.00000
  -2  -7  -4  171.22   10.21   1 0.00000 0.00000 0.00000 0.00000 0.00000 0.00000
   7   0 -11  882.19   34.02  -2 0.00000 0.00000 0.00000 0.00000 0.00000 0.00000
   9   0  -5  882.19   34.02   1 0.00000 0.00000 0.00000 0.00000 0.00000 0.00000
   6   0  -8  493.25   17.01  -2 0.00000 0.00000 0.00000 0.00000 0.00000 0.00000
   7   0  -5  493.25   17.01   1 0.00000 0.00000 0.00000 0.00000 0.00000 0.00000
   5   0  -5  783.53   18.14  -2 0.00000 0.00000 0.00000 0.00000 0.00000 0.00000
   5   0  -5  783.53   18.14   1 0.00000 0.00000 0.00000 0.00000 0.00000 0.00000
   4   0  -2 4654.72   82.78  -2 0.00000 0.00000 0.00000 0.00000 0.00000 0.00000
   3   0  -5 4654.72   82.78   1 0.00000 0.00000 0.00000 0.00000 0.00000 0.00000
   3   0   1  992.18   23.81  -2 0.00000 0.00000 0.00000 0.00000 0.00000 0.00000
   1   0  -5  992.18   23.81   1 0.00000 0.00000 0.00000 0.00000 0.00000 0.00000
  -2   0  -4  145.14    5.67  -2 0.00000 0.00000 0.00000 0.00000 0.00000 0.00000
   1   0   5  145.14    5.67   1 0.00000 0.00000 0.00000 0.00000 0.00000 0.00000
  -1   0  -7  857.24   17.01  -2 0.00000 0.00000 0.00000 0.00000 0.00000 0.00000
   3   0   5  857.24   17.01   1 0.00000 0.00000 0.00000 0.00000 0.00000 0.00000
   0   0 -10  154.21    7.94  -2 0.00000 0.00000 0.00000 0.00000 0.00000 0.00000
   5   0   5  154.21    7.94   1 0.00000 0.00000 0.00000 0.00000 0.00000 0.00000
   1   0 -13    6.80    6.80  -2 0.00000 0.00000 0.00000 0.00000 0.00000 0.00000
   7   0   5    6.80    6.80   1 0.00000 0.00000 0.00000 0.00000 0.00000 0.00000
   2   0 -16   13.61    9.07  -2 0.00000 0.00000 0.00000 0.00000 0.00000 0.00000
   9   0   5   13.61    9.07   1 0.00000 0.00000 0.00000 0.00000 0.00000 0.00000
  -7   1  11   39.69   11.34  -2 0.00000 0.00000 0.00000 0.00000 0.00000 0.00000
  -9  -1   5   39.69   11.34   1 0.00000 0.00000 0.00000 0.00000 0.00000 0.00000
   7  -1 -11   38.55   10.21  -2 0.00000 0.00000 0.00000 0.00000 0.00000 0.00000
   9   1  -5   38.55   10.21   1 0.00000 0.00000 0.00000 0.00000 0.00000 0.00000
  -6   1   8  840.23   22.68  -2 0.00000 0.00000 0.00000 0.00000 0.00000 0.00000
  -7  -1   5  840.23   22.68   1 0.00000 0.00000 0.00000 0.00000 0.00000 0.00000
   6  -1  -8  920.74   24.95  -2 0.00000 0.00000 0.00000 0.00000 0.00000 0.00000
   7   1  -5  920.74   24.95   1 0.00000 0.00000 0.00000 0.00000 0.00000 0.00000
   5  -1  -5 1217.82   23.81  -2 0.00000 0.00000 0.00000 0.00000 0.00000 0.00000
   5   1  -5 1217.82   23.81   1 0.00000 0.00000 0.00000 0.00000 0.00000 0.00000
  -5   1   5 1211.02   24.95  -2 0.00000 0.00000 0.00000 0.00000 0.00000 0.00000
  -5  -1   5 1211.02   24.95   1 0.00000 0.00000 0.00000 0.00000 0.00000 0.00000
  -4   1   2  216.58    7.94  -2 0.00000 0.00000 0.00000 0.00000 0.00000 0.00000
  -3  -1   5  216.58    7.94   1 0.00000 0.00000 0.00000 0.00000 0.00000 0.00000
   4  -1  -2  258.53    9.07  -2 0.00000 0.00000 0.00000 0.00000 0.00000 0.00000
   3   1  -5  258.53    9.07   1 0.00000 0.00000 0.00000 0.00000 0.00000 0.00000
   3  -1   1 1099.90   22.68  -2 0.00000 0.00000 0.00000 0.00000 0.00000 0.00000
   1   1  -5 1099.90   22.68   1 0.00000 0.00000 0.00000 0.00000 0.00000 0.00000
  -3   1  -1 1101.03   22.68  -2 0.00000 0.00000 0.00000 0.00000 0.00000 0.00000
  -1  -1   5 1101.03   22.68   1 0.00000 0.00000 0.00000 0.00000 0.00000 0.00000
   0  -1  -5  399.14   12.47   1 0.00000 0.00000 0.00000 0.00000 0.00000 0.00000
   0   1   5  391.20   17.01   1 0.00000 0.00000 0.00000 0.00000 0.00000 0.00000
   2   1   4 1664.59   29.48  -2 0.00000 0.00000 0.00000 0.00000 0.00000 0.00000
  -1  -1  -5 1664.59   29.48   1 0.00000 0.00000 0.00000 0.00000 0.00000 0.00000
  -2  -1  -4 1703.14   43.09  -2 0.00000 0.00000 0.00000 0.00000 0.00000 0.00000
   1   1   5 1703.14   43.09   1 0.00000 0.00000 0.00000 0.00000 0.00000 0.00000
  -1  -1  -7  192.77    9.07  -2 0.00000 0.00000 0.00000 0.00000 0.00000 0.00000
   3   1   5  192.77    9.07   1 0.00000 0.00000 0.00000 0.00000 0.00000 0.00000
   1   1   7  193.90    7.94  -2 0.00000 0.00000 0.00000 0.00000 0.00000 0.00000
  -3  -1  -5  193.90    7.94   1 0.00000 0.00000 0.00000 0.00000 0.00000 0.00000
   0   1  10   40.82    5.67  -2 0.00000 0.00000 0.00000 0.00000 0.00000 0.00000
  -5  -1  -5   40.82    5.67   1 0.00000 0.00000 0.00000 0.00000 0.00000 0.00000
   0  -1 -10   53.29    6.80  -2 0.00000 0.00000 0.00000 0.00000 0.00000 0.00000
   5   1   5   53.29    6.80   1 0.00000 0.00000 0.00000 0.00000 0.00000 0.00000
  -1   1  13    2.27    6.80  -2 0.00000 0.00000 0.00000 0.00000 0.00000 0.00000
  -7  -1  -5    2.27    6.80   1 0.00000 0.00000 0.00000 0.00000 0.00000 0.00000
   1  -1 -13    4.54    7.94  -2 0.00000 0.00000 0.00000 0.00000 0.00000 0.00000
   7   1   5    4.54    7.94   1 0.00000 0.00000 0.00000 0.00000 0.00000 0.00000
  -2   1  16   19.28   11.34  -2 0.00000 0.00000 0.00000 0.00000 0.00000 0.00000
  -9  -1  -5   19.28   11.34   1 0.00000 0.00000 0.00000 0.00000 0.00000 0.00000
   2  -1 -16    7.94   10.21  -2 0.00000 0.00000 0.00000 0.00000 0.00000 0.00000
   9   1   5    7.94   10.21   1 0.00000 0.00000 0.00000 0.00000 0.00000 0.00000
  -7   2  11  293.68   18.14  -2 0.00000 0.00000 0.00000 0.00000 0.00000 0.00000
  -9  -2   5  293.68   18.14   1 0.00000 0.00000 0.00000 0.00000 0.00000 0.00000
   6  -2  -8  300.49   11.34  -2 0.00000 0.00000 0.00000 0.00000 0.00000 0.00000
   7   2  -5  300.49   11.34   1 0.00000 0.00000 0.00000 0.00000 0.00000 0.00000
  -6   2   8  307.29   12.47  -2 0.00000 0.00000 0.00000 0.00000 0.00000 0.00000
  -7  -2   5  307.29   12.47   1 0.00000 0.00000 0.00000 0.00000 0.00000 0.00000
   5  -2  -5   70.30    9.07  -2 0.00000 0.00000 0.00000 0.00000 0.00000 0.00000
   5   2  -5   70.30    9.07   1 0.00000 0.00000 0.00000 0.00000 0.00000 0.00000
  -5   2   5   75.97    7.94  -2 0.00000 0.00000 0.00000 0.00000 0.00000 0.00000
  -5  -2   5   75.97    7.94   1 0.00000 0.00000 0.00000 0.00000 0.00000 0.00000
  -4   2   2 1280.19   31.75  -2 0.00000 0.00000 0.00000 0.00000 0.00000 0.00000
  -3  -2   5 1280.19   31.75   1 0.00000 0.00000 0.00000 0.00000 0.00000 0.00000
   4  -2  -2 1229.16   30.62  -2 0.00000 0.00000 0.00000 0.00000 0.00000 0.00000
   3   2  -5 1229.16   30.62   1 0.00000 0.00000 0.00000 0.00000 0.00000 0.00000
  -3   2  -1 1059.08   18.14  -2 0.00000 0.00000 0.00000 0.00000 0.00000 0.00000
  -1  -2   5 1059.08   18.14   1 0.00000 0.00000 0.00000 0.00000 0.00000 0.00000
   3  -2   1 1118.04   23.81  -2 0.00000 0.00000 0.00000 0.00000 0.00000 0.00000
   1   2  -5 1118.04   23.81   1 0.00000 0.00000 0.00000 0.00000 0.00000 0.00000
  -2  -2  -4  501.19   14.74  -2 0.00000 0.00000 0.00000 0.00000 0.00000 0.00000
   1   2   5  501.19   14.74   1 0.00000 0.00000 0.00000 0.00000 0.00000 0.00000
   2   2   4  483.05   12.47  -2 0.00000 0.00000 0.00000 0.00000 0.00000 0.00000
  -1  -2  -5  483.05   12.47   1 0.00000 0.00000 0.00000 0.00000 0.00000 0.00000
   1   2   7   41.95    5.67  -2 0.00000 0.00000 0.00000 0.00000 0.00000 0.00000
  -3  -2  -5   41.95    5.67   1 0.00000 0.00000 0.00000 0.00000 0.00000 0.00000
  -1  -2  -7   41.95    6.80  -2 0.00000 0.00000 0.00000 0.00000 0.00000 0.00000
   3   2   5   41.95    6.80   1 0.00000 0.00000 0.00000 0.00000 0.00000 0.00000
   0  -2 -10  318.63   12.47  -2 0.00000 0.00000 0.00000 0.00000 0.00000 0.00000
   5   2   5  318.63   12.47   1 0.00000 0.00000 0.00000 0.00000 0.00000 0.00000
   0   2  10  327.70   10.21  -2 0.00000 0.00000 0.00000 0.00000 0.00000 0.00000
  -5  -2  -5  327.70   10.21   1 0.00000 0.00000 0.00000 0.00000 0.00000 0.00000
  -1   2  13  146.27    7.94  -2 0.00000 0.00000 0.00000 0.00000 0.00000 0.00000
  -7  -2  -5  146.27    7.94   1 0.00000 0.00000 0.00000 0.00000 0.00000 0.00000
   1  -2 -13  172.35   12.47  -2 0.00000 0.00000 0.00000 0.00000 0.00000 0.00000
   7   2   5  172.35   12.47   1 0.00000 0.00000 0.00000 0.00000 0.00000 0.00000
  -2   2  16   60.10   13.61  -2 0.00000 0.00000 0.00000 0.00000 0.00000 0.00000
  -9  -2  -5   60.10   13.61   1 0.00000 0.00000 0.00000 0.00000 0.00000 0.00000
   2  -2 -16   83.91   13.61  -2 0.00000 0.00000 0.00000 0.00000 0.00000 0.00000
   9   2   5   83.91   13.61   1 0.00000 0.00000 0.00000 0.00000 0.00000 0.00000
  -7   3  11    5.67   23.81  -2 0.00000 0.00000 0.00000 0.00000 0.00000 0.00000
  -9  -3   5    5.67   23.81   1 0.00000 0.00000 0.00000 0.00000 0.00000 0.00000
  -6   3   8   31.75    9.07  -2 0.00000 0.00000 0.00000 0.00000 0.00000 0.00000
  -7  -3   5   31.75    9.07   1 0.00000 0.00000 0.00000 0.00000 0.00000 0.00000
   6  -3  -8   17.01   19.28  -2 0.00000 0.00000 0.00000 0.00000 0.00000 0.00000
   7   3  -5   17.01   19.28   1 0.00000 0.00000 0.00000 0.00000 0.00000 0.00000
  -5   3   5  250.60   10.21  -2 0.00000 0.00000 0.00000 0.00000 0.00000 0.00000
  -5  -3   5  250.60   10.21   1 0.00000 0.00000 0.00000 0.00000 0.00000 0.00000
   5  -3  -5  219.98   22.68  -2 0.00000 0.00000 0.00000 0.00000 0.00000 0.00000
   5   3  -5  219.98   22.68   1 0.00000 0.00000 0.00000 0.00000 0.00000 0.00000
  -4   3   2  977.43   30.62  -2 0.00000 0.00000 0.00000 0.00000 0.00000 0.00000
  -3  -3   5  977.43   30.62   1 0.00000 0.00000 0.00000 0.00000 0.00000 0.00000
   4  -3  -2  783.53   34.02  -2 0.00000 0.00000 0.00000 0.00000 0.00000 0.00000
   3   3  -5  783.53   34.02   1 0.00000 0.00000 0.00000 0.00000 0.00000 0.00000
  -3   3  -1  213.18    9.07  -2 0.00000 0.00000 0.00000 0.00000 0.00000 0.00000
  -1  -3   5  213.18    9.07   1 0.00000 0.00000 0.00000 0.00000 0.00000 0.00000
   3  -3   1  199.57    9.07  -2 0.00000 0.00000 0.00000 0.00000 0.00000 0.00000
   1   3  -5  199.57    9.07   1 0.00000 0.00000 0.00000 0.00000 0.00000 0.00000
   2   3   4  293.68    9.07  -2 0.00000 0.00000 0.00000 0.00000 0.00000 0.00000
  -1  -3  -5  293.68    9.07   1 0.00000 0.00000 0.00000 0.00000 0.00000 0.00000
  -2  -3  -4  278.94   10.21  -2 0.00000 0.00000 0.00000 0.00000 0.00000 0.00000
   1   3   5  278.94   10.21   1 0.00000 0.00000 0.00000 0.00000 0.00000 0.00000
   1   3   7 1368.63   24.95  -2 0.00000 0.00000 0.00000 0.00000 0.00000 0.00000
  -3  -3  -5 1368.63   24.95   1 0.00000 0.00000 0.00000 0.00000 0.00000 0.00000
  -1  -3  -7 1475.22   36.29  -2 0.00000 0.00000 0.00000 0.00000 0.00000 0.00000
   3   3   5 1475.22   36.29   1 0.00000 0.00000 0.00000 0.00000 0.00000 0.00000
   0   3  10 1061.34   23.81  -2 0.00000 0.00000 0.00000 0.00000 0.00000 0.00000
  -5  -3  -5 1061.34   23.81   1 0.00000 0.00000 0.00000 0.00000 0.00000 0.00000
   0  -3 -10 1096.50   34.02  -2 0.00000 0.00000 0.00000 0.00000 0.00000 0.00000
   5   3   5 1096.50   34.02   1 0.00000 0.00000 0.00000 0.00000 0.00000 0.00000
  -1   3  13   -5.67   10.21  -2 0.00000 0.00000 0.00000 0.00000 0.00000 0.00000
  -7  -3  -5   -5.67   10.21   1 0.00000 0.00000 0.00000 0.00000 0.00000 0.00000
   1  -3 -13   10.21   10.21  -2 0.00000 0.00000 0.00000 0.00000 0.00000 0.00000
   7   3   5   10.21   10.21   1 0.00000 0.00000 0.00000 0.00000 0.00000 0.00000
   6  -4  -8  108.86   27.21  -2 0.00000 0.00000 0.00000 0.00000 0.00000 0.00000
   7   4  -5  108.86   27.21   1 0.00000 0.00000 0.00000 0.00000 0.00000 0.00000
  -6   4   8  113.39   10.21  -2 0.00000 0.00000 0.00000 0.00000 0.00000 0.00000
  -7  -4   5  113.39   10.21   1 0.00000 0.00000 0.00000 0.00000 0.00000 0.00000
  -5   4   5  196.17   10.21  -2 0.00000 0.00000 0.00000 0.00000 0.00000 0.00000
  -5  -4   5  196.17   10.21   1 0.00000 0.00000 0.00000 0.00000 0.00000 0.00000
   5  -4  -5  165.55   22.68  -2 0.00000 0.00000 0.00000 0.00000 0.00000 0.00000
   5   4  -5  165.55   22.68   1 0.00000 0.00000 0.00000 0.00000 0.00000 0.00000
  -4   4   2    1.13    4.54  -2 0.00000 0.00000 0.00000 0.00000 0.00000 0.00000
  -3  -4   5    1.13    4.54   1 0.00000 0.00000 0.00000 0.00000 0.00000 0.00000
   4  -4  -2   -2.27   14.74  -2 0.00000 0.00000 0.00000 0.00000 0.00000 0.00000
   3   4  -5   -2.27   14.74   1 0.00000 0.00000 0.00000 0.00000 0.00000 0.00000
  -3   4  -1  904.86   22.68  -2 0.00000 0.00000 0.00000 0.00000 0.00000 0.00000
  -1  -4   5  904.86   22.68   1 0.00000 0.00000 0.00000 0.00000 0.00000 0.00000
   3  -4   1 1000.11   27.21  -2 0.00000 0.00000 0.00000 0.00000 0.00000 0.00000
   1   4  -5 1000.11   27.21   1 0.00000 0.00000 0.00000 0.00000 0.00000 0.00000
   2   4   4 2697.58   46.49  -2 0.00000 0.00000 0.00000 0.00000 0.00000 0.00000
  -1  -4  -5 2697.58   46.49   1 0.00000 0.00000 0.00000 0.00000 0.00000 0.00000
  -2  -4  -4 2872.21   68.03  -2 0.00000 0.00000 0.00000 0.00000 0.00000 0.00000
   1   4   5 2872.21   68.03   1 0.00000 0.00000 0.00000 0.00000 0.00000 0.00000
   1   4   7  336.77    9.07  -2 0.00000 0.00000 0.00000 0.00000 0.00000 0.00000
  -3  -4  -5  336.77    9.07   1 0.00000 0.00000 0.00000 0.00000 0.00000 0.00000
  -1  -4  -7  340.17   17.01  -2 0.00000 0.00000 0.00000 0.00000 0.00000 0.00000
   3   4   5  340.17   17.01   1 0.00000 0.00000 0.00000 0.00000 0.00000 0.00000
   0  -4 -10  469.44   22.68  -2 0.00000 0.00000 0.00000 0.00000 0.00000 0.00000
   5   4   5  469.44   22.68   1 0.00000 0.00000 0.00000 0.00000 0.00000 0.00000
   0   4  10  487.58   12.47  -2 0.00000 0.00000 0.00000 0.00000 0.00000 0.00000
  -5  -4  -5  487.58   12.47   1 0.00000 0.00000 0.00000 0.00000 0.00000 0.00000
   1  -4 -13  670.14   44.22  -2 0.00000 0.00000 0.00000 0.00000 0.00000 0.00000
   7   4   5  670.14   44.22   1 0.00000 0.00000 0.00000 0.00000 0.00000 0.00000
  -1   4  13  732.51   29.48  -2 0.00000 0.00000 0.00000 0.00000 0.00000 0.00000
  -7  -4  -5  732.51   29.48   1 0.00000 0.00000 0.00000 0.00000 0.00000 0.00000
   6  -5  -8  -24.95   35.15  -2 0.00000 0.00000 0.00000 0.00000 0.00000 0.00000
   7   5  -5  -24.95   35.15   1 0.00000 0.00000 0.00000 0.00000 0.00000 0.00000
  -6   5   8   -7.94   17.01  -2 0.00000 0.00000 0.00000 0.00000 0.00000 0.00000
  -7  -5   5   -7.94   17.01   1 0.00000 0.00000 0.00000 0.00000 0.00000 0.00000
   5  -5  -5   85.04   19.28  -2 0.00000 0.00000 0.00000 0.00000 0.00000 0.00000
   5   5  -5   85.04   19.28   1 0.00000 0.00000 0.00000 0.00000 0.00000 0.00000
  -5   5   5   69.17   10.21  -2 0.00000 0.00000 0.00000 0.00000 0.00000 0.00000
  -5  -5   5   69.17   10.21   1 0.00000 0.00000 0.00000 0.00000 0.00000 0.00000
  -4   5   2  886.72   18.14  -2 0.00000 0.00000 0.00000 0.00000 0.00000 0.00000
  -3  -5   5  886.72   18.14   1 0.00000 0.00000 0.00000 0.00000 0.00000 0.00000
   4  -5  -2 1046.60   40.82  -2 0.00000 0.00000 0.00000 0.00000 0.00000 0.00000
   3   5  -5 1046.60   40.82   1 0.00000 0.00000 0.00000 0.00000 0.00000 0.00000
  -3   5  -1  527.27   14.74  -2 0.00000 0.00000 0.00000 0.00000 0.00000 0.00000
  -1  -5   5  527.27   14.74   1 0.00000 0.00000 0.00000 0.00000 0.00000 0.00000
   2   5   4   79.37    6.80  -2 0.00000 0.00000 0.00000 0.00000 0.00000 0.00000
  -1  -5  -5   79.37    6.80   1 0.00000 0.00000 0.00000 0.00000 0.00000 0.00000
  -2  -5  -4   86.18   14.74  -2 0.00000 0.00000 0.00000 0.00000 0.00000 0.00000
   1   5   5   86.18   14.74   1 0.00000 0.00000 0.00000 0.00000 0.00000 0.00000
   1   5   7 1237.10   23.81  -2 0.00000 0.00000 0.00000 0.00000 0.00000 0.00000
  -3  -5  -5 1237.10   23.81   1 0.00000 0.00000 0.00000 0.00000 0.00000 0.00000
  -1  -5  -7 1331.22   41.95  -2 0.00000 0.00000 0.00000 0.00000 0.00000 0.00000
   3   5   5 1331.22   41.95   1 0.00000 0.00000 0.00000 0.00000 0.00000 0.00000
   0  -5 -10  967.23   38.55  -2 0.00000 0.00000 0.00000 0.00000 0.00000 0.00000
   5   5   5  967.23   38.55   1 0.00000 0.00000 0.00000 0.00000 0.00000 0.00000
   0   5  10 1078.35   20.41  -2 0.00000 0.00000 0.00000 0.00000 0.00000 0.00000
  -5  -5  -5 1078.35   20.41   1 0.00000 0.00000 0.00000 0.00000 0.00000 0.00000
  -1   5  13   -4.54   19.28  -2 0.00000 0.00000 0.00000 0.00000 0.00000 0.00000
  -7  -5  -5   -4.54   19.28   1 0.00000 0.00000 0.00000 0.00000 0.00000 0.00000
   1  -5 -13  -13.61   34.02  -2 0.00000 0.00000 0.00000 0.00000 0.00000 0.00000
   7   5   5  -13.61   34.02   1 0.00000 0.00000 0.00000 0.00000 0.00000 0.00000
  -5   6   5   55.56   13.61  -2 0.00000 0.00000 0.00000 0.00000 0.00000 0.00000
  -5  -6   5   55.56   13.61   1 0.00000 0.00000 0.00000 0.00000 0.00000 0.00000
   5  -6  -5   91.85   35.15  -2 0.00000 0.00000 0.00000 0.00000 0.00000 0.00000
   5   6  -5   91.85   35.15   1 0.00000 0.00000 0.00000 0.00000 0.00000 0.00000
  -4   6   2   -2.27    9.07  -2 0.00000 0.00000 0.00000 0.00000 0.00000 0.00000
  -3  -6   5   -2.27    9.07   1 0.00000 0.00000 0.00000 0.00000 0.00000 0.00000
   4  -6  -2   -3.40   24.95  -2 0.00000 0.00000 0.00000 0.00000 0.00000 0.00000
   3   6  -5   -3.40   24.95   1 0.00000 0.00000 0.00000 0.00000 0.00000 0.00000
  -3   6  -1  417.28   12.47  -2 0.00000 0.00000 0.00000 0.00000 0.00000 0.00000
  -1  -6   5  417.28   12.47   1 0.00000 0.00000 0.00000 0.00000 0.00000 0.00000
   2   6   4 1098.76   21.54  -2 0.00000 0.00000 0.00000 0.00000 0.00000 0.00000
  -1  -6  -5 1098.76   21.54   1 0.00000 0.00000 0.00000 0.00000 0.00000 0.00000
   1   6   7  117.93    7.94  -2 0.00000 0.00000 0.00000 0.00000 0.00000 0.00000
  -3  -6  -5  117.93    7.94   1 0.00000 0.00000 0.00000 0.00000 0.00000 0.00000
  -1  -6  -7  119.06   30.62  -2 0.00000 0.00000 0.00000 0.00000 0.00000 0.00000
   3   6   5  119.06   30.62   1 0.00000 0.00000 0.00000 0.00000 0.00000 0.00000
   0   6  10  214.31   13.61  -2 0.00000 0.00000 0.00000 0.00000 0.00000 0.00000
  -5  -6  -5  214.31   13.61   1 0.00000 0.00000 0.00000 0.00000 0.00000 0.00000
   0  -6 -10  119.06   34.02  -2 0.00000 0.00000 0.00000 0.00000 0.00000 0.00000
   5   6   5  119.06   34.02   1 0.00000 0.00000 0.00000 0.00000 0.00000 0.00000
  -4   7   2  166.69   17.01  -2 0.00000 0.00000 0.00000 0.00000 0.00000 0.00000
  -3  -7   5  166.69   17.01   1 0.00000 0.00000 0.00000 0.00000 0.00000 0.00000
  -3   7  -1    9.07    5.67  -2 0.00000 0.00000 0.00000 0.00000 0.00000 0.00000
  -1  -7   5    9.07    5.67   1 0.00000 0.00000 0.00000 0.00000 0.00000 0.00000
   2   7   4  166.69   10.21  -2 0.00000 0.00000 0.00000 0.00000 0.00000 0.00000
  -1  -7  -5  166.69   10.21   1 0.00000 0.00000 0.00000 0.00000 0.00000 0.00000
   1   7   7  183.69   17.01  -2 0.00000 0.00000 0.00000 0.00000 0.00000 0.00000
  -3  -7  -5  183.69   17.01   1 0.00000 0.00000 0.00000 0.00000 0.00000 0.00000
   7   0  -9   30.62    9.07  -2 0.00000 0.00000 0.00000 0.00000 0.00000 0.00000
   8   0  -6   30.62    9.07   1 0.00000 0.00000 0.00000 0.00000 0.00000 0.00000
   6   0  -6 1002.38   23.81  -2 0.00000 0.00000 0.00000 0.00000 0.00000 0.00000
   6   0  -6 1002.38   23.81   1 0.00000 0.00000 0.00000 0.00000 0.00000 0.00000
   5   0  -3 3617.19   72.57  -2 0.00000 0.00000 0.00000 0.00000 0.00000 0.00000
   4   0  -6 3617.19   72.57   1 0.00000 0.00000 0.00000 0.00000 0.00000 0.00000
   4   0   0 1604.49   30.62  -2 0.00000 0.00000 0.00000 0.00000 0.00000 0.00000
   2   0  -6 1604.49   30.62   1 0.00000 0.00000 0.00000 0.00000 0.00000 0.00000
  -3   0  -3 3457.30   61.23  -2 0.00000 0.00000 0.00000 0.00000 0.00000 0.00000
   0   0   6 3457.30   61.23   1 0.00000 0.00000 0.00000 0.00000 0.00000 0.00000
  -2   0  -6 9999.99  145.14  -2 0.00000 0.00000 0.00000 0.00000 0.00000 0.00000
   2   0   6 9999.99  145.14   1 0.00000 0.00000 0.00000 0.00000 0.00000 0.00000
  -1   0  -9 1308.54   24.95  -2 0.00000 0.00000 0.00000 0.00000 0.00000 0.00000
   4   0   6 1308.54   24.95   1 0.00000 0.00000 0.00000 0.00000 0.00000 0.00000
   0   0 -12  353.78   11.34  -2 0.00000 0.00000 0.00000 0.00000 0.00000 0.00000
   6   0   6  353.78   11.34   1 0.00000 0.00000 0.00000 0.00000 0.00000 0.00000
   1   0 -15  866.31   22.68  -2 0.00000 0.00000 0.00000 0.00000 0.00000 0.00000
   8   0   6  866.31   22.68   1 0.00000 0.00000 0.00000 0.00000 0.00000 0.00000
  -7   1   9  432.02   17.01  -2 0.00000 0.00000 0.00000 0.00000 0.00000 0.00000
  -8  -1   6  432.02   17.01   1 0.00000 0.00000 0.00000 0.00000 0.00000 0.00000
   7  -1  -9  488.72   15.87  -2 0.00000 0.00000 0.00000 0.00000 0.00000 0.00000
   8   1  -6  488.72   15.87   1 0.00000 0.00000 0.00000 0.00000 0.00000 0.00000
  -6   1   6  468.31   13.61  -2 0.00000 0.00000 0.00000 0.00000 0.00000 0.00000
  -6  -1   6  468.31   13.61   1 0.00000 0.00000 0.00000 0.00000 0.00000 0.00000
   6  -1  -6  526.14   14.74  -2 0.00000 0.00000 0.00000 0.00000 0.00000 0.00000
   6   1  -6  526.14   14.74   1 0.00000 0.00000 0.00000 0.00000 0.00000 0.00000
  -5   1   3  374.19   13.61  -2 0.00000 0.00000 0.00000 0.00000 0.00000 0.00000
  -4  -1   6  374.19   13.61   1 0.00000 0.00000 0.00000 0.00000 0.00000 0.00000
   5  -1  -3  390.07   12.47  -2 0.00000 0.00000 0.00000 0.00000 0.00000 0.00000
   4   1  -6  390.07   12.47   1 0.00000 0.00000 0.00000 0.00000 0.00000 0.00000
  -4   1   0 5293.11   97.52  -2 0.00000 0.00000 0.00000 0.00000 0.00000 0.00000
  -2  -1   6 5293.11   97.52   1 0.00000 0.00000 0.00000 0.00000 0.00000 0.00000
   4  -1   0 5152.51   79.37  -2 0.00000 0.00000 0.00000 0.00000 0.00000 0.00000
   2   1  -6 5152.51   79.37   1 0.00000 0.00000 0.00000 0.00000 0.00000 0.00000
   3   1   3 3301.96   56.70  -2 0.00000 0.00000 0.00000 0.00000 0.00000 0.00000
   0  -1  -6 3301.96   56.70   1 0.00000 0.00000 0.00000 0.00000 0.00000 0.00000
  -3  -1  -3 3224.85   73.70  -2 0.00000 0.00000 0.00000 0.00000 0.00000 0.00000
   0   1   6 3224.85   73.70   1 0.00000 0.00000 0.00000 0.00000 0.00000 0.00000
   2   1   6    1.13    4.54  -2 0.00000 0.00000 0.00000 0.00000 0.00000 0.00000
  -2  -1  -6    1.13    4.54   1 0.00000 0.00000 0.00000 0.00000 0.00000 0.00000
  -2  -1  -6   -1.13    7.94  -2 0.00000 0.00000 0.00000 0.00000 0.00000 0.00000
   2   1   6   -1.13    7.94   1 0.00000 0.00000 0.00000 0.00000 0.00000 0.00000
   1   1   9 1908.38   36.29  -2 0.00000 0.00000 0.00000 0.00000 0.00000 0.00000
  -4  -1  -6 1908.38   36.29   1 0.00000 0.00000 0.00000 0.00000 0.00000 0.00000
  -1  -1  -9 2004.76   40.82  -2 0.00000 0.00000 0.00000 0.00000 0.00000 0.00000
   4   1   6 2004.76   40.82   1 0.00000 0.00000 0.00000 0.00000 0.00000 0.00000
   0   1  12 1793.85   35.15  -2 0.00000 0.00000 0.00000 0.00000 0.00000 0.00000
  -6  -1  -6 1793.85   35.15   1 0.00000 0.00000 0.00000 0.00000 0.00000 0.00000
   0  -1 -12 1724.68   37.42  -2 0.00000 0.00000 0.00000 0.00000 0.00000 0.00000
   6   1   6 1724.68   37.42   1 0.00000 0.00000 0.00000 0.00000 0.00000 0.00000
  -1   1  15   61.23    9.07  -2 0.00000 0.00000 0.00000 0.00000 0.00000 0.00000
  -8  -1  -6   61.23    9.07   1 0.00000 0.00000 0.00000 0.00000 0.00000 0.00000
   1  -1 -15   54.43    9.07  -2 0.00000 0.00000 0.00000 0.00000 0.00000 0.00000
   8   1   6   54.43    9.07   1 0.00000 0.00000 0.00000 0.00000 0.00000 0.00000
   7  -2  -9   37.42   11.34  -2 0.00000 0.00000 0.00000 0.00000 0.00000 0.00000
   8   2  -6   37.42   11.34   1 0.00000 0.00000 0.00000 0.00000 0.00000 0.00000
  -7   2   9   27.21    9.07  -2 0.00000 0.00000 0.00000 0.00000 0.00000 0.00000
  -8  -2   6   27.21    9.07   1 0.00000 0.00000 0.00000 0.00000 0.00000 0.00000
  -6   2   6  656.54   18.14  -2 0.00000 0.00000 0.00000 0.00000 0.00000 0.00000
  -6  -2   6  656.54   18.14   1 0.00000 0.00000 0.00000 0.00000 0.00000 0.00000
   6  -2  -6  666.74   26.08  -2 0.00000 0.00000 0.00000 0.00000 0.00000 0.00000
   6   2  -6  666.74   26.08   1 0.00000 0.00000 0.00000 0.00000 0.00000 0.00000
  -5   2   3 1036.40   27.21  -2 0.00000 0.00000 0.00000 0.00000 0.00000 0.00000
  -4  -2   6 1036.40   27.21   1 0.00000 0.00000 0.00000 0.00000 0.00000 0.00000
   5  -2  -3 1001.25   23.81  -2 0.00000 0.00000 0.00000 0.00000 0.00000 0.00000
   4   2  -6 1001.25   23.81   1 0.00000 0.00000 0.00000 0.00000 0.00000 0.00000
  -4   2   0  233.59    6.80  -2 0.00000 0.00000 0.00000 0.00000 0.00000 0.00000
  -2  -2   6  233.59    6.80   1 0.00000 0.00000 0.00000 0.00000 0.00000 0.00000
   4  -2   0  216.58    9.07  -2 0.00000 0.00000 0.00000 0.00000 0.00000 0.00000
   2   2  -6  216.58    9.07   1 0.00000 0.00000 0.00000 0.00000 0.00000 0.00000
   3   2   3 1444.61   24.95  -2 0.00000 0.00000 0.00000 0.00000 0.00000 0.00000
   0  -2  -6 1444.61   24.95   1 0.00000 0.00000 0.00000 0.00000 0.00000 0.00000
  -3  -2  -3 1452.54   32.88  -2 0.00000 0.00000 0.00000 0.00000 0.00000 0.00000
   0   2   6 1452.54   32.88   1 0.00000 0.00000 0.00000 0.00000 0.00000 0.00000
   2   2   6 3561.63   58.96  -2 0.00000 0.00000 0.00000 0.00000 0.00000 0.00000
  -2  -2  -6 3561.63   58.96   1 0.00000 0.00000 0.00000 0.00000 0.00000 0.00000
  -2  -2  -6 3713.57   75.97  -2 0.00000 0.00000 0.00000 0.00000 0.00000 0.00000
   2   2   6 3713.57   75.97   1 0.00000 0.00000 0.00000 0.00000 0.00000 0.00000
   1   2   9  520.47   13.61  -2 0.00000 0.00000 0.00000 0.00000 0.00000 0.00000
  -4  -2  -6  520.47   13.61   1 0.00000 0.00000 0.00000 0.00000 0.00000 0.00000
  -1  -2  -9  570.36   19.28  -2 0.00000 0.00000 0.00000 0.00000 0.00000 0.00000
   4   2   6  570.36   19.28   1 0.00000 0.00000 0.00000 0.00000 0.00000 0.00000
   0   2  12   54.43    7.94  -2 0.00000 0.00000 0.00000 0.00000 0.00000 0.00000
  -6  -2  -6   54.43    7.94   1 0.00000 0.00000 0.00000 0.00000 0.00000 0.00000
   0  -2 -12   44.22   11.34  -2 0.00000 0.00000 0.00000 0.00000 0.00000 0.00000
   6   2   6   44.22   11.34   1 0.00000 0.00000 0.00000 0.00000 0.00000 0.00000
  -1   2  15  246.06   15.87  -2 0.00000 0.00000 0.00000 0.00000 0.00000 0.00000
  -8  -2  -6  246.06   15.87   1 0.00000 0.00000 0.00000 0.00000 0.00000 0.00000
   1  -2 -15  265.34   19.28  -2 0.00000 0.00000 0.00000 0.00000 0.00000 0.00000
   8   2   6  265.34   19.28   1 0.00000 0.00000 0.00000 0.00000 0.00000 0.00000
  -7   3   9   64.63   11.34  -2 0.00000 0.00000 0.00000 0.00000 0.00000 0.00000
  -8  -3   6   64.63   11.34   1 0.00000 0.00000 0.00000 0.00000 0.00000 0.00000
   6  -3  -6    1.13   19.28  -2 0.00000 0.00000 0.00000 0.00000 0.00000 0.00000
   6   3  -6    1.13   19.28   1 0.00000 0.00000 0.00000 0.00000 0.00000 0.00000
  -6   3   6   14.74    7.94  -2 0.00000 0.00000 0.00000 0.00000 0.00000 0.00000
  -6  -3   6   14.74    7.94   1 0.00000 0.00000 0.00000 0.00000 0.00000 0.00000
  -5   3   3  480.78   21.54  -2 0.00000 0.00000 0.00000 0.00000 0.00000 0.00000
  -4  -3   6  480.78   21.54   1 0.00000 0.00000 0.00000 0.00000 0.00000 0.00000
   5  -3  -3  441.09   27.21  -2 0.00000 0.00000 0.00000 0.00000 0.00000 0.00000
   4   3  -6  441.09   27.21   1 0.00000 0.00000 0.00000 0.00000 0.00000 0.00000
  -4   3   0  827.76   15.87  -2 0.00000 0.00000 0.00000 0.00000 0.00000 0.00000
  -2  -3   6  827.76   15.87   1 0.00000 0.00000 0.00000 0.00000 0.00000 0.00000
   4  -3   0  818.69   26.08  -2 0.00000 0.00000 0.00000 0.00000 0.00000 0.00000
   2   3  -6  818.69   26.08   1 0.00000 0.00000 0.00000 0.00000 0.00000 0.00000
   3   3   3  123.60    7.94  -2 0.00000 0.00000 0.00000 0.00000 0.00000 0.00000
   0  -3  -6  123.60    7.94   1 0.00000 0.00000 0.00000 0.00000 0.00000 0.00000
  -3  -3  -3  138.34    7.94  -2 0.00000 0.00000 0.00000 0.00000 0.00000 0.00000
   0   3   6  138.34    7.94   1 0.00000 0.00000 0.00000 0.00000 0.00000 0.00000
   2   3   6   13.61    7.94  -2 0.00000 0.00000 0.00000 0.00000 0.00000 0.00000
  -2  -3  -6   13.61    7.94   1 0.00000 0.00000 0.00000 0.00000 0.00000 0.00000
  -2  -3  -6    3.40    5.67  -2 0.00000 0.00000 0.00000 0.00000 0.00000 0.00000
   2   3   6    3.40    5.67   1 0.00000 0.00000 0.00000 0.00000 0.00000 0.00000
   1   3   9  144.01    7.94  -2 0.00000 0.00000 0.00000 0.00000 0.00000 0.00000
  -4  -3  -6  144.01    7.94   1 0.00000 0.00000 0.00000 0.00000 0.00000 0.00000
  -1  -3  -9  153.08   11.34  -2 0.00000 0.00000 0.00000 0.00000 0.00000 0.00000
   4   3   6  153.08   11.34   1 0.00000 0.00000 0.00000 0.00000 0.00000 0.00000
   0   3  12  344.71   15.87  -2 0.00000 0.00000 0.00000 0.00000 0.00000 0.00000
  -6  -3  -6  344.71   15.87   1 0.00000 0.00000 0.00000 0.00000 0.00000 0.00000
   0  -3 -12  356.05   18.14  -2 0.00000 0.00000 0.00000 0.00000 0.00000 0.00000
   6   3   6  356.05   18.14   1 0.00000 0.00000 0.00000 0.00000 0.00000 0.00000
   1  -3 -15   87.31   15.87  -2 0.00000 0.00000 0.00000 0.00000 0.00000 0.00000
   8   3   6   87.31   15.87   1 0.00000 0.00000 0.00000 0.00000 0.00000 0.00000
  -1   3  15   96.38   14.74  -2 0.00000 0.00000 0.00000 0.00000 0.00000 0.00000
  -8  -3  -6   96.38   14.74   1 0.00000 0.00000 0.00000 0.00000 0.00000 0.00000
  -7   4   9  207.51   18.14  -2 0.00000 0.00000 0.00000 0.00000 0.00000 0.00000
  -8  -4   6  207.51   18.14   1 0.00000 0.00000 0.00000 0.00000 0.00000 0.00000
  -6   4   6  256.26   12.47  -2 0.00000 0.00000 0.00000 0.00000 0.00000 0.00000
  -6  -4   6  256.26   12.47   1 0.00000 0.00000 0.00000 0.00000 0.00000 0.00000
   6  -4  -6  219.98   28.35  -2 0.00000 0.00000 0.00000 0.00000 0.00000 0.00000
   6   4  -6  219.98   28.35   1 0.00000 0.00000 0.00000 0.00000 0.00000 0.00000
  -5   4   3    4.54   11.34  -2 0.00000 0.00000 0.00000 0.00000 0.00000 0.00000
  -4  -4   6    4.54   11.34   1 0.00000 0.00000 0.00000 0.00000 0.00000 0.00000
   5  -4  -3    4.54   15.87  -2 0.00000 0.00000 0.00000 0.00000 0.00000 0.00000
   4   4  -6    4.54   15.87   1 0.00000 0.00000 0.00000 0.00000 0.00000 0.00000
  -4   4   0   97.52    4.54  -2 0.00000 0.00000 0.00000 0.00000 0.00000 0.00000
  -2  -4   6   97.52    4.54   1 0.00000 0.00000 0.00000 0.00000 0.00000 0.00000
   4  -4   0  104.32   10.21  -2 0.00000 0.00000 0.00000 0.00000 0.00000 0.00000
   2   4  -6  104.32   10.21   1 0.00000 0.00000 0.00000 0.00000 0.00000 0.00000
  -3  -4  -3  204.10   10.21  -2 0.00000 0.00000 0.00000 0.00000 0.00000 0.00000
   0   4   6  204.10   10.21   1 0.00000 0.00000 0.00000 0.00000 0.00000 0.00000
   3   4   3  172.35   11.34  -2 0.00000 0.00000 0.00000 0.00000 0.00000 0.00000
   0  -4  -6  172.35   11.34   1 0.00000 0.00000 0.00000 0.00000 0.00000 0.00000
   2   4   6  149.68    6.80  -2 0.00000 0.00000 0.00000 0.00000 0.00000 0.00000
  -2  -4  -6  149.68    6.80   1 0.00000 0.00000 0.00000 0.00000 0.00000 0.00000
  -2  -4  -6  179.16   13.61  -2 0.00000 0.00000 0.00000 0.00000 0.00000 0.00000
   2   4   6  179.16   13.61   1 0.00000 0.00000 0.00000 0.00000 0.00000 0.00000
   1   4   9   44.22    6.80  -2 0.00000 0.00000 0.00000 0.00000 0.00000 0.00000
  -4  -4  -6   44.22    6.80   1 0.00000 0.00000 0.00000 0.00000 0.00000 0.00000
  -1  -4  -9   43.09   14.74  -2 0.00000 0.00000 0.00000 0.00000 0.00000 0.00000
   4   4   6   43.09   14.74   1 0.00000 0.00000 0.00000 0.00000 0.00000 0.00000
   0  -4 -12   54.43   11.34  -2 0.00000 0.00000 0.00000 0.00000 0.00000 0.00000
   6   4   6   54.43   11.34   1 0.00000 0.00000 0.00000 0.00000 0.00000 0.00000
   0   4  12   54.43    9.07  -2 0.00000 0.00000 0.00000 0.00000 0.00000 0.00000
  -6  -4  -6   54.43    9.07   1 0.00000 0.00000 0.00000 0.00000 0.00000 0.00000
   6  -5  -6   82.78   40.82  -2 0.00000 0.00000 0.00000 0.00000 0.00000 0.00000
   6   5  -6   82.78   40.82   1 0.00000 0.00000 0.00000 0.00000 0.00000 0.00000
  -6   5   6   82.78   13.61  -2 0.00000 0.00000 0.00000 0.00000 0.00000 0.00000
  -6  -5   6   82.78   13.61   1 0.00000 0.00000 0.00000 0.00000 0.00000 0.00000
  -5   5   3  297.09   15.87  -2 0.00000 0.00000 0.00000 0.00000 0.00000 0.00000
  -4  -5   6  297.09   15.87   1 0.00000 0.00000 0.00000 0.00000 0.00000 0.00000
   5  -5  -3  301.62   26.08  -2 0.00000 0.00000 0.00000 0.00000 0.00000 0.00000
   4   5  -6  301.62   26.08   1 0.00000 0.00000 0.00000 0.00000 0.00000 0.00000
  -4   5   0  145.14    5.67  -2 0.00000 0.00000 0.00000 0.00000 0.00000 0.00000
  -2  -5   6  145.14    5.67   1 0.00000 0.00000 0.00000 0.00000 0.00000 0.00000
   4  -5   0  181.43   14.74  -2 0.00000 0.00000 0.00000 0.00000 0.00000 0.00000
   2   5  -6  181.43   14.74   1 0.00000 0.00000 0.00000 0.00000 0.00000 0.00000
   3   5   3   -1.13    7.94  -2 0.00000 0.00000 0.00000 0.00000 0.00000 0.00000
   0  -5  -6   -1.13    7.94   1 0.00000 0.00000 0.00000 0.00000 0.00000 0.00000
  -3  -5  -3   -2.27   15.87  -2 0.00000 0.00000 0.00000 0.00000 0.00000 0.00000
   0   5   6   -2.27   15.87   1 0.00000 0.00000 0.00000 0.00000 0.00000 0.00000
   2   5   6   -2.27    7.94  -2 0.00000 0.00000 0.00000 0.00000 0.00000 0.00000
  -2  -5  -6   -2.27    7.94   1 0.00000 0.00000 0.00000 0.00000 0.00000 0.00000
  -2  -5  -6    7.94   13.61  -2 0.00000 0.00000 0.00000 0.00000 0.00000 0.00000
   2   5   6    7.94   13.61   1 0.00000 0.00000 0.00000 0.00000 0.00000 0.00000
   1   5   9    4.54    6.80  -2 0.00000 0.00000 0.00000 0.00000 0.00000 0.00000
  -4  -5  -6    4.54    6.80   1 0.00000 0.00000 0.00000 0.00000 0.00000 0.00000
  -1  -5  -9   -6.80   14.74  -2 0.00000 0.00000 0.00000 0.00000 0.00000 0.00000
   4   5   6   -6.80   14.74   1 0.00000 0.00000 0.00000 0.00000 0.00000 0.00000
   0   5  12   51.03   10.21  -2 0.00000 0.00000 0.00000 0.00000 0.00000 0.00000
  -6  -5  -6   51.03   10.21   1 0.00000 0.00000 0.00000 0.00000 0.00000 0.00000
   0  -5 -12   73.70   17.01  -2 0.00000 0.00000 0.00000 0.00000 0.00000 0.00000
   6   5   6   73.70   17.01   1 0.00000 0.00000 0.00000 0.00000 0.00000 0.00000
  -5   6   3   11.34   12.47  -2 0.00000 0.00000 0.00000 0.00000 0.00000 0.00000
  -4  -6   6   11.34   12.47   1 0.00000 0.00000 0.00000 0.00000 0.00000 0.00000
   5  -6  -3   22.68   21.54  -2 0.00000 0.00000 0.00000 0.00000 0.00000 0.00000
   4   6  -6   22.68   21.54   1 0.00000 0.00000 0.00000 0.00000 0.00000 0.00000
  -4   6   0   31.75    4.54  -2 0.00000 0.00000 0.00000 0.00000 0.00000 0.00000
  -2  -6   6   31.75    4.54   1 0.00000 0.00000 0.00000 0.00000 0.00000 0.00000
   3   6   3  107.72    9.07  -2 0.00000 0.00000 0.00000 0.00000 0.00000 0.00000
   0  -6  -6  107.72    9.07   1 0.00000 0.00000 0.00000 0.00000 0.00000 0.00000
  -2  -6  -6  121.33   32.88  -2 0.00000 0.00000 0.00000 0.00000 0.00000 0.00000
   2   6   6  121.33   32.88   1 0.00000 0.00000 0.00000 0.00000 0.00000 0.00000
   2   6   6  137.20    7.94  -2 0.00000 0.00000 0.00000 0.00000 0.00000 0.00000
  -2  -6  -6  137.20    7.94   1 0.00000 0.00000 0.00000 0.00000 0.00000 0.00000
   1   6   9   32.88    9.07  -2 0.00000 0.00000 0.00000 0.00000 0.00000 0.00000
  -4  -6  -6   32.88    9.07   1 0.00000 0.00000 0.00000 0.00000 0.00000 0.00000
  -1  -6  -9   30.62   31.75  -2 0.00000 0.00000 0.00000 0.00000 0.00000 0.00000
   4   6   6   30.62   31.75   1 0.00000 0.00000 0.00000 0.00000 0.00000 0.00000
  -4   7   0  425.22   22.68  -2 0.00000 0.00000 0.00000 0.00000 0.00000 0.00000
  -2  -7   6  425.22   22.68   1 0.00000 0.00000 0.00000 0.00000 0.00000 0.00000
   3   7   3  214.31   11.34  -2 0.00000 0.00000 0.00000 0.00000 0.00000 0.00000
   0  -7  -6  214.31   11.34   1 0.00000 0.00000 0.00000 0.00000 0.00000 0.00000
   2   7   6  -10.21   10.21  -2 0.00000 0.00000 0.00000 0.00000 0.00000 0.00000
  -2  -7  -6  -10.21   10.21   1 0.00000 0.00000 0.00000 0.00000 0.00000 0.00000
   8   0 -10   10.21   13.61  -2 0.00000 0.00000 0.00000 0.00000 0.00000 0.00000
   9   0  -7   10.21   13.61   1 0.00000 0.00000 0.00000 0.00000 0.00000 0.00000
   7   0  -7  179.16   10.21  -2 0.00000 0.00000 0.00000 0.00000 0.00000 0.00000
   7   0  -7  179.16   10.21   1 0.00000 0.00000 0.00000 0.00000 0.00000 0.00000
   6   0  -4   26.08    7.94  -2 0.00000 0.00000 0.00000 0.00000 0.00000 0.00000
   5   0  -7   26.08    7.94   1 0.00000 0.00000 0.00000 0.00000 0.00000 0.00000
   5   0  -1   86.18    7.94  -2 0.00000 0.00000 0.00000 0.00000 0.00000 0.00000
   3   0  -7   86.18    7.94   1 0.00000 0.00000 0.00000 0.00000 0.00000 0.00000
   4   0   2  276.68    9.07  -2 0.00000 0.00000 0.00000 0.00000 0.00000 0.00000
   1   0  -7  276.68    9.07   1 0.00000 0.00000 0.00000 0.00000 0.00000 0.00000
  -3   0  -5 1027.33   22.68  -2 0.00000 0.00000 0.00000 0.00000 0.00000 0.00000
   1   0   7 1027.33   22.68   1 0.00000 0.00000 0.00000 0.00000 0.00000 0.00000
  -2   0  -8  136.07    6.80  -2 0.00000 0.00000 0.00000 0.00000 0.00000 0.00000
   3   0   7  136.07    6.80   1 0.00000 0.00000 0.00000 0.00000 0.00000 0.00000
  -1   0 -11  501.19   15.87  -2 0.00000 0.00000 0.00000 0.00000 0.00000 0.00000
   5   0   7  501.19   15.87   1 0.00000 0.00000 0.00000 0.00000 0.00000 0.00000
   0   0 -14 1266.58   30.62  -2 0.00000 0.00000 0.00000 0.00000 0.00000 0.00000
   7   0   7 1266.58   30.62   1 0.00000 0.00000 0.00000 0.00000 0.00000 0.00000
  -8   1  10   61.23   14.74  -2 0.00000 0.00000 0.00000 0.00000 0.00000 0.00000
  -9  -1   7   61.23   14.74   1 0.00000 0.00000 0.00000 0.00000 0.00000 0.00000
  -7   1   7   31.75    9.07  -2 0.00000 0.00000 0.00000 0.00000 0.00000 0.00000
  -7  -1   7   31.75    9.07   1 0.00000 0.00000 0.00000 0.00000 0.00000 0.00000
   7  -1  -7   28.35    6.80  -2 0.00000 0.00000 0.00000 0.00000 0.00000 0.00000
   7   1  -7   28.35    6.80   1 0.00000 0.00000 0.00000 0.00000 0.00000 0.00000
  -6   1   4   54.43    9.07  -2 0.00000 0.00000 0.00000 0.00000 0.00000 0.00000
  -5  -1   7   54.43    9.07   1 0.00000 0.00000 0.00000 0.00000 0.00000 0.00000
   6  -1  -4   53.29    7.94  -2 0.00000 0.00000 0.00000 0.00000 0.00000 0.00000
   5   1  -7   53.29    7.94   1 0.00000 0.00000 0.00000 0.00000 0.00000 0.00000
  -5   1   1    9.07    5.67  -2 0.00000 0.00000 0.00000 0.00000 0.00000 0.00000
  -3  -1   7    9.07    5.67   1 0.00000 0.00000 0.00000 0.00000 0.00000 0.00000
   5  -1  -1    6.80    5.67  -2 0.00000 0.00000 0.00000 0.00000 0.00000 0.00000
   3   1  -7    6.80    5.67   1 0.00000 0.00000 0.00000 0.00000 0.00000 0.00000
  -4   1  -2    1.13    5.67  -2 0.00000 0.00000 0.00000 0.00000 0.00000 0.00000
  -1  -1   7    1.13    5.67   1 0.00000 0.00000 0.00000 0.00000 0.00000 0.00000
   4  -1   2   -1.13    6.80  -2 0.00000 0.00000 0.00000 0.00000 0.00000 0.00000
   1   1  -7   -1.13    6.80   1 0.00000 0.00000 0.00000 0.00000 0.00000 0.00000
   3   1   5  206.37    7.94  -2 0.00000 0.00000 0.00000 0.00000 0.00000 0.00000
  -1  -1  -7  206.37    7.94   1 0.00000 0.00000 0.00000 0.00000 0.00000 0.00000
  -3  -1  -5  197.30   11.34  -2 0.00000 0.00000 0.00000 0.00000 0.00000 0.00000
   1   1   7  197.30   11.34   1 0.00000 0.00000 0.00000 0.00000 0.00000 0.00000
   2   1   8 1391.31   24.95  -2 0.00000 0.00000 0.00000 0.00000 0.00000 0.00000
  -3  -1  -7 1391.31   24.95   1 0.00000 0.00000 0.00000 0.00000 0.00000 0.00000
  -2  -1  -8 1418.53   35.15  -2 0.00000 0.00000 0.00000 0.00000 0.00000 0.00000
   3   1   7 1418.53   35.15   1 0.00000 0.00000 0.00000 0.00000 0.00000 0.00000
   1   1  11  319.76   12.47  -2 0.00000 0.00000 0.00000 0.00000 0.00000 0.00000
  -5  -1  -7  319.76   12.47   1 0.00000 0.00000 0.00000 0.00000 0.00000 0.00000
  -1  -1 -11  349.25   17.01  -2 0.00000 0.00000 0.00000 0.00000 0.00000 0.00000
   5   1   7  349.25   17.01   1 0.00000 0.00000 0.00000 0.00000 0.00000 0.00000
   0   1  14   58.96   10.21  -2 0.00000 0.00000 0.00000 0.00000 0.00000 0.00000
  -7  -1  -7   58.96   10.21   1 0.00000 0.00000 0.00000 0.00000 0.00000 0.00000
   0  -1 -14   64.63   11.34  -2 0.00000 0.00000 0.00000 0.00000 0.00000 0.00000
   7   1   7   64.63   11.34   1 0.00000 0.00000 0.00000 0.00000 0.00000 0.00000
  -8   2  10   26.08   15.87  -2 0.00000 0.00000 0.00000 0.00000 0.00000 0.00000
  -9  -2   7   26.08   15.87   1 0.00000 0.00000 0.00000 0.00000 0.00000 0.00000
   7  -2  -7   18.14   12.47  -2 0.00000 0.00000 0.00000 0.00000 0.00000 0.00000
   7   2  -7   18.14   12.47   1 0.00000 0.00000 0.00000 0.00000 0.00000 0.00000
  -7   2   7   20.41    9.07  -2 0.00000 0.00000 0.00000 0.00000 0.00000 0.00000
  -7  -2   7   20.41    9.07   1 0.00000 0.00000 0.00000 0.00000 0.00000 0.00000
  -6   2   4  162.15   11.34  -2 0.00000 0.00000 0.00000 0.00000 0.00000 0.00000
  -5  -2   7  162.15   11.34   1 0.00000 0.00000 0.00000 0.00000 0.00000 0.00000
   6  -2  -4  170.09    6.80  -2 0.00000 0.00000 0.00000 0.00000 0.00000 0.00000
   5   2  -7  170.09    6.80   1 0.00000 0.00000 0.00000 0.00000 0.00000 0.00000
  -5   2   1  291.42   11.34  -2 0.00000 0.00000 0.00000 0.00000 0.00000 0.00000
  -3  -2   7  291.42   11.34   1 0.00000 0.00000 0.00000 0.00000 0.00000 0.00000
   5  -2  -1  268.74   10.21  -2 0.00000 0.00000 0.00000 0.00000 0.00000 0.00000
   3   2  -7  268.74   10.21   1 0.00000 0.00000 0.00000 0.00000 0.00000 0.00000
  -4   2  -2  587.37   12.47  -2 0.00000 0.00000 0.00000 0.00000 0.00000 0.00000
  -1  -2   7  587.37   12.47   1 0.00000 0.00000 0.00000 0.00000 0.00000 0.00000
   4  -2   2  536.34   15.87  -2 0.00000 0.00000 0.00000 0.00000 0.00000 0.00000
   1   2  -7  536.34   15.87   1 0.00000 0.00000 0.00000 0.00000 0.00000 0.00000
   3   2   5   64.63    6.80  -2 0.00000 0.00000 0.00000 0.00000 0.00000 0.00000
  -1  -2  -7   64.63    6.80   1 0.00000 0.00000 0.00000 0.00000 0.00000 0.00000
  -3  -2  -5   61.23    5.67  -2 0.00000 0.00000 0.00000 0.00000 0.00000 0.00000
   1   2   7   61.23    5.67   1 0.00000 0.00000 0.00000 0.00000 0.00000 0.00000
   2   2   8  133.80    6.80  -2 0.00000 0.00000 0.00000 0.00000 0.00000 0.00000
  -3  -2  -7  133.80    6.80   1 0.00000 0.00000 0.00000 0.00000 0.00000 0.00000
  -2  -2  -8  148.54   10.21  -2 0.00000 0.00000 0.00000 0.00000 0.00000 0.00000
   3   2   7  148.54   10.21   1 0.00000 0.00000 0.00000 0.00000 0.00000 0.00000
   1   2  11  488.72   15.87  -2 0.00000 0.00000 0.00000 0.00000 0.00000 0.00000
  -5  -2  -7  488.72   15.87   1 0.00000 0.00000 0.00000 0.00000 0.00000 0.00000
  -1  -2 -11  522.73   21.54  -2 0.00000 0.00000 0.00000 0.00000 0.00000 0.00000
   5   2   7  522.73   21.54   1 0.00000 0.00000 0.00000 0.00000 0.00000 0.00000
   0   2  14  435.42   18.14  -2 0.00000 0.00000 0.00000 0.00000 0.00000 0.00000
  -7  -2  -7  435.42   18.14   1 0.00000 0.00000 0.00000 0.00000 0.00000 0.00000
   0  -2 -14  424.08   20.41  -2 0.00000 0.00000 0.00000 0.00000 0.00000 0.00000
   7   2   7  424.08   20.41   1 0.00000 0.00000 0.00000 0.00000 0.00000 0.00000
  -7   3   7  422.95   17.01  -2 0.00000 0.00000 0.00000 0.00000 0.00000 0.00000
  -7  -3   7  422.95   17.01   1 0.00000 0.00000 0.00000 0.00000 0.00000 0.00000
   7  -3  -7  396.87   37.42  -2 0.00000 0.00000 0.00000 0.00000 0.00000 0.00000
   7   3  -7  396.87   37.42   1 0.00000 0.00000 0.00000 0.00000 0.00000 0.00000
  -6   3   4  716.63   24.95  -2 0.00000 0.00000 0.00000 0.00000 0.00000 0.00000
  -5  -3   7  716.63   24.95   1 0.00000 0.00000 0.00000 0.00000 0.00000 0.00000
   6  -3  -4  662.21   35.15  -2 0.00000 0.00000 0.00000 0.00000 0.00000 0.00000
   5   3  -7  662.21   35.15   1 0.00000 0.00000 0.00000 0.00000 0.00000 0.00000
   5  -3  -1   27.21    7.94  -2 0.00000 0.00000 0.00000 0.00000 0.00000 0.00000
   3   3  -7   27.21    7.94   1 0.00000 0.00000 0.00000 0.00000 0.00000 0.00000
  -5   3   1   14.74    6.80  -2 0.00000 0.00000 0.00000 0.00000 0.00000 0.00000
  -3  -3   7   14.74    6.80   1 0.00000 0.00000 0.00000 0.00000 0.00000 0.00000
  -4   3  -2 1150.92   21.54  -2 0.00000 0.00000 0.00000 0.00000 0.00000 0.00000
  -1  -3   7 1150.92   21.54   1 0.00000 0.00000 0.00000 0.00000 0.00000 0.00000
   4  -3   2 1174.74   26.08  -2 0.00000 0.00000 0.00000 0.00000 0.00000 0.00000
   1   3  -7 1174.74   26.08   1 0.00000 0.00000 0.00000 0.00000 0.00000 0.00000
   3   3   5 1374.30   26.08  -2 0.00000 0.00000 0.00000 0.00000 0.00000 0.00000
  -1  -3  -7 1374.30   26.08   1 0.00000 0.00000 0.00000 0.00000 0.00000 0.00000
  -3  -3  -5 1463.88   43.09  -2 0.00000 0.00000 0.00000 0.00000 0.00000 0.00000
   1   3   7 1463.88   43.09   1 0.00000 0.00000 0.00000 0.00000 0.00000 0.00000
   2   3   8  430.89   12.47  -2 0.00000 0.00000 0.00000 0.00000 0.00000 0.00000
  -3  -3  -7  430.89   12.47   1 0.00000 0.00000 0.00000 0.00000 0.00000 0.00000
  -2  -3  -8  486.45   18.14  -2 0.00000 0.00000 0.00000 0.00000 0.00000 0.00000
   3   3   7  486.45   18.14   1 0.00000 0.00000 0.00000 0.00000 0.00000 0.00000
   1   3  11   62.37    7.94  -2 0.00000 0.00000 0.00000 0.00000 0.00000 0.00000
  -5  -3  -7   62.37    7.94   1 0.00000 0.00000 0.00000 0.00000 0.00000 0.00000
  -1  -3 -11   90.71   12.47  -2 0.00000 0.00000 0.00000 0.00000 0.00000 0.00000
   5   3   7   90.71   12.47   1 0.00000 0.00000 0.00000 0.00000 0.00000 0.00000
   0   3  14  239.26   18.14  -2 0.00000 0.00000 0.00000 0.00000 0.00000 0.00000
  -7  -3  -7  239.26   18.14   1 0.00000 0.00000 0.00000 0.00000 0.00000 0.00000
   0  -3 -14  238.12   19.28  -2 0.00000 0.00000 0.00000 0.00000 0.00000 0.00000
   7   3   7  238.12   19.28   1 0.00000 0.00000 0.00000 0.00000 0.00000 0.00000
  -7   4   7   26.08   11.34  -2 0.00000 0.00000 0.00000 0.00000 0.00000 0.00000
  -7  -4   7   26.08   11.34   1 0.00000 0.00000 0.00000 0.00000 0.00000 0.00000
   7  -4  -7    4.54   37.42  -2 0.00000 0.00000 0.00000 0.00000 0.00000 0.00000
   7   4  -7    4.54   37.42   1 0.00000 0.00000 0.00000 0.00000 0.00000 0.00000
  -6   4   4  493.25   18.14  -2 0.00000 0.00000 0.00000 0.00000 0.00000 0.00000
  -5  -4   7  493.25   18.14   1 0.00000 0.00000 0.00000 0.00000 0.00000 0.00000
   6  -4  -4  411.61   32.88  -2 0.00000 0.00000 0.00000 0.00000 0.00000 0.00000
   5   4  -7  411.61   32.88   1 0.00000 0.00000 0.00000 0.00000 0.00000 0.00000
  -5   4   1 1801.79   39.69  -2 0.00000 0.00000 0.00000 0.00000 0.00000 0.00000
  -3  -4   7 1801.79   39.69   1 0.00000 0.00000 0.00000 0.00000 0.00000 0.00000
   5  -4  -1 1748.50   97.52  -2 0.00000 0.00000 0.00000 0.00000 0.00000 0.00000
   3   4  -7 1748.50   97.52   1 0.00000 0.00000 0.00000 0.00000 0.00000 0.00000
  -4   4  -2  870.85   18.14  -2 0.00000 0.00000 0.00000 0.00000 0.00000 0.00000
  -1  -4   7  870.85   18.14   1 0.00000 0.00000 0.00000 0.00000 0.00000 0.00000
   4  -4   2  919.60   23.81  -2 0.00000 0.00000 0.00000 0.00000 0.00000 0.00000
   1   4  -7  919.60   23.81   1 0.00000 0.00000 0.00000 0.00000 0.00000 0.00000
   3   4   5  294.82   11.34  -2 0.00000 0.00000 0.00000 0.00000 0.00000 0.00000
  -1  -4  -7  294.82   11.34   1 0.00000 0.00000 0.00000 0.00000 0.00000 0.00000
  -3  -4  -5  325.43   15.87  -2 0.00000 0.00000 0.00000 0.00000 0.00000 0.00000
   1   4   7  325.43   15.87   1 0.00000 0.00000 0.00000 0.00000 0.00000 0.00000
   2   4   8 1298.33   27.21  -2 0.00000 0.00000 0.00000 0.00000 0.00000 0.00000
  -3  -4  -7 1298.33   27.21   1 0.00000 0.00000 0.00000 0.00000 0.00000 0.00000
  -2  -4  -8 1366.37   45.36  -2 0.00000 0.00000 0.00000 0.00000 0.00000 0.00000
   3   4   7 1366.37   45.36   1 0.00000 0.00000 0.00000 0.00000 0.00000 0.00000
   1   4  11  375.33   14.74  -2 0.00000 0.00000 0.00000 0.00000 0.00000 0.00000
  -5  -4  -7  375.33   14.74   1 0.00000 0.00000 0.00000 0.00000 0.00000 0.00000
  -1  -4 -11  369.66   19.28  -2 0.00000 0.00000 0.00000 0.00000 0.00000 0.00000
   5   4   7  369.66   19.28   1 0.00000 0.00000 0.00000 0.00000 0.00000 0.00000
   0   4  14    6.80   13.61  -2 0.00000 0.00000 0.00000 0.00000 0.00000 0.00000
  -7  -4  -7    6.80   13.61   1 0.00000 0.00000 0.00000 0.00000 0.00000 0.00000
   0  -4 -14    2.27   17.01  -2 0.00000 0.00000 0.00000 0.00000 0.00000 0.00000
   7   4   7    2.27   17.01   1 0.00000 0.00000 0.00000 0.00000 0.00000 0.00000
  -6   5   4  664.47   21.54  -2 0.00000 0.00000 0.00000 0.00000 0.00000 0.00000
  -5  -5   7  664.47   21.54   1 0.00000 0.00000 0.00000 0.00000 0.00000 0.00000
   6  -5  -4  510.26   35.15  -2 0.00000 0.00000 0.00000 0.00000 0.00000 0.00000
   5   5  -7  510.26   35.15   1 0.00000 0.00000 0.00000 0.00000 0.00000 0.00000
  -5   5   1   14.74   12.47  -2 0.00000 0.00000 0.00000 0.00000 0.00000 0.00000
  -3  -5   7   14.74   12.47   1 0.00000 0.00000 0.00000 0.00000 0.00000 0.00000
   5  -5  -1   28.35   15.87  -2 0.00000 0.00000 0.00000 0.00000 0.00000 0.00000
   3   5  -7   28.35   15.87   1 0.00000 0.00000 0.00000 0.00000 0.00000 0.00000
  -4   5  -2 1335.75   26.08  -2 0.00000 0.00000 0.00000 0.00000 0.00000 0.00000
  -1  -5   7 1335.75   26.08   1 0.00000 0.00000 0.00000 0.00000 0.00000 0.00000
   4  -5   2 1384.51   47.62  -2 0.00000 0.00000 0.00000 0.00000 0.00000 0.00000
   1   5  -7 1384.51   47.62   1 0.00000 0.00000 0.00000 0.00000 0.00000 0.00000
   3   5   5 1257.51   28.35  -2 0.00000 0.00000 0.00000 0.00000 0.00000 0.00000
  -1  -5  -7 1257.51   28.35   1 0.00000 0.00000 0.00000 0.00000 0.00000 0.00000
  -3  -5  -5 1241.64   43.09  -2 0.00000 0.00000 0.00000 0.00000 0.00000 0.00000
   1   5   7 1241.64   43.09   1 0.00000 0.00000 0.00000 0.00000 0.00000 0.00000
   2   5   8  132.67    9.07  -2 0.00000 0.00000 0.00000 0.00000 0.00000 0.00000
  -3  -5  -7  132.67    9.07   1 0.00000 0.00000 0.00000 0.00000 0.00000 0.00000
  -2  -5  -8  133.80   17.01  -2 0.00000 0.00000 0.00000 0.00000 0.00000 0.00000
   3   5   7  133.80   17.01   1 0.00000 0.00000 0.00000 0.00000 0.00000 0.00000
   1   5  11  217.71   14.74  -2 0.00000 0.00000 0.00000 0.00000 0.00000 0.00000
  -5  -5  -7  217.71   14.74   1 0.00000 0.00000 0.00000 0.00000 0.00000 0.00000
  -1  -5 -11  176.89   21.54  -2 0.00000 0.00000 0.00000 0.00000 0.00000 0.00000
   5   5   7  176.89   21.54   1 0.00000 0.00000 0.00000 0.00000 0.00000 0.00000
  -6   6   4  178.02   15.87  -2 0.00000 0.00000 0.00000 0.00000 0.00000 0.00000
  -5  -6   7  178.02   15.87   1 0.00000 0.00000 0.00000 0.00000 0.00000 0.00000
   6  -6  -4  199.57   32.88  -2 0.00000 0.00000 0.00000 0.00000 0.00000 0.00000
   5   6  -7  199.57   32.88   1 0.00000 0.00000 0.00000 0.00000 0.00000 0.00000
  -5   6   1  758.59   34.02  -2 0.00000 0.00000 0.00000 0.00000 0.00000 0.00000
  -3  -6   7  758.59   34.02   1 0.00000 0.00000 0.00000 0.00000 0.00000 0.00000
   5  -6  -1  878.78   44.22  -2 0.00000 0.00000 0.00000 0.00000 0.00000 0.00000
   3   6  -7  878.78   44.22   1 0.00000 0.00000 0.00000 0.00000 0.00000 0.00000
  -4   6  -2  439.96   12.47  -2 0.00000 0.00000 0.00000 0.00000 0.00000 0.00000
  -1  -6   7  439.96   12.47   1 0.00000 0.00000 0.00000 0.00000 0.00000 0.00000
   3   6   5  111.12    9.07  -2 0.00000 0.00000 0.00000 0.00000 0.00000 0.00000
  -1  -6  -7  111.12    9.07   1 0.00000 0.00000 0.00000 0.00000 0.00000 0.00000
  -3  -6  -5  119.06   32.88  -2 0.00000 0.00000 0.00000 0.00000 0.00000 0.00000
   1   6   7  119.06   32.88   1 0.00000 0.00000 0.00000 0.00000 0.00000 0.00000
   2   6   8  560.15   18.14  -2 0.00000 0.00000 0.00000 0.00000 0.00000 0.00000
  -3  -6  -7  560.15   18.14   1 0.00000 0.00000 0.00000 0.00000 0.00000 0.00000
  -2  -6  -8  500.06   30.62  -2 0.00000 0.00000 0.00000 0.00000 0.00000 0.00000
   3   6   7  500.06   30.62   1 0.00000 0.00000 0.00000 0.00000 0.00000 0.00000
  -4   7  -2  120.19   14.74  -2 0.00000 0.00000 0.00000 0.00000 0.00000 0.00000
  -1  -7   7  120.19   14.74   1 0.00000 0.00000 0.00000 0.00000 0.00000 0.00000
   3   7   5  180.29   11.34  -2 0.00000 0.00000 0.00000 0.00000 0.00000 0.00000
  -1  -7  -7  180.29   11.34   1 0.00000 0.00000 0.00000 0.00000 0.00000 0.00000
   8   0  -8  987.64   35.15  -2 0.00000 0.00000 0.00000 0.00000 0.00000 0.00000
   8   0  -8  987.64   35.15   1 0.00000 0.00000 0.00000 0.00000 0.00000 0.00000
   7   0  -5  437.69   15.87  -2 0.00000 0.00000 0.00000 0.00000 0.00000 0.00000
   6   0  -8  437.69   15.87   1 0.00000 0.00000 0.00000 0.00000 0.00000 0.00000
   6   0  -2  258.53   10.21  -2 0.00000 0.00000 0.00000 0.00000 0.00000 0.00000
   4   0  -8  258.53   10.21   1 0.00000 0.00000 0.00000 0.00000 0.00000 0.00000
   5   0   1 3506.06   63.50  -2 0.00000 0.00000 0.00000 0.00000 0.00000 0.00000
   2   0  -8 3506.06   63.50   1 0.00000 0.00000 0.00000 0.00000 0.00000 0.00000
  -4   0  -4 2137.43   40.82  -2 0.00000 0.00000 0.00000 0.00000 0.00000 0.00000
   0   0   8 2137.43   40.82   1 0.00000 0.00000 0.00000 0.00000 0.00000 0.00000
  -3   0  -7   89.58    6.80  -2 0.00000 0.00000 0.00000 0.00000 0.00000 0.00000
   2   0   8   89.58    6.80   1 0.00000 0.00000 0.00000 0.00000 0.00000 0.00000
  -2   0 -10  494.39   13.61  -2 0.00000 0.00000 0.00000 0.00000 0.00000 0.00000
   4   0   8  494.39   13.61   1 0.00000 0.00000 0.00000 0.00000 0.00000 0.00000
  -1   0 -13  103.19   10.21  -2 0.00000 0.00000 0.00000 0.00000 0.00000 0.00000
   6   0   8  103.19   10.21   1 0.00000 0.00000 0.00000 0.00000 0.00000 0.00000
   0   0 -16   -1.13   10.21  -2 0.00000 0.00000 0.00000 0.00000 0.00000 0.00000
   8   0   8   -1.13   10.21   1 0.00000 0.00000 0.00000 0.00000 0.00000 0.00000
  -8   1   8    0.00   11.34  -2 0.00000 0.00000 0.00000 0.00000 0.00000 0.00000
  -8  -1   8    0.00   11.34   1 0.00000 0.00000 0.00000 0.00000 0.00000 0.00000
   8  -1  -8   -2.27    7.94  -2 0.00000 0.00000 0.00000 0.00000 0.00000 0.00000
   8   1  -8   -2.27    7.94   1 0.00000 0.00000 0.00000 0.00000 0.00000 0.00000
   7  -1  -5  751.79   20.41  -2 0.00000 0.00000 0.00000 0.00000 0.00000 0.00000
   6   1  -8  751.79   20.41   1 0.00000 0.00000 0.00000 0.00000 0.00000 0.00000
  -7   1   5  701.89   21.54  -2 0.00000 0.00000 0.00000 0.00000 0.00000 0.00000
  -6  -1   8  701.89   21.54   1 0.00000 0.00000 0.00000 0.00000 0.00000 0.00000
  -6   1   2 1722.42   41.95  -2 0.00000 0.00000 0.00000 0.00000 0.00000 0.00000
  -4  -1   8 1722.42   41.95   1 0.00000 0.00000 0.00000 0.00000 0.00000 0.00000
   6  -1  -2 1652.11   40.82  -2 0.00000 0.00000 0.00000 0.00000 0.00000 0.00000
   4   1  -8 1652.11   40.82   1 0.00000 0.00000 0.00000 0.00000 0.00000 0.00000
   5  -1   1  212.04    7.94  -2 0.00000 0.00000 0.00000 0.00000 0.00000 0.00000
   2   1  -8  212.04    7.94   1 0.00000 0.00000 0.00000 0.00000 0.00000 0.00000
  -5   1  -1  232.45    9.07  -2 0.00000 0.00000 0.00000 0.00000 0.00000 0.00000
  -2  -1   8  232.45    9.07   1 0.00000 0.00000 0.00000 0.00000 0.00000 0.00000
   4   1   4  300.49   11.34  -2 0.00000 0.00000 0.00000 0.00000 0.00000 0.00000
   0  -1  -8  300.49   11.34   1 0.00000 0.00000 0.00000 0.00000 0.00000 0.00000
  -4  -1  -4  278.94   11.34  -2 0.00000 0.00000 0.00000 0.00000 0.00000 0.00000
   0   1   8  278.94   11.34   1 0.00000 0.00000 0.00000 0.00000 0.00000 0.00000
   3   1   7 1344.82   24.95  -2 0.00000 0.00000 0.00000 0.00000 0.00000 0.00000
  -2  -1  -8 1344.82   24.95   1 0.00000 0.00000 0.00000 0.00000 0.00000 0.00000
  -3  -1  -7 1355.03   30.62  -2 0.00000 0.00000 0.00000 0.00000 0.00000 0.00000
   2   1   8 1355.03   30.62   1 0.00000 0.00000 0.00000 0.00000 0.00000 0.00000
   2   1  10  510.26   14.74  -2 0.00000 0.00000 0.00000 0.00000 0.00000 0.00000
  -4  -1  -8  510.26   14.74   1 0.00000 0.00000 0.00000 0.00000 0.00000 0.00000
  -2  -1 -10  526.14   18.14  -2 0.00000 0.00000 0.00000 0.00000 0.00000 0.00000
   4   1   8  526.14   18.14   1 0.00000 0.00000 0.00000 0.00000 0.00000 0.00000
   1   1  13    5.67    7.94  -2 0.00000 0.00000 0.00000 0.00000 0.00000 0.00000
  -6  -1  -8    5.67    7.94   1 0.00000 0.00000 0.00000 0.00000 0.00000 0.00000
  -1  -1 -13    7.94   11.34  -2 0.00000 0.00000 0.00000 0.00000 0.00000 0.00000
   6   1   8    7.94   11.34   1 0.00000 0.00000 0.00000 0.00000 0.00000 0.00000
   0   1  16   13.61   14.74  -2 0.00000 0.00000 0.00000 0.00000 0.00000 0.00000
  -8  -1  -8   13.61   14.74   1 0.00000 0.00000 0.00000 0.00000 0.00000 0.00000
   0  -1 -16   13.61   15.87  -2 0.00000 0.00000 0.00000 0.00000 0.00000 0.00000
   8   1   8   13.61   15.87   1 0.00000 0.00000 0.00000 0.00000 0.00000 0.00000
  -8   2   8  307.29   20.41  -2 0.00000 0.00000 0.00000 0.00000 0.00000 0.00000
  -8  -2   8  307.29   20.41   1 0.00000 0.00000 0.00000 0.00000 0.00000 0.00000
  -7   2   5  307.29   13.61  -2 0.00000 0.00000 0.00000 0.00000 0.00000 0.00000
  -6  -2   8  307.29   13.61   1 0.00000 0.00000 0.00000 0.00000 0.00000 0.00000
   7  -2  -5  331.10   13.61  -2 0.00000 0.00000 0.00000 0.00000 0.00000 0.00000
   6   2  -8  331.10   13.61   1 0.00000 0.00000 0.00000 0.00000 0.00000 0.00000
  -6   2   2   -4.54   13.61  -2 0.00000 0.00000 0.00000 0.00000 0.00000 0.00000
  -4  -2   8   -4.54   13.61   1 0.00000 0.00000 0.00000 0.00000 0.00000 0.00000
   6  -2  -2   -7.94   13.61  -2 0.00000 0.00000 0.00000 0.00000 0.00000 0.00000
   4   2  -8   -7.94   13.61   1 0.00000 0.00000 0.00000 0.00000 0.00000 0.00000
  -5   2  -1 1025.06   21.54  -2 0.00000 0.00000 0.00000 0.00000 0.00000 0.00000
  -2  -2   8 1025.06   21.54   1 0.00000 0.00000 0.00000 0.00000 0.00000 0.00000
   5  -2   1 1048.87   29.48  -2 0.00000 0.00000 0.00000 0.00000 0.00000 0.00000
   2   2  -8 1048.87   29.48   1 0.00000 0.00000 0.00000 0.00000 0.00000 0.00000
   4   2   4 1780.25   37.42  -2 0.00000 0.00000 0.00000 0.00000 0.00000 0.00000
   0  -2  -8 1780.25   37.42   1 0.00000 0.00000 0.00000 0.00000 0.00000 0.00000
  -4  -2  -4 1696.34   38.55  -2 0.00000 0.00000 0.00000 0.00000 0.00000 0.00000
   0   2   8 1696.34   38.55   1 0.00000 0.00000 0.00000 0.00000 0.00000 0.00000
   3   2   7  168.95    7.94  -2 0.00000 0.00000 0.00000 0.00000 0.00000 0.00000
  -2  -2  -8  168.95    7.94   1 0.00000 0.00000 0.00000 0.00000 0.00000 0.00000
  -3  -2  -7  179.16   11.34  -2 0.00000 0.00000 0.00000 0.00000 0.00000 0.00000
   2   2   8  179.16   11.34   1 0.00000 0.00000 0.00000 0.00000 0.00000 0.00000
   2   2  10   37.42    6.80  -2 0.00000 0.00000 0.00000 0.00000 0.00000 0.00000
  -4  -2  -8   37.42    6.80   1 0.00000 0.00000 0.00000 0.00000 0.00000 0.00000
  -2  -2 -10   27.21   10.21  -2 0.00000 0.00000 0.00000 0.00000 0.00000 0.00000
   4   2   8   27.21   10.21   1 0.00000 0.00000 0.00000 0.00000 0.00000 0.00000
   1   2  13  191.63   11.34  -2 0.00000 0.00000 0.00000 0.00000 0.00000 0.00000
  -6  -2  -8  191.63   11.34   1 0.00000 0.00000 0.00000 0.00000 0.00000 0.00000
  -1  -2 -13  218.85   17.01  -2 0.00000 0.00000 0.00000 0.00000 0.00000 0.00000
   6   2   8  218.85   17.01   1 0.00000 0.00000 0.00000 0.00000 0.00000 0.00000
   0   2  16  133.80   17.01  -2 0.00000 0.00000 0.00000 0.00000 0.00000 0.00000
  -8  -2  -8  133.80   17.01   1 0.00000 0.00000 0.00000 0.00000 0.00000 0.00000
   0  -2 -16   88.45   20.41  -2 0.00000 0.00000 0.00000 0.00000 0.00000 0.00000
   8   2   8   88.45   20.41   1 0.00000 0.00000 0.00000 0.00000 0.00000 0.00000
  -8   3   8   37.42   13.61  -2 0.00000 0.00000 0.00000 0.00000 0.00000 0.00000
  -8  -3   8   37.42   13.61   1 0.00000 0.00000 0.00000 0.00000 0.00000 0.00000
  -7   3   5   13.61    9.07  -2 0.00000 0.00000 0.00000 0.00000 0.00000 0.00000
  -6  -3   8   13.61    9.07   1 0.00000 0.00000 0.00000 0.00000 0.00000 0.00000
   7  -3  -5  -11.34   22.68  -2 0.00000 0.00000 0.00000 0.00000 0.00000 0.00000
   6   3  -8  -11.34   22.68   1 0.00000 0.00000 0.00000 0.00000 0.00000 0.00000
  -6   3   2  404.81   13.61  -2 0.00000 0.00000 0.00000 0.00000 0.00000 0.00000
  -4  -3   8  404.81   13.61   1 0.00000 0.00000 0.00000 0.00000 0.00000 0.00000
   6  -3  -2  443.36   18.14  -2 0.00000 0.00000 0.00000 0.00000 0.00000 0.00000
   4   3  -8  443.36   18.14   1 0.00000 0.00000 0.00000 0.00000 0.00000 0.00000
  -5   3  -1  765.39   18.14  -2 0.00000 0.00000 0.00000 0.00000 0.00000 0.00000
  -2  -3   8  765.39   18.14   1 0.00000 0.00000 0.00000 0.00000 0.00000 0.00000
   5  -3   1  758.59   20.41  -2 0.00000 0.00000 0.00000 0.00000 0.00000 0.00000
   2   3  -8  758.59   20.41   1 0.00000 0.00000 0.00000 0.00000 0.00000 0.00000
   4   3   4  308.42    9.07  -2 0.00000 0.00000 0.00000 0.00000 0.00000 0.00000
   0  -3  -8  308.42    9.07   1 0.00000 0.00000 0.00000 0.00000 0.00000 0.00000
  -4  -3  -4  334.50   13.61  -2 0.00000 0.00000 0.00000 0.00000 0.00000 0.00000
   0   3   8  334.50   13.61   1 0.00000 0.00000 0.00000 0.00000 0.00000 0.00000
   3   3   7  378.73   12.47  -2 0.00000 0.00000 0.00000 0.00000 0.00000 0.00000
  -2  -3  -8  378.73   12.47   1 0.00000 0.00000 0.00000 0.00000 0.00000 0.00000
  -3  -3  -7  422.95   15.87  -2 0.00000 0.00000 0.00000 0.00000 0.00000 0.00000
   2   3   8  422.95   15.87   1 0.00000 0.00000 0.00000 0.00000 0.00000 0.00000
   2   3  10 1376.57   28.35  -2 0.00000 0.00000 0.00000 0.00000 0.00000 0.00000
  -4  -3  -8 1376.57   28.35   1 0.00000 0.00000 0.00000 0.00000 0.00000 0.00000
  -2  -3 -10 1474.09   45.36  -2 0.00000 0.00000 0.00000 0.00000 0.00000 0.00000
   4   3   8 1474.09   45.36   1 0.00000 0.00000 0.00000 0.00000 0.00000 0.00000
   1   3  13  314.09   14.74  -2 0.00000 0.00000 0.00000 0.00000 0.00000 0.00000
  -6  -3  -8  314.09   14.74   1 0.00000 0.00000 0.00000 0.00000 0.00000 0.00000
  -1  -3 -13  344.71   19.28  -2 0.00000 0.00000 0.00000 0.00000 0.00000 0.00000
   6   3   8  344.71   19.28   1 0.00000 0.00000 0.00000 0.00000 0.00000 0.00000
  -7   4   5  100.92   11.34  -2 0.00000 0.00000 0.00000 0.00000 0.00000 0.00000
  -6  -4   8  100.92   11.34   1 0.00000 0.00000 0.00000 0.00000 0.00000 0.00000
   7  -4  -5   87.31   26.08  -2 0.00000 0.00000 0.00000 0.00000 0.00000 0.00000
   6   4  -8   87.31   26.08   1 0.00000 0.00000 0.00000 0.00000 0.00000 0.00000
  -6   4   2  412.74   21.54  -2 0.00000 0.00000 0.00000 0.00000 0.00000 0.00000
  -4  -4   8  412.74   21.54   1 0.00000 0.00000 0.00000 0.00000 0.00000 0.00000
   6  -4  -2  294.82   27.21  -2 0.00000 0.00000 0.00000 0.00000 0.00000 0.00000
   4   4  -8  294.82   27.21   1 0.00000 0.00000 0.00000 0.00000 0.00000 0.00000
  -5   4  -1   -3.40    9.07  -2 0.00000 0.00000 0.00000 0.00000 0.00000 0.00000
  -2  -4   8   -3.40    9.07   1 0.00000 0.00000 0.00000 0.00000 0.00000 0.00000
   5  -4   1  -11.34   13.61  -2 0.00000 0.00000 0.00000 0.00000 0.00000 0.00000
   2   4  -8  -11.34   13.61   1 0.00000 0.00000 0.00000 0.00000 0.00000 0.00000
   4   4   4 1165.66   22.68  -2 0.00000 0.00000 0.00000 0.00000 0.00000 0.00000
   0  -4  -8 1165.66   22.68   1 0.00000 0.00000 0.00000 0.00000 0.00000 0.00000
  -4  -4  -4 1238.23   31.75  -2 0.00000 0.00000 0.00000 0.00000 0.00000 0.00000
   0   4   8 1238.23   31.75   1 0.00000 0.00000 0.00000 0.00000 0.00000 0.00000
   3   4   7 1373.17   31.75  -2 0.00000 0.00000 0.00000 0.00000 0.00000 0.00000
  -2  -4  -8 1373.17   31.75   1 0.00000 0.00000 0.00000 0.00000 0.00000 0.00000
  -3  -4  -7 1449.14   44.22  -2 0.00000 0.00000 0.00000 0.00000 0.00000 0.00000
   2   4   8 1449.14   44.22   1 0.00000 0.00000 0.00000 0.00000 0.00000 0.00000
   2   4  10  174.62   10.21  -2 0.00000 0.00000 0.00000 0.00000 0.00000 0.00000
  -4  -4  -8  174.62   10.21   1 0.00000 0.00000 0.00000 0.00000 0.00000 0.00000
  -2  -4 -10  148.54   12.47  -2 0.00000 0.00000 0.00000 0.00000 0.00000 0.00000
   4   4   8  148.54   12.47   1 0.00000 0.00000 0.00000 0.00000 0.00000 0.00000
   1   4  13  291.42   17.01  -2 0.00000 0.00000 0.00000 0.00000 0.00000 0.00000
  -6  -4  -8  291.42   17.01   1 0.00000 0.00000 0.00000 0.00000 0.00000 0.00000
  -1  -4 -13  255.13   18.14  -2 0.00000 0.00000 0.00000 0.00000 0.00000 0.00000
   6   4   8  255.13   18.14   1 0.00000 0.00000 0.00000 0.00000 0.00000 0.00000
  -7   5   5   18.14   13.61  -2 0.00000 0.00000 0.00000 0.00000 0.00000 0.00000
  -6  -5   8   18.14   13.61   1 0.00000 0.00000 0.00000 0.00000 0.00000 0.00000
   7  -5  -5  -15.87   41.95  -2 0.00000 0.00000 0.00000 0.00000 0.00000 0.00000
   6   5  -8  -15.87   41.95   1 0.00000 0.00000 0.00000 0.00000 0.00000 0.00000
  -6   5   2  139.47   15.87  -2 0.00000 0.00000 0.00000 0.00000 0.00000 0.00000
  -4  -5   8  139.47   15.87   1 0.00000 0.00000 0.00000 0.00000 0.00000 0.00000
   6  -5  -2  119.06   20.41  -2 0.00000 0.00000 0.00000 0.00000 0.00000 0.00000
   4   5  -8  119.06   20.41   1 0.00000 0.00000 0.00000 0.00000 0.00000 0.00000
  -5   5  -1  707.56   13.61  -2 0.00000 0.00000 0.00000 0.00000 0.00000 0.00000
  -2  -5   8  707.56   13.61   1 0.00000 0.00000 0.00000 0.00000 0.00000 0.00000
   5  -5   1  774.46   27.21  -2 0.00000 0.00000 0.00000 0.00000 0.00000 0.00000
   2   5  -8  774.46   27.21   1 0.00000 0.00000 0.00000 0.00000 0.00000 0.00000
   4   5   4  513.66   14.74  -2 0.00000 0.00000 0.00000 0.00000 0.00000 0.00000
   0  -5  -8  513.66   14.74   1 0.00000 0.00000 0.00000 0.00000 0.00000 0.00000
  -4  -5  -4  538.61   23.81  -2 0.00000 0.00000 0.00000 0.00000 0.00000 0.00000
   0   5   8  538.61   23.81   1 0.00000 0.00000 0.00000 0.00000 0.00000 0.00000
   3   5   7  130.40    7.94  -2 0.00000 0.00000 0.00000 0.00000 0.00000 0.00000
  -2  -5  -8  130.40    7.94   1 0.00000 0.00000 0.00000 0.00000 0.00000 0.00000
  -3  -5  -7  130.40   17.01  -2 0.00000 0.00000 0.00000 0.00000 0.00000 0.00000
   2   5   8  130.40   17.01   1 0.00000 0.00000 0.00000 0.00000 0.00000 0.00000
   2   5  10 1111.24   29.48  -2 0.00000 0.00000 0.00000 0.00000 0.00000 0.00000
  -4  -5  -8 1111.24   29.48   1 0.00000 0.00000 0.00000 0.00000 0.00000 0.00000
  -2  -5 -10 1099.90   49.89  -2 0.00000 0.00000 0.00000 0.00000 0.00000 0.00000
   4   5   8 1099.90   49.89   1 0.00000 0.00000 0.00000 0.00000 0.00000 0.00000
  -6   6   2  132.67   19.28  -2 0.00000 0.00000 0.00000 0.00000 0.00000 0.00000
  -4  -6   8  132.67   19.28   1 0.00000 0.00000 0.00000 0.00000 0.00000 0.00000
   6  -6  -2  134.94   38.55  -2 0.00000 0.00000 0.00000 0.00000 0.00000 0.00000
   4   6  -8  134.94   38.55   1 0.00000 0.00000 0.00000 0.00000 0.00000 0.00000
  -5   6  -1    6.80    9.07  -2 0.00000 0.00000 0.00000 0.00000 0.00000 0.00000
  -2  -6   8    6.80    9.07   1 0.00000 0.00000 0.00000 0.00000 0.00000 0.00000
   5  -6   1   27.21   24.95  -2 0.00000 0.00000 0.00000 0.00000 0.00000 0.00000
   2   6  -8   27.21   24.95   1 0.00000 0.00000 0.00000 0.00000 0.00000 0.00000
   4   6   4  574.89   18.14  -2 0.00000 0.00000 0.00000 0.00000 0.00000 0.00000
   0  -6  -8  574.89   18.14   1 0.00000 0.00000 0.00000 0.00000 0.00000 0.00000
   3   6   7  577.16   20.41  -2 0.00000 0.00000 0.00000 0.00000 0.00000 0.00000
  -2  -6  -8  577.16   20.41   1 0.00000 0.00000 0.00000 0.00000 0.00000 0.00000
  -3  -6  -7  538.61   31.75  -2 0.00000 0.00000 0.00000 0.00000 0.00000 0.00000
   2   6   8  538.61   31.75   1 0.00000 0.00000 0.00000 0.00000 0.00000 0.00000
   2   6  10   36.29   10.21  -2 0.00000 0.00000 0.00000 0.00000 0.00000 0.00000
  -4  -6  -8   36.29   10.21   1 0.00000 0.00000 0.00000 0.00000 0.00000 0.00000
  -2  -6 -10   28.35   22.68  -2 0.00000 0.00000 0.00000 0.00000 0.00000 0.00000
   4   6   8   28.35   22.68   1 0.00000 0.00000 0.00000 0.00000 0.00000 0.00000
   8   0  -6   15.87    9.07  -2 0.00000 0.00000 0.00000 0.00000 0.00000 0.00000
   7   0  -9   15.87    9.07   1 0.00000 0.00000 0.00000 0.00000 0.00000 0.00000
   7   0  -3  577.16   20.41  -2 0.00000 0.00000 0.00000 0.00000 0.00000 0.00000
   5   0  -9  577.16   20.41   1 0.00000 0.00000 0.00000 0.00000 0.00000 0.00000
   6   0   0 2809.84   52.16  -2 0.00000 0.00000 0.00000 0.00000 0.00000 0.00000
   3   0  -9 2809.84   52.16   1 0.00000 0.00000 0.00000 0.00000 0.00000 0.00000
   5   0   3  542.01   14.74  -2 0.00000 0.00000 0.00000 0.00000 0.00000 0.00000
   1   0  -9  542.01   14.74   1 0.00000 0.00000 0.00000 0.00000 0.00000 0.00000
  -4   0  -6 1280.19   29.48  -2 0.00000 0.00000 0.00000 0.00000 0.00000 0.00000
   1   0   9 1280.19   29.48   1 0.00000 0.00000 0.00000 0.00000 0.00000 0.00000
  -3   0  -9 3384.73   58.96  -2 0.00000 0.00000 0.00000 0.00000 0.00000 0.00000
   3   0   9 3384.73   58.96   1 0.00000 0.00000 0.00000 0.00000 0.00000 0.00000
  -2   0 -12 1006.92   24.95  -2 0.00000 0.00000 0.00000 0.00000 0.00000 0.00000
   5   0   9 1006.92   24.95   1 0.00000 0.00000 0.00000 0.00000 0.00000 0.00000
  -1   0 -15   96.38   10.21  -2 0.00000 0.00000 0.00000 0.00000 0.00000 0.00000
   7   0   9   96.38   10.21   1 0.00000 0.00000 0.00000 0.00000 0.00000 0.00000
  -8   1   6  417.28   17.01  -2 0.00000 0.00000 0.00000 0.00000 0.00000 0.00000
  -7  -1   9  417.28   17.01   1 0.00000 0.00000 0.00000 0.00000 0.00000 0.00000
   8  -1  -6  459.24   14.74  -2 0.00000 0.00000 0.00000 0.00000 0.00000 0.00000
   7   1  -9  459.24   14.74   1 0.00000 0.00000 0.00000 0.00000 0.00000 0.00000
  -7   1   3  129.27   11.34  -2 0.00000 0.00000 0.00000 0.00000 0.00000 0.00000
  -5  -1   9  129.27   11.34   1 0.00000 0.00000 0.00000 0.00000 0.00000 0.00000
   7  -1  -3  140.61   10.21  -2 0.00000 0.00000 0.00000 0.00000 0.00000 0.00000
   5   1  -9  140.61   10.21   1 0.00000 0.00000 0.00000 0.00000 0.00000 0.00000
  -6   1   0  221.11    9.07  -2 0.00000 0.00000 0.00000 0.00000 0.00000 0.00000
  -3  -1   9  221.11    9.07   1 0.00000 0.00000 0.00000 0.00000 0.00000 0.00000
   6  -1   0  226.78    9.07  -2 0.00000 0.00000 0.00000 0.00000 0.00000 0.00000
   3   1  -9  226.78    9.07   1 0.00000 0.00000 0.00000 0.00000 0.00000 0.00000
  -5   1  -3 2192.99   55.56  -2 0.00000 0.00000 0.00000 0.00000 0.00000 0.00000
  -1  -1   9 2192.99   55.56   1 0.00000 0.00000 0.00000 0.00000 0.00000 0.00000
   5  -1   3 2054.65   45.36  -2 0.00000 0.00000 0.00000 0.00000 0.00000 0.00000
   1   1  -9 2054.65   45.36   1 0.00000 0.00000 0.00000 0.00000 0.00000 0.00000
   4   1   6 2157.84   40.82  -2 0.00000 0.00000 0.00000 0.00000 0.00000 0.00000
  -1  -1  -9 2157.84   40.82   1 0.00000 0.00000 0.00000 0.00000 0.00000 0.00000
  -4  -1  -6 2145.37   54.43  -2 0.00000 0.00000 0.00000 0.00000 0.00000 0.00000
   1   1   9 2145.37   54.43   1 0.00000 0.00000 0.00000 0.00000 0.00000 0.00000
   3   1   9    4.54    5.67  -2 0.00000 0.00000 0.00000 0.00000 0.00000 0.00000
  -3  -1  -9    4.54    5.67   1 0.00000 0.00000 0.00000 0.00000 0.00000 0.00000
  -3  -1  -9   -1.13    9.07  -2 0.00000 0.00000 0.00000 0.00000 0.00000 0.00000
   3   1   9   -1.13    9.07   1 0.00000 0.00000 0.00000 0.00000 0.00000 0.00000
   2   1  12  827.76   21.54  -2 0.00000 0.00000 0.00000 0.00000 0.00000 0.00000
  -5  -1  -9  827.76   21.54   1 0.00000 0.00000 0.00000 0.00000 0.00000 0.00000
  -2  -1 -12  807.35   28.35  -2 0.00000 0.00000 0.00000 0.00000 0.00000 0.00000
   5   1   9  807.35   28.35   1 0.00000 0.00000 0.00000 0.00000 0.00000 0.00000
   1   1  15  562.42   23.81  -2 0.00000 0.00000 0.00000 0.00000 0.00000 0.00000
  -7  -1  -9  562.42   23.81   1 0.00000 0.00000 0.00000 0.00000 0.00000 0.00000
  -1  -1 -15  594.17   29.48  -2 0.00000 0.00000 0.00000 0.00000 0.00000 0.00000
   7   1   9  594.17   29.48   1 0.00000 0.00000 0.00000 0.00000 0.00000 0.00000
   1   1  16   -4.54   17.01  -2 0.00000 0.00000 0.00000 0.00000 0.00000 0.00000
  -8  -1  -9   -4.54   17.01   1 0.00000 0.00000 0.00000 0.00000 0.00000 0.00000
  -1  -1 -16    7.94   17.01  -2 0.00000 0.00000 0.00000 0.00000 0.00000 0.00000
   8   1   9    7.94   17.01   1 0.00000 0.00000 0.00000 0.00000 0.00000 0.00000
   8  -2  -6   24.95   12.47  -2 0.00000 0.00000 0.00000 0.00000 0.00000 0.00000
   7   2  -9   24.95   12.47   1 0.00000 0.00000 0.00000 0.00000 0.00000 0.00000
  -8   2   6   23.81   10.21  -2 0.00000 0.00000 0.00000 0.00000 0.00000 0.00000
  -7  -2   9   23.81   10.21   1 0.00000 0.00000 0.00000 0.00000 0.00000 0.00000
  -7   2   3  377.59   18.14  -2 0.00000 0.00000 0.00000 0.00000 0.00000 0.00000
  -5  -2   9  377.59   18.14   1 0.00000 0.00000 0.00000 0.00000 0.00000 0.00000
   7  -2  -3  371.92   15.87  -2 0.00000 0.00000 0.00000 0.00000 0.00000 0.00000
   5   2  -9  371.92   15.87   1 0.00000 0.00000 0.00000 0.00000 0.00000 0.00000
  -6   2   0  811.88   20.41  -2 0.00000 0.00000 0.00000 0.00000 0.00000 0.00000
  -3  -2   9  811.88   20.41   1 0.00000 0.00000 0.00000 0.00000 0.00000 0.00000
   6  -2   0  839.10   24.95  -2 0.00000 0.00000 0.00000 0.00000 0.00000 0.00000
   3   2  -9  839.10   24.95   1 0.00000 0.00000 0.00000 0.00000 0.00000 0.00000
  -5   2  -3   12.47    6.80  -2 0.00000 0.00000 0.00000 0.00000 0.00000 0.00000
  -1  -2   9   12.47    6.80   1 0.00000 0.00000 0.00000 0.00000 0.00000 0.00000
   5  -2   3   27.21    9.07  -2 0.00000 0.00000 0.00000 0.00000 0.00000 0.00000
   1   2  -9   27.21    9.07   1 0.00000 0.00000 0.00000 0.00000 0.00000 0.00000
   4   2   6  526.14   14.74  -2 0.00000 0.00000 0.00000 0.00000 0.00000 0.00000
  -1  -2  -9  526.14   14.74   1 0.00000 0.00000 0.00000 0.00000 0.00000 0.00000
  -4  -2  -6  523.87   18.14  -2 0.00000 0.00000 0.00000 0.00000 0.00000 0.00000
   1   2   9  523.87   18.14   1 0.00000 0.00000 0.00000 0.00000 0.00000 0.00000
   3   2   9 1036.40   20.41  -2 0.00000 0.00000 0.00000 0.00000 0.00000 0.00000
  -3  -2  -9 1036.40   20.41   1 0.00000 0.00000 0.00000 0.00000 0.00000 0.00000
  -3  -2  -9 1128.24   32.88  -2 0.00000 0.00000 0.00000 0.00000 0.00000 0.00000
   3   2   9 1128.24   32.88   1 0.00000 0.00000 0.00000 0.00000 0.00000 0.00000
   2   2  12  483.05   15.87  -2 0.00000 0.00000 0.00000 0.00000 0.00000 0.00000
  -5  -2  -9  483.05   15.87   1 0.00000 0.00000 0.00000 0.00000 0.00000 0.00000
  -2  -2 -12  537.48   23.81  -2 0.00000 0.00000 0.00000 0.00000 0.00000 0.00000
   5   2   9  537.48   23.81   1 0.00000 0.00000 0.00000 0.00000 0.00000 0.00000
   1   2  15    2.27   12.47  -2 0.00000 0.00000 0.00000 0.00000 0.00000 0.00000
  -7  -2  -9    2.27   12.47   1 0.00000 0.00000 0.00000 0.00000 0.00000 0.00000
  -1  -2 -15   10.21   13.61  -2 0.00000 0.00000 0.00000 0.00000 0.00000 0.00000
   7   2   9   10.21   13.61   1 0.00000 0.00000 0.00000 0.00000 0.00000 0.00000
  -8   3   6   54.43   13.61  -2 0.00000 0.00000 0.00000 0.00000 0.00000 0.00000
  -7  -3   9   54.43   13.61   1 0.00000 0.00000 0.00000 0.00000 0.00000 0.00000
   8  -3  -6   35.15   36.29  -2 0.00000 0.00000 0.00000 0.00000 0.00000 0.00000
   7   3  -9   35.15   36.29   1 0.00000 0.00000 0.00000 0.00000 0.00000 0.00000
  -7   3   3  102.05   11.34  -2 0.00000 0.00000 0.00000 0.00000 0.00000 0.00000
  -5  -3   9  102.05   11.34   1 0.00000 0.00000 0.00000 0.00000 0.00000 0.00000
   7  -3  -3   77.11   22.68  -2 0.00000 0.00000 0.00000 0.00000 0.00000 0.00000
   5   3  -9   77.11   22.68   1 0.00000 0.00000 0.00000 0.00000 0.00000 0.00000
  -6   3   0  311.83   13.61  -2 0.00000 0.00000 0.00000 0.00000 0.00000 0.00000
  -3  -3   9  311.83   13.61   1 0.00000 0.00000 0.00000 0.00000 0.00000 0.00000
   6  -3   0  288.01   13.61  -2 0.00000 0.00000 0.00000 0.00000 0.00000 0.00000
   3   3  -9  288.01   13.61   1 0.00000 0.00000 0.00000 0.00000 0.00000 0.00000
  -5   3  -3  225.65    9.07  -2 0.00000 0.00000 0.00000 0.00000 0.00000 0.00000
  -1  -3   9  225.65    9.07   1 0.00000 0.00000 0.00000 0.00000 0.00000 0.00000
   5  -3   3  234.72   11.34  -2 0.00000 0.00000 0.00000 0.00000 0.00000 0.00000
   1   3  -9  234.72   11.34   1 0.00000 0.00000 0.00000 0.00000 0.00000 0.00000
   4   3   6  147.41    9.07  -2 0.00000 0.00000 0.00000 0.00000 0.00000 0.00000
  -1  -3  -9  147.41    9.07   1 0.00000 0.00000 0.00000 0.00000 0.00000 0.00000
  -4  -3  -6  161.02    9.07  -2 0.00000 0.00000 0.00000 0.00000 0.00000 0.00000
   1   3   9  161.02    9.07   1 0.00000 0.00000 0.00000 0.00000 0.00000 0.00000
   3   3   9    2.27    6.80  -2 0.00000 0.00000 0.00000 0.00000 0.00000 0.00000
  -3  -3  -9    2.27    6.80   1 0.00000 0.00000 0.00000 0.00000 0.00000 0.00000
  -3  -3  -9    4.54   12.47  -2 0.00000 0.00000 0.00000 0.00000 0.00000 0.00000
   3   3   9    4.54   12.47   1 0.00000 0.00000 0.00000 0.00000 0.00000 0.00000
   2   3  12   34.02    9.07  -2 0.00000 0.00000 0.00000 0.00000 0.00000 0.00000
  -5  -3  -9   34.02    9.07   1 0.00000 0.00000 0.00000 0.00000 0.00000 0.00000
  -2  -3 -12   48.76   12.47  -2 0.00000 0.00000 0.00000 0.00000 0.00000 0.00000
   5   3   9   48.76   12.47   1 0.00000 0.00000 0.00000 0.00000 0.00000 0.00000
   1   3  15   71.44   14.74  -2 0.00000 0.00000 0.00000 0.00000 0.00000 0.00000
  -7  -3  -9   71.44   14.74   1 0.00000 0.00000 0.00000 0.00000 0.00000 0.00000
  -1  -3 -15   62.37   18.14  -2 0.00000 0.00000 0.00000 0.00000 0.00000 0.00000
   7   3   9   62.37   18.14   1 0.00000 0.00000 0.00000 0.00000 0.00000 0.00000
  -8   4   6  236.99   22.68  -2 0.00000 0.00000 0.00000 0.00000 0.00000 0.00000
  -7  -4   9  236.99   22.68   1 0.00000 0.00000 0.00000 0.00000 0.00000 0.00000
  -7   4   3  142.87   14.74  -2 0.00000 0.00000 0.00000 0.00000 0.00000 0.00000
  -5  -4   9  142.87   14.74   1 0.00000 0.00000 0.00000 0.00000 0.00000 0.00000
   7  -4  -3  116.79   22.68  -2 0.00000 0.00000 0.00000 0.00000 0.00000 0.00000
   5   4  -9  116.79   22.68   1 0.00000 0.00000 0.00000 0.00000 0.00000 0.00000
  -6   4   0   -3.40   11.34  -2 0.00000 0.00000 0.00000 0.00000 0.00000 0.00000
  -3  -4   9   -3.40   11.34   1 0.00000 0.00000 0.00000 0.00000 0.00000 0.00000
   6  -4   0    5.67   10.21  -2 0.00000 0.00000 0.00000 0.00000 0.00000 0.00000
   3   4  -9    5.67   10.21   1 0.00000 0.00000 0.00000 0.00000 0.00000 0.00000
  -5   4  -3  182.56    7.94  -2 0.00000 0.00000 0.00000 0.00000 0.00000 0.00000
  -1  -4   9  182.56    7.94   1 0.00000 0.00000 0.00000 0.00000 0.00000 0.00000
   5  -4   3  166.69   11.34  -2 0.00000 0.00000 0.00000 0.00000 0.00000 0.00000
   1   4  -9  166.69   11.34   1 0.00000 0.00000 0.00000 0.00000 0.00000 0.00000
   4   4   6   39.69    6.80  -2 0.00000 0.00000 0.00000 0.00000 0.00000 0.00000
  -1  -4  -9   39.69    6.80   1 0.00000 0.00000 0.00000 0.00000 0.00000 0.00000
  -4  -4  -6   44.22    6.80  -2 0.00000 0.00000 0.00000 0.00000 0.00000 0.00000
   1   4   9   44.22    6.80   1 0.00000 0.00000 0.00000 0.00000 0.00000 0.00000
   3   4   9    2.27    6.80  -2 0.00000 0.00000 0.00000 0.00000 0.00000 0.00000
  -3  -4  -9    2.27    6.80   1 0.00000 0.00000 0.00000 0.00000 0.00000 0.00000
  -3  -4  -9    9.07    9.07  -2 0.00000 0.00000 0.00000 0.00000 0.00000 0.00000
   3   4   9    9.07    9.07   1 0.00000 0.00000 0.00000 0.00000 0.00000 0.00000
   2   4  12   83.91   10.21  -2 0.00000 0.00000 0.00000 0.00000 0.00000 0.00000
  -5  -4  -9   83.91   10.21   1 0.00000 0.00000 0.00000 0.00000 0.00000 0.00000
  -2  -4 -12  104.32   15.87  -2 0.00000 0.00000 0.00000 0.00000 0.00000 0.00000
   5   4   9  104.32   15.87   1 0.00000 0.00000 0.00000 0.00000 0.00000 0.00000
  -7   5   3  184.83   17.01  -2 0.00000 0.00000 0.00000 0.00000 0.00000 0.00000
  -5  -5   9  184.83   17.01   1 0.00000 0.00000 0.00000 0.00000 0.00000 0.00000
   7  -5  -3  106.59   24.95  -2 0.00000 0.00000 0.00000 0.00000 0.00000 0.00000
   5   5  -9  106.59   24.95   1 0.00000 0.00000 0.00000 0.00000 0.00000 0.00000
  -6   5   0  206.37   11.34  -2 0.00000 0.00000 0.00000 0.00000 0.00000 0.00000
  -3  -5   9  206.37   11.34   1 0.00000 0.00000 0.00000 0.00000 0.00000 0.00000
   6  -5   0  196.17   21.54  -2 0.00000 0.00000 0.00000 0.00000 0.00000 0.00000
   3   5  -9  196.17   21.54   1 0.00000 0.00000 0.00000 0.00000 0.00000 0.00000
  -5   5  -3   18.14    5.67  -2 0.00000 0.00000 0.00000 0.00000 0.00000 0.00000
  -1  -5   9   18.14    5.67   1 0.00000 0.00000 0.00000 0.00000 0.00000 0.00000
   5  -5   3   18.14    9.07  -2 0.00000 0.00000 0.00000 0.00000 0.00000 0.00000
   1   5  -9   18.14    9.07   1 0.00000 0.00000 0.00000 0.00000 0.00000 0.00000
   4   5   6    1.13    6.80  -2 0.00000 0.00000 0.00000 0.00000 0.00000 0.00000
  -1  -5  -9    1.13    6.80   1 0.00000 0.00000 0.00000 0.00000 0.00000 0.00000
  -4  -5  -6    4.54   14.74  -2 0.00000 0.00000 0.00000 0.00000 0.00000 0.00000
   1   5   9    4.54   14.74   1 0.00000 0.00000 0.00000 0.00000 0.00000 0.00000
   3   5   9    2.27    7.94  -2 0.00000 0.00000 0.00000 0.00000 0.00000 0.00000
  -3  -5  -9    2.27    7.94   1 0.00000 0.00000 0.00000 0.00000 0.00000 0.00000
  -3  -5  -9    4.54   17.01  -2 0.00000 0.00000 0.00000 0.00000 0.00000 0.00000
   3   5   9    4.54   17.01   1 0.00000 0.00000 0.00000 0.00000 0.00000 0.00000
   2   5  12   19.28   11.34  -2 0.00000 0.00000 0.00000 0.00000 0.00000 0.00000
  -5  -5  -9   19.28   11.34   1 0.00000 0.00000 0.00000 0.00000 0.00000 0.00000
  -2  -5 -12   -4.54   24.95  -2 0.00000 0.00000 0.00000 0.00000 0.00000 0.00000
   5   5   9   -4.54   24.95   1 0.00000 0.00000 0.00000 0.00000 0.00000 0.00000
  -6   6   0   -1.13   15.87  -2 0.00000 0.00000 0.00000 0.00000 0.00000 0.00000
  -3  -6   9   -1.13   15.87   1 0.00000 0.00000 0.00000 0.00000 0.00000 0.00000
   6  -6   0   -1.13   30.62  -2 0.00000 0.00000 0.00000 0.00000 0.00000 0.00000
   3   6  -9   -1.13   30.62   1 0.00000 0.00000 0.00000 0.00000 0.00000 0.00000
  -5   6  -3   64.63    7.94  -2 0.00000 0.00000 0.00000 0.00000 0.00000 0.00000
  -1  -6   9   64.63    7.94   1 0.00000 0.00000 0.00000 0.00000 0.00000 0.00000
   4   6   6   32.88    9.07  -2 0.00000 0.00000 0.00000 0.00000 0.00000 0.00000
  -1  -6  -9   32.88    9.07   1 0.00000 0.00000 0.00000 0.00000 0.00000 0.00000
  -4  -6  -6   72.57   30.62  -2 0.00000 0.00000 0.00000 0.00000 0.00000 0.00000
   1   6   9   72.57   30.62   1 0.00000 0.00000 0.00000 0.00000 0.00000 0.00000
   3   6   9   18.14   10.21  -2 0.00000 0.00000 0.00000 0.00000 0.00000 0.00000
  -3  -6  -9   18.14   10.21   1 0.00000 0.00000 0.00000 0.00000 0.00000 0.00000
  -3  -6  -9   -2.27   23.81  -2 0.00000 0.00000 0.00000 0.00000 0.00000 0.00000
   3   6   9   -2.27   23.81   1 0.00000 0.00000 0.00000 0.00000 0.00000 0.00000
   9   0  -7   21.54   11.34  -2 0.00000 0.00000 0.00000 0.00000 0.00000 0.00000
   8   0 -10   21.54   11.34   1 0.00000 0.00000 0.00000 0.00000 0.00000 0.00000
   8   0  -4   37.42   11.34  -2 0.00000 0.00000 0.00000 0.00000 0.00000 0.00000
   6   0 -10   37.42   11.34   1 0.00000 0.00000 0.00000 0.00000 0.00000 0.00000
   7   0  -1    7.94    7.94  -2 0.00000 0.00000 0.00000 0.00000 0.00000 0.00000
   4   0 -10    7.94    7.94   1 0.00000 0.00000 0.00000 0.00000 0.00000 0.00000
   6   0   2   14.74    6.80  -2 0.00000 0.00000 0.00000 0.00000 0.00000 0.00000
   2   0 -10   14.74    6.80   1 0.00000 0.00000 0.00000 0.00000 0.00000 0.00000
  -5   0  -5  206.37   10.21  -2 0.00000 0.00000 0.00000 0.00000 0.00000 0.00000
   0   0  10  206.37   10.21   1 0.00000 0.00000 0.00000 0.00000 0.00000 0.00000
  -4   0  -8  591.90   17.01  -2 0.00000 0.00000 0.00000 0.00000 0.00000 0.00000
   2   0  10  591.90   17.01   1 0.00000 0.00000 0.00000 0.00000 0.00000 0.00000
  -3   0 -11   11.34    7.94  -2 0.00000 0.00000 0.00000 0.00000 0.00000 0.00000
   4   0  10   11.34    7.94   1 0.00000 0.00000 0.00000 0.00000 0.00000 0.00000
  -2   0 -14  469.44   17.01  -2 0.00000 0.00000 0.00000 0.00000 0.00000 0.00000
   6   0  10  469.44   17.01   1 0.00000 0.00000 0.00000 0.00000 0.00000 0.00000
  -9   1   7   36.29   12.47  -2 0.00000 0.00000 0.00000 0.00000 0.00000 0.00000
  -8  -1  10   36.29   12.47   1 0.00000 0.00000 0.00000 0.00000 0.00000 0.00000
   9  -1  -7   57.83   26.08  -2 0.00000 0.00000 0.00000 0.00000 0.00000 0.00000
   8   1 -10   57.83   26.08   1 0.00000 0.00000 0.00000 0.00000 0.00000 0.00000
  -8   1   4   74.84   12.47  -2 0.00000 0.00000 0.00000 0.00000 0.00000 0.00000
  -6  -1  10   74.84   12.47   1 0.00000 0.00000 0.00000 0.00000 0.00000 0.00000
   8  -1  -4   44.22    9.07  -2 0.00000 0.00000 0.00000 0.00000 0.00000 0.00000
   6   1 -10   44.22    9.07   1 0.00000 0.00000 0.00000 0.00000 0.00000 0.00000
  -7   1   1   48.76    9.07  -2 0.00000 0.00000 0.00000 0.00000 0.00000 0.00000
  -4  -1  10   48.76    9.07   1 0.00000 0.00000 0.00000 0.00000 0.00000 0.00000
   7  -1  -1   40.82    6.80  -2 0.00000 0.00000 0.00000 0.00000 0.00000 0.00000
   4   1 -10   40.82    6.80   1 0.00000 0.00000 0.00000 0.00000 0.00000 0.00000
  -6   1  -2   90.71    7.94  -2 0.00000 0.00000 0.00000 0.00000 0.00000 0.00000
  -2  -1  10   90.71    7.94   1 0.00000 0.00000 0.00000 0.00000 0.00000 0.00000
   6  -1   2   96.38    7.94  -2 0.00000 0.00000 0.00000 0.00000 0.00000 0.00000
   2   1 -10   96.38    7.94   1 0.00000 0.00000 0.00000 0.00000 0.00000 0.00000
   5   1   5   21.54    6.80  -2 0.00000 0.00000 0.00000 0.00000 0.00000 0.00000
   0  -1 -10   21.54    6.80   1 0.00000 0.00000 0.00000 0.00000 0.00000 0.00000
  -5  -1  -5   29.48    9.07  -2 0.00000 0.00000 0.00000 0.00000 0.00000 0.00000
   0   1  10   29.48    9.07   1 0.00000 0.00000 0.00000 0.00000 0.00000 0.00000
   4   1   8  517.06   13.61  -2 0.00000 0.00000 0.00000 0.00000 0.00000 0.00000
  -2  -1 -10  517.06   13.61   1 0.00000 0.00000 0.00000 0.00000 0.00000 0.00000
  -4  -1  -8  514.80   15.87  -2 0.00000 0.00000 0.00000 0.00000 0.00000 0.00000
   2   1  10  514.80   15.87   1 0.00000 0.00000 0.00000 0.00000 0.00000 0.00000
   3   1  11  449.03   14.74  -2 0.00000 0.00000 0.00000 0.00000 0.00000 0.00000
  -4  -1 -10  449.03   14.74   1 0.00000 0.00000 0.00000 0.00000 0.00000 0.00000
  -3  -1 -11  460.37   20.41  -2 0.00000 0.00000 0.00000 0.00000 0.00000 0.00000
   4   1  10  460.37   20.41   1 0.00000 0.00000 0.00000 0.00000 0.00000 0.00000
   2   1  14  116.79   11.34  -2 0.00000 0.00000 0.00000 0.00000 0.00000 0.00000
  -6  -1 -10  116.79   11.34   1 0.00000 0.00000 0.00000 0.00000 0.00000 0.00000
  -2  -1 -14  112.26   13.61  -2 0.00000 0.00000 0.00000 0.00000 0.00000 0.00000
   6   1  10  112.26   13.61   1 0.00000 0.00000 0.00000 0.00000 0.00000 0.00000
   2   1  15   60.10   14.74  -2 0.00000 0.00000 0.00000 0.00000 0.00000 0.00000
  -7  -1 -10   60.10   14.74   1 0.00000 0.00000 0.00000 0.00000 0.00000 0.00000
  -2  -1 -15   39.69   18.14  -2 0.00000 0.00000 0.00000 0.00000 0.00000 0.00000
   7   1  10   39.69   18.14   1 0.00000 0.00000 0.00000 0.00000 0.00000 0.00000
  -9   2   7   19.28   30.62  -2 0.00000 0.00000 0.00000 0.00000 0.00000 0.00000
  -8  -2  10   19.28   30.62   1 0.00000 0.00000 0.00000 0.00000 0.00000 0.00000
  -8   2   4   -6.80   10.21  -2 0.00000 0.00000 0.00000 0.00000 0.00000 0.00000
  -6  -2  10   -6.80   10.21   1 0.00000 0.00000 0.00000 0.00000 0.00000 0.00000
   8  -2  -4    2.27    6.80  -2 0.00000 0.00000 0.00000 0.00000 0.00000 0.00000
   6   2 -10    2.27    6.80   1 0.00000 0.00000 0.00000 0.00000 0.00000 0.00000
  -7   2   1  148.54   11.34  -2 0.00000 0.00000 0.00000 0.00000 0.00000 0.00000
  -4  -2  10  148.54   11.34   1 0.00000 0.00000 0.00000 0.00000 0.00000 0.00000
   7  -2  -1  134.94   11.34  -2 0.00000 0.00000 0.00000 0.00000 0.00000 0.00000
   4   2 -10  134.94   11.34   1 0.00000 0.00000 0.00000 0.00000 0.00000 0.00000
  -6   2  -2  514.80   15.87  -2 0.00000 0.00000 0.00000 0.00000 0.00000 0.00000
  -2  -2  10  514.80   15.87   1 0.00000 0.00000 0.00000 0.00000 0.00000 0.00000
   6  -2   2  507.99   23.81  -2 0.00000 0.00000 0.00000 0.00000 0.00000 0.00000
   2   2 -10  507.99   23.81   1 0.00000 0.00000 0.00000 0.00000 0.00000 0.00000
   5   2   5  375.33   13.61  -2 0.00000 0.00000 0.00000 0.00000 0.00000 0.00000
   0  -2 -10  375.33   13.61   1 0.00000 0.00000 0.00000 0.00000 0.00000 0.00000
  -5  -2  -5  381.00   18.14  -2 0.00000 0.00000 0.00000 0.00000 0.00000 0.00000
   0   2  10  381.00   18.14   1 0.00000 0.00000 0.00000 0.00000 0.00000 0.00000
   4   2   8   64.63    6.80  -2 0.00000 0.00000 0.00000 0.00000 0.00000 0.00000
  -2  -2 -10   64.63    6.80   1 0.00000 0.00000 0.00000 0.00000 0.00000 0.00000
  -4  -2  -8   40.82   12.47  -2 0.00000 0.00000 0.00000 0.00000 0.00000 0.00000
   2   2  10   40.82   12.47   1 0.00000 0.00000 0.00000 0.00000 0.00000 0.00000
   3   2  11  163.28    9.07  -2 0.00000 0.00000 0.00000 0.00000 0.00000 0.00000
  -4  -2 -10  163.28    9.07   1 0.00000 0.00000 0.00000 0.00000 0.00000 0.00000
  -3  -2 -11  184.83   13.61  -2 0.00000 0.00000 0.00000 0.00000 0.00000 0.00000
   4   2  10  184.83   13.61   1 0.00000 0.00000 0.00000 0.00000 0.00000 0.00000
   2   2  14  422.95   21.54  -2 0.00000 0.00000 0.00000 0.00000 0.00000 0.00000
  -6  -2 -10  422.95   21.54   1 0.00000 0.00000 0.00000 0.00000 0.00000 0.00000
  -2  -2 -14  429.75   24.95  -2 0.00000 0.00000 0.00000 0.00000 0.00000 0.00000
   6   2  10  429.75   24.95   1 0.00000 0.00000 0.00000 0.00000 0.00000 0.00000
   2   2  15   27.21   13.61  -2 0.00000 0.00000 0.00000 0.00000 0.00000 0.00000
  -7  -2 -10   27.21   13.61   1 0.00000 0.00000 0.00000 0.00000 0.00000 0.00000
  -2  -2 -15   13.61   19.28  -2 0.00000 0.00000 0.00000 0.00000 0.00000 0.00000
   7   2  10   13.61   19.28   1 0.00000 0.00000 0.00000 0.00000 0.00000 0.00000
  -8   3   4  453.57   21.54  -2 0.00000 0.00000 0.00000 0.00000 0.00000 0.00000
  -6  -3  10  453.57   21.54   1 0.00000 0.00000 0.00000 0.00000 0.00000 0.00000
   8  -3  -4  445.63   39.69  -2 0.00000 0.00000 0.00000 0.00000 0.00000 0.00000
   6   3 -10  445.63   39.69   1 0.00000 0.00000 0.00000 0.00000 0.00000 0.00000
  -7   3   1  570.36   20.41  -2 0.00000 0.00000 0.00000 0.00000 0.00000 0.00000
  -4  -3  10  570.36   20.41   1 0.00000 0.00000 0.00000 0.00000 0.00000 0.00000
   7  -3  -1  658.80   30.62  -2 0.00000 0.00000 0.00000 0.00000 0.00000 0.00000
   4   3 -10  658.80   30.62   1 0.00000 0.00000 0.00000 0.00000 0.00000 0.00000
  -6   3  -2    9.07    5.67  -2 0.00000 0.00000 0.00000 0.00000 0.00000 0.00000
  -2  -3  10    9.07    5.67   1 0.00000 0.00000 0.00000 0.00000 0.00000 0.00000
   6  -3   2   13.61    9.07  -2 0.00000 0.00000 0.00000 0.00000 0.00000 0.00000
   2   3 -10   13.61    9.07   1 0.00000 0.00000 0.00000 0.00000 0.00000 0.00000
   5   3   5 1019.39   23.81  -2 0.00000 0.00000 0.00000 0.00000 0.00000 0.00000
   0  -3 -10 1019.39   23.81   1 0.00000 0.00000 0.00000 0.00000 0.00000 0.00000
  -5  -3  -5 1033.00   28.35  -2 0.00000 0.00000 0.00000 0.00000 0.00000 0.00000
   0   3  10 1033.00   28.35   1 0.00000 0.00000 0.00000 0.00000 0.00000 0.00000
   4   3   8 1423.06   27.21  -2 0.00000 0.00000 0.00000 0.00000 0.00000 0.00000
  -2  -3 -10 1423.06   27.21   1 0.00000 0.00000 0.00000 0.00000 0.00000 0.00000
  -4  -3  -8 1492.23   41.95  -2 0.00000 0.00000 0.00000 0.00000 0.00000 0.00000
   2   3  10 1492.23   41.95   1 0.00000 0.00000 0.00000 0.00000 0.00000 0.00000
   3   3  11  108.86    9.07  -2 0.00000 0.00000 0.00000 0.00000 0.00000 0.00000
  -4  -3 -10  108.86    9.07   1 0.00000 0.00000 0.00000 0.00000 0.00000 0.00000
  -3  -3 -11  116.79   14.74  -2 0.00000 0.00000 0.00000 0.00000 0.00000 0.00000
   4   3  10  116.79   14.74   1 0.00000 0.00000 0.00000 0.00000 0.00000 0.00000
   2   3  14   39.69   13.61  -2 0.00000 0.00000 0.00000 0.00000 0.00000 0.00000
  -6  -3 -10   39.69   13.61   1 0.00000 0.00000 0.00000 0.00000 0.00000 0.00000
  -2  -3 -14   55.56   18.14  -2 0.00000 0.00000 0.00000 0.00000 0.00000 0.00000
   6   3  10   55.56   18.14   1 0.00000 0.00000 0.00000 0.00000 0.00000 0.00000
  -8   4   4   87.31   19.28  -2 0.00000 0.00000 0.00000 0.00000 0.00000 0.00000
  -6  -4  10   87.31   19.28   1 0.00000 0.00000 0.00000 0.00000 0.00000 0.00000
   8  -4  -4   57.83   38.55  -2 0.00000 0.00000 0.00000 0.00000 0.00000 0.00000
   6   4 -10   57.83   38.55   1 0.00000 0.00000 0.00000 0.00000 0.00000 0.00000
  -7   4   1  432.02   17.01  -2 0.00000 0.00000 0.00000 0.00000 0.00000 0.00000
  -4  -4  10  432.02   17.01   1 0.00000 0.00000 0.00000 0.00000 0.00000 0.00000
   7  -4  -1  421.82   20.41  -2 0.00000 0.00000 0.00000 0.00000 0.00000 0.00000
   4   4 -10  421.82   20.41   1 0.00000 0.00000 0.00000 0.00000 0.00000 0.00000
  -6   4  -2 1887.97   37.42  -2 0.00000 0.00000 0.00000 0.00000 0.00000 0.00000
  -2  -4  10 1887.97   37.42   1 0.00000 0.00000 0.00000 0.00000 0.00000 0.00000
   6  -4   2 1868.69   48.76  -2 0.00000 0.00000 0.00000 0.00000 0.00000 0.00000
   2   4 -10 1868.69   48.76   1 0.00000 0.00000 0.00000 0.00000 0.00000 0.00000
   5   4   5  565.82   17.01  -2 0.00000 0.00000 0.00000 0.00000 0.00000 0.00000
   0  -4 -10  565.82   17.01   1 0.00000 0.00000 0.00000 0.00000 0.00000 0.00000
  -5  -4  -5  561.29   20.41  -2 0.00000 0.00000 0.00000 0.00000 0.00000 0.00000
   0   4  10  561.29   20.41   1 0.00000 0.00000 0.00000 0.00000 0.00000 0.00000
   4   4   8  133.80    9.07  -2 0.00000 0.00000 0.00000 0.00000 0.00000 0.00000
  -2  -4 -10  133.80    9.07   1 0.00000 0.00000 0.00000 0.00000 0.00000 0.00000
  -4  -4  -8  138.34   12.47  -2 0.00000 0.00000 0.00000 0.00000 0.00000 0.00000
   2   4  10  138.34   12.47   1 0.00000 0.00000 0.00000 0.00000 0.00000 0.00000
   3   4  11  864.04   23.81  -2 0.00000 0.00000 0.00000 0.00000 0.00000 0.00000
  -4  -4 -10  864.04   23.81   1 0.00000 0.00000 0.00000 0.00000 0.00000 0.00000
  -3  -4 -11  815.28   34.02  -2 0.00000 0.00000 0.00000 0.00000 0.00000 0.00000
   4   4  10  815.28   34.02   1 0.00000 0.00000 0.00000 0.00000 0.00000 0.00000
  -7   5   1  619.12   31.75  -2 0.00000 0.00000 0.00000 0.00000 0.00000 0.00000
  -4  -5  10  619.12   31.75   1 0.00000 0.00000 0.00000 0.00000 0.00000 0.00000
   7  -5  -1  492.12   51.03  -2 0.00000 0.00000 0.00000 0.00000 0.00000 0.00000
   4   5 -10  492.12   51.03   1 0.00000 0.00000 0.00000 0.00000 0.00000 0.00000
  -6   5  -2    1.13    9.07  -2 0.00000 0.00000 0.00000 0.00000 0.00000 0.00000
  -2  -5  10    1.13    9.07   1 0.00000 0.00000 0.00000 0.00000 0.00000 0.00000
   6  -5   2    0.00   11.34  -2 0.00000 0.00000 0.00000 0.00000 0.00000 0.00000
   2   5 -10    0.00   11.34   1 0.00000 0.00000 0.00000 0.00000 0.00000 0.00000
   5   5   5 1062.48   23.81  -2 0.00000 0.00000 0.00000 0.00000 0.00000 0.00000
   0  -5 -10 1062.48   23.81   1 0.00000 0.00000 0.00000 0.00000 0.00000 0.00000
  -5  -5  -5 1014.85   38.55  -2 0.00000 0.00000 0.00000 0.00000 0.00000 0.00000
   0   5  10 1014.85   38.55   1 0.00000 0.00000 0.00000 0.00000 0.00000 0.00000
   4   5   8 1170.20   27.21  -2 0.00000 0.00000 0.00000 0.00000 0.00000 0.00000
  -2  -5 -10 1170.20   27.21   1 0.00000 0.00000 0.00000 0.00000 0.00000 0.00000
  -4  -5  -8 1131.65   47.62  -2 0.00000 0.00000 0.00000 0.00000 0.00000 0.00000
   2   5  10 1131.65   47.62   1 0.00000 0.00000 0.00000 0.00000 0.00000 0.00000
   3   5  11   14.74   10.21  -2 0.00000 0.00000 0.00000 0.00000 0.00000 0.00000
  -4  -5 -10   14.74   10.21   1 0.00000 0.00000 0.00000 0.00000 0.00000 0.00000
  -3  -5 -11   18.14   24.95  -2 0.00000 0.00000 0.00000 0.00000 0.00000 0.00000
   4   5  10   18.14   24.95   1 0.00000 0.00000 0.00000 0.00000 0.00000 0.00000
  -6   6  -2  825.49   37.42  -2 0.00000 0.00000 0.00000 0.00000 0.00000 0.00000
  -2  -6  10  825.49   37.42   1 0.00000 0.00000 0.00000 0.00000 0.00000 0.00000
   6  -6   2  887.85   64.63  -2 0.00000 0.00000 0.00000 0.00000 0.00000 0.00000
   2   6 -10  887.85   64.63   1 0.00000 0.00000 0.00000 0.00000 0.00000 0.00000
   5   6   5  219.98   13.61  -2 0.00000 0.00000 0.00000 0.00000 0.00000 0.00000
   0  -6 -10  219.98   13.61   1 0.00000 0.00000 0.00000 0.00000 0.00000 0.00000
  -5  -6  -5  208.64   36.29  -2 0.00000 0.00000 0.00000 0.00000 0.00000 0.00000
   0   6  10  208.64   36.29   1 0.00000 0.00000 0.00000 0.00000 0.00000 0.00000
   4   6   8   31.75    9.07  -2 0.00000 0.00000 0.00000 0.00000 0.00000 0.00000
  -2  -6 -10   31.75    9.07   1 0.00000 0.00000 0.00000 0.00000 0.00000 0.00000
  -4  -6  -8   17.01   31.75  -2 0.00000 0.00000 0.00000 0.00000 0.00000 0.00000
   2   6  10   17.01   31.75   1 0.00000 0.00000 0.00000 0.00000 0.00000 0.00000
   9   0  -5  771.06   30.62  -2 0.00000 0.00000 0.00000 0.00000 0.00000 0.00000
   7   0 -11  771.06   30.62   1 0.00000 0.00000 0.00000 0.00000 0.00000 0.00000
   8   0  -2  328.84   18.14  -2 0.00000 0.00000 0.00000 0.00000 0.00000 0.00000
   5   0 -11  328.84   18.14   1 0.00000 0.00000 0.00000 0.00000 0.00000 0.00000
   7   0   1  462.64   13.61  -2 0.00000 0.00000 0.00000 0.00000 0.00000 0.00000
   3   0 -11  462.64   13.61   1 0.00000 0.00000 0.00000 0.00000 0.00000 0.00000
   6   0   4 1848.28   37.42  -2 0.00000 0.00000 0.00000 0.00000 0.00000 0.00000
   1   0 -11 1848.28   37.42   1 0.00000 0.00000 0.00000 0.00000 0.00000 0.00000
  -5   0  -7  548.81   20.41  -2 0.00000 0.00000 0.00000 0.00000 0.00000 0.00000
   1   0  11  548.81   20.41   1 0.00000 0.00000 0.00000 0.00000 0.00000 0.00000
  -4   0 -10    7.94    6.80  -2 0.00000 0.00000 0.00000 0.00000 0.00000 0.00000
   3   0  11    7.94    6.80   1 0.00000 0.00000 0.00000 0.00000 0.00000 0.00000
  -3   0 -13  191.63   12.47  -2 0.00000 0.00000 0.00000 0.00000 0.00000 0.00000
   5   0  11  191.63   12.47   1 0.00000 0.00000 0.00000 0.00000 0.00000 0.00000
  -2   0 -16   37.42   18.14  -2 0.00000 0.00000 0.00000 0.00000 0.00000 0.00000
   7   0  11   37.42   18.14   1 0.00000 0.00000 0.00000 0.00000 0.00000 0.00000
  -9   1   5   28.35   11.34  -2 0.00000 0.00000 0.00000 0.00000 0.00000 0.00000
  -7  -1  11   28.35   11.34   1 0.00000 0.00000 0.00000 0.00000 0.00000 0.00000
   9  -1  -5   18.14    9.07  -2 0.00000 0.00000 0.00000 0.00000 0.00000 0.00000
   7   1 -11   18.14    9.07   1 0.00000 0.00000 0.00000 0.00000 0.00000 0.00000
  -8   1   2  538.61   22.68  -2 0.00000 0.00000 0.00000 0.00000 0.00000 0.00000
  -5  -1  11  538.61   22.68   1 0.00000 0.00000 0.00000 0.00000 0.00000 0.00000
   8  -1  -2  498.92   18.14  -2 0.00000 0.00000 0.00000 0.00000 0.00000 0.00000
   5   1 -11  498.92   18.14   1 0.00000 0.00000 0.00000 0.00000 0.00000 0.00000
  -7   1  -1  773.33   20.41  -2 0.00000 0.00000 0.00000 0.00000 0.00000 0.00000
  -3  -1  11  773.33   20.41   1 0.00000 0.00000 0.00000 0.00000 0.00000 0.00000
   7  -1   1  723.44   19.28  -2 0.00000 0.00000 0.00000 0.00000 0.00000 0.00000
   3   1 -11  723.44   19.28   1 0.00000 0.00000 0.00000 0.00000 0.00000 0.00000
  -6   1  -4  130.40   10.21  -2 0.00000 0.00000 0.00000 0.00000 0.00000 0.00000
  -1  -1  11  130.40   10.21   1 0.00000 0.00000 0.00000 0.00000 0.00000 0.00000
   6  -1   4  123.60   10.21  -2 0.00000 0.00000 0.00000 0.00000 0.00000 0.00000
   1   1 -11  123.60   10.21   1 0.00000 0.00000 0.00000 0.00000 0.00000 0.00000
   5   1   7  295.95   13.61  -2 0.00000 0.00000 0.00000 0.00000 0.00000 0.00000
  -1  -1 -11  295.95   13.61   1 0.00000 0.00000 0.00000 0.00000 0.00000 0.00000
  -5  -1  -7  233.59   14.74  -2 0.00000 0.00000 0.00000 0.00000 0.00000 0.00000
   1   1  11  233.59   14.74   1 0.00000 0.00000 0.00000 0.00000 0.00000 0.00000
   4   1  10  408.21   13.61  -2 0.00000 0.00000 0.00000 0.00000 0.00000 0.00000
  -3  -1 -11  408.21   13.61   1 0.00000 0.00000 0.00000 0.00000 0.00000 0.00000
  -4  -1 -10  413.88   19.28  -2 0.00000 0.00000 0.00000 0.00000 0.00000 0.00000
   3   1  11  413.88   19.28   1 0.00000 0.00000 0.00000 0.00000 0.00000 0.00000
   3   1  13  105.45   11.34  -2 0.00000 0.00000 0.00000 0.00000 0.00000 0.00000
  -5  -1 -11  105.45   11.34   1 0.00000 0.00000 0.00000 0.00000 0.00000 0.00000
  -3  -1 -13  120.19   13.61  -2 0.00000 0.00000 0.00000 0.00000 0.00000 0.00000
   5   1  11  120.19   13.61   1 0.00000 0.00000 0.00000 0.00000 0.00000 0.00000
   2   1  16   12.47   17.01  -2 0.00000 0.00000 0.00000 0.00000 0.00000 0.00000
  -7  -1 -11   12.47   17.01   1 0.00000 0.00000 0.00000 0.00000 0.00000 0.00000
  -2  -1 -16   13.61   18.14  -2 0.00000 0.00000 0.00000 0.00000 0.00000 0.00000
   7   1  11   13.61   18.14   1 0.00000 0.00000 0.00000 0.00000 0.00000 0.00000
  -9   2   5  240.39   17.01  -2 0.00000 0.00000 0.00000 0.00000 0.00000 0.00000
  -7  -2  11  240.39   17.01   1 0.00000 0.00000 0.00000 0.00000 0.00000 0.00000
  -8   2   2  222.25   15.87  -2 0.00000 0.00000 0.00000 0.00000 0.00000 0.00000
  -5  -2  11  222.25   15.87   1 0.00000 0.00000 0.00000 0.00000 0.00000 0.00000
   8  -2  -2  241.52   15.87  -2 0.00000 0.00000 0.00000 0.00000 0.00000 0.00000
   5   2 -11  241.52   15.87   1 0.00000 0.00000 0.00000 0.00000 0.00000 0.00000
  -7   2  -1   37.42    5.67  -2 0.00000 0.00000 0.00000 0.00000 0.00000 0.00000
  -3  -2  11   37.42    5.67   1 0.00000 0.00000 0.00000 0.00000 0.00000 0.00000
   7  -2   1   41.95    9.07  -2 0.00000 0.00000 0.00000 0.00000 0.00000 0.00000
   3   2 -11   41.95    9.07   1 0.00000 0.00000 0.00000 0.00000 0.00000 0.00000
  -6   2  -4  463.77   15.87  -2 0.00000 0.00000 0.00000 0.00000 0.00000 0.00000
  -1  -2  11  463.77   15.87   1 0.00000 0.00000 0.00000 0.00000 0.00000 0.00000
   6  -2   4  447.90   20.41  -2 0.00000 0.00000 0.00000 0.00000 0.00000 0.00000
   1   2 -11  447.90   20.41   1 0.00000 0.00000 0.00000 0.00000 0.00000 0.00000
   5   2   7  490.98   15.87  -2 0.00000 0.00000 0.00000 0.00000 0.00000 0.00000
  -1  -2 -11  490.98   15.87   1 0.00000 0.00000 0.00000 0.00000 0.00000 0.00000
  -5  -2  -7  489.85   19.28  -2 0.00000 0.00000 0.00000 0.00000 0.00000 0.00000
   1   2  11  489.85   19.28   1 0.00000 0.00000 0.00000 0.00000 0.00000 0.00000
   4   2  10  175.76    9.07  -2 0.00000 0.00000 0.00000 0.00000 0.00000 0.00000
  -3  -2 -11  175.76    9.07   1 0.00000 0.00000 0.00000 0.00000 0.00000 0.00000
  -4  -2 -10  179.16   13.61  -2 0.00000 0.00000 0.00000 0.00000 0.00000 0.00000
   3   2  11  179.16   13.61   1 0.00000 0.00000 0.00000 0.00000 0.00000 0.00000
   3   2  13    2.27    9.07  -2 0.00000 0.00000 0.00000 0.00000 0.00000 0.00000
  -5  -2 -11    2.27    9.07   1 0.00000 0.00000 0.00000 0.00000 0.00000 0.00000
  -3  -2 -13    4.54   12.47  -2 0.00000 0.00000 0.00000 0.00000 0.00000 0.00000
   5   2  11    4.54   12.47   1 0.00000 0.00000 0.00000 0.00000 0.00000 0.00000
   3   2  14    5.67   13.61  -2 0.00000 0.00000 0.00000 0.00000 0.00000 0.00000
  -6  -2 -11    5.67   13.61   1 0.00000 0.00000 0.00000 0.00000 0.00000 0.00000
  -3  -2 -14    0.00   11.34  -2 0.00000 0.00000 0.00000 0.00000 0.00000 0.00000
   6   2  11    0.00   11.34   1 0.00000 0.00000 0.00000 0.00000 0.00000 0.00000
  -8   3   2   13.61   15.87  -2 0.00000 0.00000 0.00000 0.00000 0.00000 0.00000
  -5  -3  11   13.61   15.87   1 0.00000 0.00000 0.00000 0.00000 0.00000 0.00000
   8  -3  -2    3.40   10.21  -2 0.00000 0.00000 0.00000 0.00000 0.00000 0.00000
   5   3 -11    3.40   10.21   1 0.00000 0.00000 0.00000 0.00000 0.00000 0.00000
  -7   3  -1  168.95   13.61  -2 0.00000 0.00000 0.00000 0.00000 0.00000 0.00000
  -3  -3  11  168.95   13.61   1 0.00000 0.00000 0.00000 0.00000 0.00000 0.00000
   7  -3   1  147.41   13.61  -2 0.00000 0.00000 0.00000 0.00000 0.00000 0.00000
   3   3 -11  147.41   13.61   1 0.00000 0.00000 0.00000 0.00000 0.00000 0.00000
  -6   3  -4  540.88   18.14  -2 0.00000 0.00000 0.00000 0.00000 0.00000 0.00000
  -1  -3  11  540.88   18.14   1 0.00000 0.00000 0.00000 0.00000 0.00000 0.00000
   6  -3   4  456.97   17.01  -2 0.00000 0.00000 0.00000 0.00000 0.00000 0.00000
   1   3 -11  456.97   17.01   1 0.00000 0.00000 0.00000 0.00000 0.00000 0.00000
   5   3   7   81.64    9.07  -2 0.00000 0.00000 0.00000 0.00000 0.00000 0.00000
  -1  -3 -11   81.64    9.07   1 0.00000 0.00000 0.00000 0.00000 0.00000 0.00000
  -5  -3  -7  106.59   10.21  -2 0.00000 0.00000 0.00000 0.00000 0.00000 0.00000
   1   3  11  106.59   10.21   1 0.00000 0.00000 0.00000 0.00000 0.00000 0.00000
   4   3  10   85.04    7.94  -2 0.00000 0.00000 0.00000 0.00000 0.00000 0.00000
  -3  -3 -11   85.04    7.94   1 0.00000 0.00000 0.00000 0.00000 0.00000 0.00000
  -4  -3 -10   87.31   12.47  -2 0.00000 0.00000 0.00000 0.00000 0.00000 0.00000
   3   3  11   87.31   12.47   1 0.00000 0.00000 0.00000 0.00000 0.00000 0.00000
   3   3  13  437.69   21.54  -2 0.00000 0.00000 0.00000 0.00000 0.00000 0.00000
  -5  -3 -11  437.69   21.54   1 0.00000 0.00000 0.00000 0.00000 0.00000 0.00000
  -3  -3 -13  464.90   30.62  -2 0.00000 0.00000 0.00000 0.00000 0.00000 0.00000
   5   3  11  464.90   30.62   1 0.00000 0.00000 0.00000 0.00000 0.00000 0.00000
   3   3  14   88.45   19.28  -2 0.00000 0.00000 0.00000 0.00000 0.00000 0.00000
  -6  -3 -11   88.45   19.28   1 0.00000 0.00000 0.00000 0.00000 0.00000 0.00000
  -3  -3 -14  107.72   23.81  -2 0.00000 0.00000 0.00000 0.00000 0.00000 0.00000
   6   3  11  107.72   23.81   1 0.00000 0.00000 0.00000 0.00000 0.00000 0.00000
  -8   4   2   77.11   19.28  -2 0.00000 0.00000 0.00000 0.00000 0.00000 0.00000
  -5  -4  11   77.11   19.28   1 0.00000 0.00000 0.00000 0.00000 0.00000 0.00000
   8  -4  -2   28.35   24.95  -2 0.00000 0.00000 0.00000 0.00000 0.00000 0.00000
   5   4 -11   28.35   24.95   1 0.00000 0.00000 0.00000 0.00000 0.00000 0.00000
  -7   4  -1  125.86   11.34  -2 0.00000 0.00000 0.00000 0.00000 0.00000 0.00000
  -3  -4  11  125.86   11.34   1 0.00000 0.00000 0.00000 0.00000 0.00000 0.00000
   7  -4   1  141.74   17.01  -2 0.00000 0.00000 0.00000 0.00000 0.00000 0.00000
   3   4 -11  141.74   17.01   1 0.00000 0.00000 0.00000 0.00000 0.00000 0.00000
  -6   4  -4   12.47    6.80  -2 0.00000 0.00000 0.00000 0.00000 0.00000 0.00000
  -1  -4  11   12.47    6.80   1 0.00000 0.00000 0.00000 0.00000 0.00000 0.00000
   6  -4   4    6.80    9.07  -2 0.00000 0.00000 0.00000 0.00000 0.00000 0.00000
   1   4 -11    6.80    9.07   1 0.00000 0.00000 0.00000 0.00000 0.00000 0.00000
   5   4   7  385.53   13.61  -2 0.00000 0.00000 0.00000 0.00000 0.00000 0.00000
  -1  -4 -11  385.53   13.61   1 0.00000 0.00000 0.00000 0.00000 0.00000 0.00000
  -5  -4  -7  357.18   15.87  -2 0.00000 0.00000 0.00000 0.00000 0.00000 0.00000
   1   4  11  357.18   15.87   1 0.00000 0.00000 0.00000 0.00000 0.00000 0.00000
   4   4  10  918.47   22.68  -2 0.00000 0.00000 0.00000 0.00000 0.00000 0.00000
  -3  -4 -11  918.47   22.68   1 0.00000 0.00000 0.00000 0.00000 0.00000 0.00000
  -4  -4 -10  968.36   37.42  -2 0.00000 0.00000 0.00000 0.00000 0.00000 0.00000
   3   4  11  968.36   37.42   1 0.00000 0.00000 0.00000 0.00000 0.00000 0.00000
   3   4  13   95.25   14.74  -2 0.00000 0.00000 0.00000 0.00000 0.00000 0.00000
  -5  -4 -11   95.25   14.74   1 0.00000 0.00000 0.00000 0.00000 0.00000 0.00000
  -3  -4 -13   73.70   40.82  -2 0.00000 0.00000 0.00000 0.00000 0.00000 0.00000
   5   4  11   73.70   40.82   1 0.00000 0.00000 0.00000 0.00000 0.00000 0.00000
  -7   5  -1   46.49   14.74  -2 0.00000 0.00000 0.00000 0.00000 0.00000 0.00000
  -3  -5  11   46.49   14.74   1 0.00000 0.00000 0.00000 0.00000 0.00000 0.00000
   7  -5   1   37.42   13.61  -2 0.00000 0.00000 0.00000 0.00000 0.00000 0.00000
   3   5 -11   37.42   13.61   1 0.00000 0.00000 0.00000 0.00000 0.00000 0.00000
  -6   5  -4  485.32   18.14  -2 0.00000 0.00000 0.00000 0.00000 0.00000 0.00000
  -1  -5  11  485.32   18.14   1 0.00000 0.00000 0.00000 0.00000 0.00000 0.00000
   6  -5   4  489.85   22.68  -2 0.00000 0.00000 0.00000 0.00000 0.00000 0.00000
   1   5 -11  489.85   22.68   1 0.00000 0.00000 0.00000 0.00000 0.00000 0.00000
   5   5   7  225.65   12.47  -2 0.00000 0.00000 0.00000 0.00000 0.00000 0.00000
  -1  -5 -11  225.65   12.47   1 0.00000 0.00000 0.00000 0.00000 0.00000 0.00000
  -5  -5  -7  183.69   28.35  -2 0.00000 0.00000 0.00000 0.00000 0.00000 0.00000
   1   5  11  183.69   28.35   1 0.00000 0.00000 0.00000 0.00000 0.00000 0.00000
   4   5  10   14.74   10.21  -2 0.00000 0.00000 0.00000 0.00000 0.00000 0.00000
  -3  -5 -11   14.74   10.21   1 0.00000 0.00000 0.00000 0.00000 0.00000 0.00000
  -4  -5 -10   20.41   24.95  -2 0.00000 0.00000 0.00000 0.00000 0.00000 0.00000
   3   5  11   20.41   24.95   1 0.00000 0.00000 0.00000 0.00000 0.00000 0.00000
   9   0  -3   17.01   10.21  -2 0.00000 0.00000 0.00000 0.00000 0.00000 0.00000
   6   0 -12   17.01   10.21   1 0.00000 0.00000 0.00000 0.00000 0.00000 0.00000
   8   0   0  576.03   20.41  -2 0.00000 0.00000 0.00000 0.00000 0.00000 0.00000
   4   0 -12  576.03   20.41   1 0.00000 0.00000 0.00000 0.00000 0.00000 0.00000
   7   0   3 1866.42   37.42  -2 0.00000 0.00000 0.00000 0.00000 0.00000 0.00000
   2   0 -12 1866.42   37.42   1 0.00000 0.00000 0.00000 0.00000 0.00000 0.00000
  -6   0  -6  419.55   14.74  -2 0.00000 0.00000 0.00000 0.00000 0.00000 0.00000
   0   0  12  419.55   14.74   1 0.00000 0.00000 0.00000 0.00000 0.00000 0.00000
  -5   0  -9  951.35   28.35  -2 0.00000 0.00000 0.00000 0.00000 0.00000 0.00000
   2   0  12  951.35   28.35   1 0.00000 0.00000 0.00000 0.00000 0.00000 0.00000
  -4   0 -12 2221.34   52.16  -2 0.00000 0.00000 0.00000 0.00000 0.00000 0.00000
   4   0  12 2221.34   52.16   1 0.00000 0.00000 0.00000 0.00000 0.00000 0.00000
  -3   0 -15  244.93   26.08  -2 0.00000 0.00000 0.00000 0.00000 0.00000 0.00000
   6   0  12  244.93   26.08   1 0.00000 0.00000 0.00000 0.00000 0.00000 0.00000
  -9   1   3  345.84   28.35  -2 0.00000 0.00000 0.00000 0.00000 0.00000 0.00000
  -6  -1  12  345.84   28.35   1 0.00000 0.00000 0.00000 0.00000 0.00000 0.00000
   9  -1  -3  399.14   18.14  -2 0.00000 0.00000 0.00000 0.00000 0.00000 0.00000
   6   1 -12  399.14   18.14   1 0.00000 0.00000 0.00000 0.00000 0.00000 0.00000
  -8   1   0  254.00   14.74  -2 0.00000 0.00000 0.00000 0.00000 0.00000 0.00000
  -4  -1  12  254.00   14.74   1 0.00000 0.00000 0.00000 0.00000 0.00000 0.00000
   8  -1   0  249.46   12.47  -2 0.00000 0.00000 0.00000 0.00000 0.00000 0.00000
   4   1 -12  249.46   12.47   1 0.00000 0.00000 0.00000 0.00000 0.00000 0.00000
  -7   1  -3  210.91   10.21  -2 0.00000 0.00000 0.00000 0.00000 0.00000 0.00000
  -2  -1  12  210.91   10.21   1 0.00000 0.00000 0.00000 0.00000 0.00000 0.00000
   7  -1   3  192.77   11.34  -2 0.00000 0.00000 0.00000 0.00000 0.00000 0.00000
   2   1 -12  192.77   11.34   1 0.00000 0.00000 0.00000 0.00000 0.00000 0.00000
   6   1   6 1839.21   40.82  -2 0.00000 0.00000 0.00000 0.00000 0.00000 0.00000
   0  -1 -12 1839.21   40.82   1 0.00000 0.00000 0.00000 0.00000 0.00000 0.00000
  -6  -1  -6 1869.82   54.43  -2 0.00000 0.00000 0.00000 0.00000 0.00000 0.00000
   0   1  12 1869.82   54.43   1 0.00000 0.00000 0.00000 0.00000 0.00000 0.00000
   5   1   9  928.68   24.95  -2 0.00000 0.00000 0.00000 0.00000 0.00000 0.00000
  -2  -1 -12  928.68   24.95   1 0.00000 0.00000 0.00000 0.00000 0.00000 0.00000
  -5  -1  -9  924.14   27.21  -2 0.00000 0.00000 0.00000 0.00000 0.00000 0.00000
   2   1  12  924.14   27.21   1 0.00000 0.00000 0.00000 0.00000 0.00000 0.00000
   4   1  12   -1.13    5.67  -2 0.00000 0.00000 0.00000 0.00000 0.00000 0.00000
  -4  -1 -12   -1.13    5.67   1 0.00000 0.00000 0.00000 0.00000 0.00000 0.00000
  -4  -1 -12    7.94   12.47  -2 0.00000 0.00000 0.00000 0.00000 0.00000 0.00000
   4   1  12    7.94   12.47   1 0.00000 0.00000 0.00000 0.00000 0.00000 0.00000
   3   1  15  446.76   32.88  -2 0.00000 0.00000 0.00000 0.00000 0.00000 0.00000
  -6  -1 -12  446.76   32.88   1 0.00000 0.00000 0.00000 0.00000 0.00000 0.00000
  -3  -1 -15  413.88   37.42  -2 0.00000 0.00000 0.00000 0.00000 0.00000 0.00000
   6   1  12  413.88   37.42   1 0.00000 0.00000 0.00000 0.00000 0.00000 0.00000
  -9   2   3   26.08   18.14  -2 0.00000 0.00000 0.00000 0.00000 0.00000 0.00000
  -6  -2  12   26.08   18.14   1 0.00000 0.00000 0.00000 0.00000 0.00000 0.00000
   9  -2  -3   30.62   12.47  -2 0.00000 0.00000 0.00000 0.00000 0.00000 0.00000
   6   2 -12   30.62   12.47   1 0.00000 0.00000 0.00000 0.00000 0.00000 0.00000
  -8   2   0  418.41   18.14  -2 0.00000 0.00000 0.00000 0.00000 0.00000 0.00000
  -4  -2  12  418.41   18.14   1 0.00000 0.00000 0.00000 0.00000 0.00000 0.00000
   8  -2   0  371.92   18.14  -2 0.00000 0.00000 0.00000 0.00000 0.00000 0.00000
   4   2 -12  371.92   18.14   1 0.00000 0.00000 0.00000 0.00000 0.00000 0.00000
  -7   2  -3  555.62   18.14  -2 0.00000 0.00000 0.00000 0.00000 0.00000 0.00000
  -2  -2  12  555.62   18.14   1 0.00000 0.00000 0.00000 0.00000 0.00000 0.00000
   7  -2   3  480.78   22.68  -2 0.00000 0.00000 0.00000 0.00000 0.00000 0.00000
   2   2 -12  480.78   22.68   1 0.00000 0.00000 0.00000 0.00000 0.00000 0.00000
   6   2   6   80.51   10.21  -2 0.00000 0.00000 0.00000 0.00000 0.00000 0.00000
   0  -2 -12   80.51   10.21   1 0.00000 0.00000 0.00000 0.00000 0.00000 0.00000
  -6  -2  -6   49.89   11.34  -2 0.00000 0.00000 0.00000 0.00000 0.00000 0.00000
   0   2  12   49.89   11.34   1 0.00000 0.00000 0.00000 0.00000 0.00000 0.00000
   5   2   9  451.30   14.74  -2 0.00000 0.00000 0.00000 0.00000 0.00000 0.00000
  -2  -2 -12  451.30   14.74   1 0.00000 0.00000 0.00000 0.00000 0.00000 0.00000
  -5  -2  -9  495.52   28.35  -2 0.00000 0.00000 0.00000 0.00000 0.00000 0.00000
   2   2  12  495.52   28.35   1 0.00000 0.00000 0.00000 0.00000 0.00000 0.00000
   4   2  12  822.09   21.54  -2 0.00000 0.00000 0.00000 0.00000 0.00000 0.00000
  -4  -2 -12  822.09   21.54   1 0.00000 0.00000 0.00000 0.00000 0.00000 0.00000
  -4  -2 -12  811.88   32.88  -2 0.00000 0.00000 0.00000 0.00000 0.00000 0.00000
   4   2  12  811.88   32.88   1 0.00000 0.00000 0.00000 0.00000 0.00000 0.00000
   4   2  13  142.87   15.87  -2 0.00000 0.00000 0.00000 0.00000 0.00000 0.00000
  -5  -2 -12  142.87   15.87   1 0.00000 0.00000 0.00000 0.00000 0.00000 0.00000
  -4  -2 -13  138.34   22.68  -2 0.00000 0.00000 0.00000 0.00000 0.00000 0.00000
   5   2  12  138.34   22.68   1 0.00000 0.00000 0.00000 0.00000 0.00000 0.00000
   3   2  15  113.39   22.68  -2 0.00000 0.00000 0.00000 0.00000 0.00000 0.00000
  -6  -2 -12  113.39   22.68   1 0.00000 0.00000 0.00000 0.00000 0.00000 0.00000
  -3  -2 -15  116.79   29.48  -2 0.00000 0.00000 0.00000 0.00000 0.00000 0.00000
   6   2  12  116.79   29.48   1 0.00000 0.00000 0.00000 0.00000 0.00000 0.00000
  -9   3   3   38.55   21.54  -2 0.00000 0.00000 0.00000 0.00000 0.00000 0.00000
  -6  -3  12   38.55   21.54   1 0.00000 0.00000 0.00000 0.00000 0.00000 0.00000
  -8   3   0    7.94   11.34  -2 0.00000 0.00000 0.00000 0.00000 0.00000 0.00000
  -4  -3  12    7.94   11.34   1 0.00000 0.00000 0.00000 0.00000 0.00000 0.00000
   8  -3   0   13.61   14.74  -2 0.00000 0.00000 0.00000 0.00000 0.00000 0.00000
   4   3 -12   13.61   14.74   1 0.00000 0.00000 0.00000 0.00000 0.00000 0.00000
  -7   3  -3  272.14   12.47  -2 0.00000 0.00000 0.00000 0.00000 0.00000 0.00000
  -2  -3  12  272.14   12.47   1 0.00000 0.00000 0.00000 0.00000 0.00000 0.00000
   7  -3   3  254.00   14.74  -2 0.00000 0.00000 0.00000 0.00000 0.00000 0.00000
   2   3 -12  254.00   14.74   1 0.00000 0.00000 0.00000 0.00000 0.00000 0.00000
   6   3   6  336.77   14.74  -2 0.00000 0.00000 0.00000 0.00000 0.00000 0.00000
   0  -3 -12  336.77   14.74   1 0.00000 0.00000 0.00000 0.00000 0.00000 0.00000
  -6  -3  -6  365.12   18.14  -2 0.00000 0.00000 0.00000 0.00000 0.00000 0.00000
   0   3  12  365.12   18.14   1 0.00000 0.00000 0.00000 0.00000 0.00000 0.00000
   5   3   9   49.89    9.07  -2 0.00000 0.00000 0.00000 0.00000 0.00000 0.00000
  -2  -3 -12   49.89    9.07   1 0.00000 0.00000 0.00000 0.00000 0.00000 0.00000
  -5  -3  -9   36.29   11.34  -2 0.00000 0.00000 0.00000 0.00000 0.00000 0.00000
   2   3  12   36.29   11.34   1 0.00000 0.00000 0.00000 0.00000 0.00000 0.00000
   4   3  12   -4.54    7.94  -2 0.00000 0.00000 0.00000 0.00000 0.00000 0.00000
  -4  -3 -12   -4.54    7.94   1 0.00000 0.00000 0.00000 0.00000 0.00000 0.00000
  -4  -3 -12    1.13   12.47  -2 0.00000 0.00000 0.00000 0.00000 0.00000 0.00000
   4   3  12    1.13   12.47   1 0.00000 0.00000 0.00000 0.00000 0.00000 0.00000
   4   3  13   53.29   13.61  -2 0.00000 0.00000 0.00000 0.00000 0.00000 0.00000
  -5  -3 -12   53.29   13.61   1 0.00000 0.00000 0.00000 0.00000 0.00000 0.00000
  -4  -3 -13   48.76   18.14  -2 0.00000 0.00000 0.00000 0.00000 0.00000 0.00000
   5   3  12   48.76   18.14   1 0.00000 0.00000 0.00000 0.00000 0.00000 0.00000
  -8   4   0  171.22   27.21  -2 0.00000 0.00000 0.00000 0.00000 0.00000 0.00000
  -4  -4  12  171.22   27.21   1 0.00000 0.00000 0.00000 0.00000 0.00000 0.00000
   8  -4   0  121.33   24.95  -2 0.00000 0.00000 0.00000 0.00000 0.00000 0.00000
   4   4 -12  121.33   24.95   1 0.00000 0.00000 0.00000 0.00000 0.00000 0.00000
  -7   4  -3    3.40    5.67  -2 0.00000 0.00000 0.00000 0.00000 0.00000 0.00000
  -2  -4  12    3.40    5.67   1 0.00000 0.00000 0.00000 0.00000 0.00000 0.00000
   7  -4   3   -3.40   12.47  -2 0.00000 0.00000 0.00000 0.00000 0.00000 0.00000
   2   4 -12   -3.40   12.47   1 0.00000 0.00000 0.00000 0.00000 0.00000 0.00000
   6   4   6   36.29    7.94  -2 0.00000 0.00000 0.00000 0.00000 0.00000 0.00000
   0  -4 -12   36.29    7.94   1 0.00000 0.00000 0.00000 0.00000 0.00000 0.00000
  -6  -4  -6   38.55   10.21  -2 0.00000 0.00000 0.00000 0.00000 0.00000 0.00000
   0   4  12   38.55   10.21   1 0.00000 0.00000 0.00000 0.00000 0.00000 0.00000
   5   4   9   75.97   10.21  -2 0.00000 0.00000 0.00000 0.00000 0.00000 0.00000
  -2  -4 -12   75.97   10.21   1 0.00000 0.00000 0.00000 0.00000 0.00000 0.00000
  -5  -4  -9   85.04   13.61  -2 0.00000 0.00000 0.00000 0.00000 0.00000 0.00000
   2   4  12   85.04   13.61   1 0.00000 0.00000 0.00000 0.00000 0.00000 0.00000
   4   4  12   38.55   12.47  -2 0.00000 0.00000 0.00000 0.00000 0.00000 0.00000
  -4  -4 -12   38.55   12.47   1 0.00000 0.00000 0.00000 0.00000 0.00000 0.00000
  -4  -4 -12   85.04   39.69  -2 0.00000 0.00000 0.00000 0.00000 0.00000 0.00000
   4   4  12   85.04   39.69   1 0.00000 0.00000 0.00000 0.00000 0.00000 0.00000
  -7   5  -3  179.16   24.95  -2 0.00000 0.00000 0.00000 0.00000 0.00000 0.00000
  -2  -5  12  179.16   24.95   1 0.00000 0.00000 0.00000 0.00000 0.00000 0.00000
   7  -5   3  189.36   21.54  -2 0.00000 0.00000 0.00000 0.00000 0.00000 0.00000
   2   5 -12  189.36   21.54   1 0.00000 0.00000 0.00000 0.00000 0.00000 0.00000
   6   5   6   54.43   11.34  -2 0.00000 0.00000 0.00000 0.00000 0.00000 0.00000
   0  -5 -12   54.43   11.34   1 0.00000 0.00000 0.00000 0.00000 0.00000 0.00000
  -6  -5  -6   41.95   36.29  -2 0.00000 0.00000 0.00000 0.00000 0.00000 0.00000
   0   5  12   41.95   36.29   1 0.00000 0.00000 0.00000 0.00000 0.00000 0.00000
   5   5   9    1.13    9.07  -2 0.00000 0.00000 0.00000 0.00000 0.00000 0.00000
  -2  -5 -12    1.13    9.07   1 0.00000 0.00000 0.00000 0.00000 0.00000 0.00000
  -5  -5  -9  -20.41   35.15  -2 0.00000 0.00000 0.00000 0.00000 0.00000 0.00000
   2   5  12  -20.41   35.15   1 0.00000 0.00000 0.00000 0.00000 0.00000 0.00000
   9   0  -1   94.11   11.34  -2 0.00000 0.00000 0.00000 0.00000 0.00000 0.00000
   5   0 -13   94.11   11.34   1 0.00000 0.00000 0.00000 0.00000 0.00000 0.00000
   8   0   2    6.80    7.94  -2 0.00000 0.00000 0.00000 0.00000 0.00000 0.00000
   3   0 -13    6.80    7.94   1 0.00000 0.00000 0.00000 0.00000 0.00000 0.00000
   7   0   5   13.61    9.07  -2 0.00000 0.00000 0.00000 0.00000 0.00000 0.00000
   1   0 -13   13.61    9.07   1 0.00000 0.00000 0.00000 0.00000 0.00000 0.00000
  -6   0  -8  132.67   12.47  -2 0.00000 0.00000 0.00000 0.00000 0.00000 0.00000
   1   0  13  132.67   12.47   1 0.00000 0.00000 0.00000 0.00000 0.00000 0.00000
  -5   0 -11  236.99   13.61  -2 0.00000 0.00000 0.00000 0.00000 0.00000 0.00000
   3   0  13  236.99   13.61   1 0.00000 0.00000 0.00000 0.00000 0.00000 0.00000
  -4   0 -14   21.54   17.01  -2 0.00000 0.00000 0.00000 0.00000 0.00000 0.00000
   5   0  13   21.54   17.01   1 0.00000 0.00000 0.00000 0.00000 0.00000 0.00000
  -9   1   1    7.94   11.34  -2 0.00000 0.00000 0.00000 0.00000 0.00000 0.00000
  -5  -1  13    7.94   11.34   1 0.00000 0.00000 0.00000 0.00000 0.00000 0.00000
   9  -1  -1   29.48   11.34  -2 0.00000 0.00000 0.00000 0.00000 0.00000 0.00000
   5   1 -13   29.48   11.34   1 0.00000 0.00000 0.00000 0.00000 0.00000 0.00000
  -8   1  -2   31.75    7.94  -2 0.00000 0.00000 0.00000 0.00000 0.00000 0.00000
  -3  -1  13   31.75    7.94   1 0.00000 0.00000 0.00000 0.00000 0.00000 0.00000
   8  -1   2   31.75    9.07  -2 0.00000 0.00000 0.00000 0.00000 0.00000 0.00000
   3   1 -13   31.75    9.07   1 0.00000 0.00000 0.00000 0.00000 0.00000 0.00000
  -7   1  -5   -7.94    5.67  -2 0.00000 0.00000 0.00000 0.00000 0.00000 0.00000
  -1  -1  13   -7.94    5.67   1 0.00000 0.00000 0.00000 0.00000 0.00000 0.00000
   7  -1   5    4.54   11.34  -2 0.00000 0.00000 0.00000 0.00000 0.00000 0.00000
   1   1 -13    4.54   11.34   1 0.00000 0.00000 0.00000 0.00000 0.00000 0.00000
   6   1   8    3.40    9.07  -2 0.00000 0.00000 0.00000 0.00000 0.00000 0.00000
  -1  -1 -13    3.40    9.07   1 0.00000 0.00000 0.00000 0.00000 0.00000 0.00000
  -6  -1  -8    7.94   12.47  -2 0.00000 0.00000 0.00000 0.00000 0.00000 0.00000
   1   1  13    7.94   12.47   1 0.00000 0.00000 0.00000 0.00000 0.00000 0.00000
   5   1  11   87.31   10.21  -2 0.00000 0.00000 0.00000 0.00000 0.00000 0.00000
  -3  -1 -13   87.31   10.21   1 0.00000 0.00000 0.00000 0.00000 0.00000 0.00000
  -5  -1 -11   89.58   14.74  -2 0.00000 0.00000 0.00000 0.00000 0.00000 0.00000
   3   1  13   89.58   14.74   1 0.00000 0.00000 0.00000 0.00000 0.00000 0.00000
   4   1  14  331.10   22.68  -2 0.00000 0.00000 0.00000 0.00000 0.00000 0.00000
  -5  -1 -13  331.10   22.68   1 0.00000 0.00000 0.00000 0.00000 0.00000 0.00000
  -4  -1 -14  326.57   27.21  -2 0.00000 0.00000 0.00000 0.00000 0.00000 0.00000
   5   1  13  326.57   27.21   1 0.00000 0.00000 0.00000 0.00000 0.00000 0.00000
  -9   2   1   22.68   11.34  -2 0.00000 0.00000 0.00000 0.00000 0.00000 0.00000
  -5  -2  13   22.68   11.34   1 0.00000 0.00000 0.00000 0.00000 0.00000 0.00000
   9  -2  -1   10.21   12.47  -2 0.00000 0.00000 0.00000 0.00000 0.00000 0.00000
   5   2 -13   10.21   12.47   1 0.00000 0.00000 0.00000 0.00000 0.00000 0.00000
  -8   2  -2   57.83    7.94  -2 0.00000 0.00000 0.00000 0.00000 0.00000 0.00000
  -3  -2  13   57.83    7.94   1 0.00000 0.00000 0.00000 0.00000 0.00000 0.00000
   8  -2   2   46.49   11.34  -2 0.00000 0.00000 0.00000 0.00000 0.00000 0.00000
   3   2 -13   46.49   11.34   1 0.00000 0.00000 0.00000 0.00000 0.00000 0.00000
  -7   2  -5  154.21   11.34  -2 0.00000 0.00000 0.00000 0.00000 0.00000 0.00000
  -1  -2  13  154.21   11.34   1 0.00000 0.00000 0.00000 0.00000 0.00000 0.00000
   7  -2   5  109.99   12.47  -2 0.00000 0.00000 0.00000 0.00000 0.00000 0.00000
   1   2 -13  109.99   12.47   1 0.00000 0.00000 0.00000 0.00000 0.00000 0.00000
   6   2   8  233.59   14.74  -2 0.00000 0.00000 0.00000 0.00000 0.00000 0.00000
  -1  -2 -13  233.59   14.74   1 0.00000 0.00000 0.00000 0.00000 0.00000 0.00000
  -6  -2  -8  219.98   14.74  -2 0.00000 0.00000 0.00000 0.00000 0.00000 0.00000
   1   2  13  219.98   14.74   1 0.00000 0.00000 0.00000 0.00000 0.00000 0.00000
   5   2  11   23.81    9.07  -2 0.00000 0.00000 0.00000 0.00000 0.00000 0.00000
  -3  -2 -13   23.81    9.07   1 0.00000 0.00000 0.00000 0.00000 0.00000 0.00000
  -5  -2 -11   21.54   10.21  -2 0.00000 0.00000 0.00000 0.00000 0.00000 0.00000
   3   2  13   21.54   10.21   1 0.00000 0.00000 0.00000 0.00000 0.00000 0.00000
   5   2  12  124.73   12.47  -2 0.00000 0.00000 0.00000 0.00000 0.00000 0.00000
  -4  -2 -13  124.73   12.47   1 0.00000 0.00000 0.00000 0.00000 0.00000 0.00000
  -5  -2 -12  168.95   22.68  -2 0.00000 0.00000 0.00000 0.00000 0.00000 0.00000
   4   2  13  168.95   22.68   1 0.00000 0.00000 0.00000 0.00000 0.00000 0.00000
   4   2  14   24.95   13.61  -2 0.00000 0.00000 0.00000 0.00000 0.00000 0.00000
  -5  -2 -13   24.95   13.61   1 0.00000 0.00000 0.00000 0.00000 0.00000 0.00000
  -4  -2 -14   38.55   20.41  -2 0.00000 0.00000 0.00000 0.00000 0.00000 0.00000
   5   2  13   38.55   20.41   1 0.00000 0.00000 0.00000 0.00000 0.00000 0.00000
  -9   3   1  260.80   28.35  -2 0.00000 0.00000 0.00000 0.00000 0.00000 0.00000
  -5  -3  13  260.80   28.35   1 0.00000 0.00000 0.00000 0.00000 0.00000 0.00000
   9  -3  -1  197.30   31.75  -2 0.00000 0.00000 0.00000 0.00000 0.00000 0.00000
   5   3 -13  197.30   31.75   1 0.00000 0.00000 0.00000 0.00000 0.00000 0.00000
  -8   3  -2  375.33   21.54  -2 0.00000 0.00000 0.00000 0.00000 0.00000 0.00000
  -3  -3  13  375.33   21.54   1 0.00000 0.00000 0.00000 0.00000 0.00000 0.00000
   8  -3   2  281.21   17.01  -2 0.00000 0.00000 0.00000 0.00000 0.00000 0.00000
   3   3 -13  281.21   17.01   1 0.00000 0.00000 0.00000 0.00000 0.00000 0.00000
  -7   3  -5   -6.80    5.67  -2 0.00000 0.00000 0.00000 0.00000 0.00000 0.00000
  -1  -3  13   -6.80    5.67   1 0.00000 0.00000 0.00000 0.00000 0.00000 0.00000
   7  -3   5   -2.27   12.47  -2 0.00000 0.00000 0.00000 0.00000 0.00000 0.00000
   1   3 -13   -2.27   12.47   1 0.00000 0.00000 0.00000 0.00000 0.00000 0.00000
   6   3   8  306.16   14.74  -2 0.00000 0.00000 0.00000 0.00000 0.00000 0.00000
  -1  -3 -13  306.16   14.74   1 0.00000 0.00000 0.00000 0.00000 0.00000 0.00000
  -6  -3  -8  294.82   22.68  -2 0.00000 0.00000 0.00000 0.00000 0.00000 0.00000
   1   3  13  294.82   22.68   1 0.00000 0.00000 0.00000 0.00000 0.00000 0.00000
   5   3  11  412.74   17.01  -2 0.00000 0.00000 0.00000 0.00000 0.00000 0.00000
  -3  -3 -13  412.74   17.01   1 0.00000 0.00000 0.00000 0.00000 0.00000 0.00000
  -5  -3 -11  479.65   34.02  -2 0.00000 0.00000 0.00000 0.00000 0.00000 0.00000
   3   3  13  479.65   34.02   1 0.00000 0.00000 0.00000 0.00000 0.00000 0.00000
   5   3  12    3.40   11.34  -2 0.00000 0.00000 0.00000 0.00000 0.00000 0.00000
  -4  -3 -13    3.40   11.34   1 0.00000 0.00000 0.00000 0.00000 0.00000 0.00000
  -5  -3 -12   17.01   18.14  -2 0.00000 0.00000 0.00000 0.00000 0.00000 0.00000
   4   3  13   17.01   18.14   1 0.00000 0.00000 0.00000 0.00000 0.00000 0.00000
  -8   4  -2  219.98   27.21  -2 0.00000 0.00000 0.00000 0.00000 0.00000 0.00000
  -3  -4  13  219.98   27.21   1 0.00000 0.00000 0.00000 0.00000 0.00000 0.00000
   8  -4   2  212.04   21.54  -2 0.00000 0.00000 0.00000 0.00000 0.00000 0.00000
   3   4 -13  212.04   21.54   1 0.00000 0.00000 0.00000 0.00000 0.00000 0.00000
  -7   4  -5  759.72   27.21  -2 0.00000 0.00000 0.00000 0.00000 0.00000 0.00000
  -1  -4  13  759.72   27.21   1 0.00000 0.00000 0.00000 0.00000 0.00000 0.00000
   7  -4   5  744.98   40.82  -2 0.00000 0.00000 0.00000 0.00000 0.00000 0.00000
   1   4 -13  744.98   40.82   1 0.00000 0.00000 0.00000 0.00000 0.00000 0.00000
   6   4   8  312.96   13.61  -2 0.00000 0.00000 0.00000 0.00000 0.00000 0.00000
  -1  -4 -13  312.96   13.61   1 0.00000 0.00000 0.00000 0.00000 0.00000 0.00000
  -6  -4  -8  282.34   23.81  -2 0.00000 0.00000 0.00000 0.00000 0.00000 0.00000
   1   4  13  282.34   23.81   1 0.00000 0.00000 0.00000 0.00000 0.00000 0.00000
   5   4  11   62.37   11.34  -2 0.00000 0.00000 0.00000 0.00000 0.00000 0.00000
  -3  -4 -13   62.37   11.34   1 0.00000 0.00000 0.00000 0.00000 0.00000 0.00000
  -5  -4 -11   38.55   40.82  -2 0.00000 0.00000 0.00000 0.00000 0.00000 0.00000
   3   4  13   38.55   40.82   1 0.00000 0.00000 0.00000 0.00000 0.00000 0.00000
   9   0   1  275.54   17.01  -2 0.00000 0.00000 0.00000 0.00000 0.00000 0.00000
   4   0 -14  275.54   17.01   1 0.00000 0.00000 0.00000 0.00000 0.00000 0.00000
   8   0   4   99.78   10.21  -2 0.00000 0.00000 0.00000 0.00000 0.00000 0.00000
   2   0 -14   99.78   10.21   1 0.00000 0.00000 0.00000 0.00000 0.00000 0.00000
  -7   0  -7 1182.67   31.75  -2 0.00000 0.00000 0.00000 0.00000 0.00000 0.00000
   0   0  14 1182.67   31.75   1 0.00000 0.00000 0.00000 0.00000 0.00000 0.00000
  -6   0 -10  461.50   18.14  -2 0.00000 0.00000 0.00000 0.00000 0.00000 0.00000
   2   0  14  461.50   18.14   1 0.00000 0.00000 0.00000 0.00000 0.00000 0.00000
  -5   0 -13   57.83   18.14  -2 0.00000 0.00000 0.00000 0.00000 0.00000 0.00000
   4   0  14   57.83   18.14   1 0.00000 0.00000 0.00000 0.00000 0.00000 0.00000
  -9   1  -1  426.35   20.41  -2 0.00000 0.00000 0.00000 0.00000 0.00000 0.00000
  -4  -1  14  426.35   20.41   1 0.00000 0.00000 0.00000 0.00000 0.00000 0.00000
   9  -1   1  436.56   19.28  -2 0.00000 0.00000 0.00000 0.00000 0.00000 0.00000
   4   1 -14  436.56   19.28   1 0.00000 0.00000 0.00000 0.00000 0.00000 0.00000
  -8   1  -4  680.35   20.41  -2 0.00000 0.00000 0.00000 0.00000 0.00000 0.00000
  -2  -1  14  680.35   20.41   1 0.00000 0.00000 0.00000 0.00000 0.00000 0.00000
   8  -1   4  602.11   20.41  -2 0.00000 0.00000 0.00000 0.00000 0.00000 0.00000
   2   1 -14  602.11   20.41   1 0.00000 0.00000 0.00000 0.00000 0.00000 0.00000
   7   1   7   73.70   11.34  -2 0.00000 0.00000 0.00000 0.00000 0.00000 0.00000
   0  -1 -14   73.70   11.34   1 0.00000 0.00000 0.00000 0.00000 0.00000 0.00000
  -7  -1  -7   73.70   13.61  -2 0.00000 0.00000 0.00000 0.00000 0.00000 0.00000
   0   1  14   73.70   13.61   1 0.00000 0.00000 0.00000 0.00000 0.00000 0.00000
   6   1  10   97.52   10.21  -2 0.00000 0.00000 0.00000 0.00000 0.00000 0.00000
  -2  -1 -14   97.52   10.21   1 0.00000 0.00000 0.00000 0.00000 0.00000 0.00000
  -6  -1 -10   80.51    9.07  -2 0.00000 0.00000 0.00000 0.00000 0.00000 0.00000
   2   1  14   80.51    9.07   1 0.00000 0.00000 0.00000 0.00000 0.00000 0.00000
   5   1  13  280.08   20.41  -2 0.00000 0.00000 0.00000 0.00000 0.00000 0.00000
  -4  -1 -14  280.08   20.41   1 0.00000 0.00000 0.00000 0.00000 0.00000 0.00000
  -5  -1 -13  277.81   28.35  -2 0.00000 0.00000 0.00000 0.00000 0.00000 0.00000
   4   1  14  277.81   28.35   1 0.00000 0.00000 0.00000 0.00000 0.00000 0.00000
  -9   2  -1  183.69   18.14  -2 0.00000 0.00000 0.00000 0.00000 0.00000 0.00000
  -4  -2  14  183.69   18.14   1 0.00000 0.00000 0.00000 0.00000 0.00000 0.00000
   9  -2   1  145.14   21.54  -2 0.00000 0.00000 0.00000 0.00000 0.00000 0.00000
   4   2 -14  145.14   21.54   1 0.00000 0.00000 0.00000 0.00000 0.00000 0.00000
  -8   2  -4    1.13    9.07  -2 0.00000 0.00000 0.00000 0.00000 0.00000 0.00000
  -2  -2  14    1.13    9.07   1 0.00000 0.00000 0.00000 0.00000 0.00000 0.00000
   8  -2   4   11.34   12.47  -2 0.00000 0.00000 0.00000 0.00000 0.00000 0.00000
   2   2 -14   11.34   12.47   1 0.00000 0.00000 0.00000 0.00000 0.00000 0.00000
   7   2   7  416.15   17.01  -2 0.00000 0.00000 0.00000 0.00000 0.00000 0.00000
   0  -2 -14  416.15   17.01   1 0.00000 0.00000 0.00000 0.00000 0.00000 0.00000
  -7  -2  -7  343.58   20.41  -2 0.00000 0.00000 0.00000 0.00000 0.00000 0.00000
   0   2  14  343.58   20.41   1 0.00000 0.00000 0.00000 0.00000 0.00000 0.00000
   6   2  10  452.43   19.28  -2 0.00000 0.00000 0.00000 0.00000 0.00000 0.00000
  -2  -2 -14  452.43   19.28   1 0.00000 0.00000 0.00000 0.00000 0.00000 0.00000
  -6  -2 -10  394.60   35.15  -2 0.00000 0.00000 0.00000 0.00000 0.00000 0.00000
   2   2  14  394.60   35.15   1 0.00000 0.00000 0.00000 0.00000 0.00000 0.00000
   6   2  11   36.29   11.34  -2 0.00000 0.00000 0.00000 0.00000 0.00000 0.00000
  -3  -2 -14   36.29   11.34   1 0.00000 0.00000 0.00000 0.00000 0.00000 0.00000
  -6  -2 -11   51.03   17.01  -2 0.00000 0.00000 0.00000 0.00000 0.00000 0.00000
   3   2  14   51.03   17.01   1 0.00000 0.00000 0.00000 0.00000 0.00000 0.00000
   5   2  13   31.75   14.74  -2 0.00000 0.00000 0.00000 0.00000 0.00000 0.00000
  -4  -2 -14   31.75   14.74   1 0.00000 0.00000 0.00000 0.00000 0.00000 0.00000
  -5  -2 -13   43.09   18.14  -2 0.00000 0.00000 0.00000 0.00000 0.00000 0.00000
   4   2  14   43.09   18.14   1 0.00000 0.00000 0.00000 0.00000 0.00000 0.00000
  -9   3  -1   22.68   22.68  -2 0.00000 0.00000 0.00000 0.00000 0.00000 0.00000
  -4  -3  14   22.68   22.68   1 0.00000 0.00000 0.00000 0.00000 0.00000 0.00000
   9  -3   1   -4.54   20.41  -2 0.00000 0.00000 0.00000 0.00000 0.00000 0.00000
   4   3 -14   -4.54   20.41   1 0.00000 0.00000 0.00000 0.00000 0.00000 0.00000
  -8   3  -4  195.03   15.87  -2 0.00000 0.00000 0.00000 0.00000 0.00000 0.00000
  -2  -3  14  195.03   15.87   1 0.00000 0.00000 0.00000 0.00000 0.00000 0.00000
   8  -3   4  147.41   15.87  -2 0.00000 0.00000 0.00000 0.00000 0.00000 0.00000
   2   3 -14  147.41   15.87   1 0.00000 0.00000 0.00000 0.00000 0.00000 0.00000
   7   3   7  290.28   17.01  -2 0.00000 0.00000 0.00000 0.00000 0.00000 0.00000
   0  -3 -14  290.28   17.01   1 0.00000 0.00000 0.00000 0.00000 0.00000 0.00000
  -7  -3  -7  266.47   24.95  -2 0.00000 0.00000 0.00000 0.00000 0.00000 0.00000
   0   3  14  266.47   24.95   1 0.00000 0.00000 0.00000 0.00000 0.00000 0.00000
   6   3  10   80.51   13.61  -2 0.00000 0.00000 0.00000 0.00000 0.00000 0.00000
  -2  -3 -14   80.51   13.61   1 0.00000 0.00000 0.00000 0.00000 0.00000 0.00000
  -6  -3 -10   87.31   17.01  -2 0.00000 0.00000 0.00000 0.00000 0.00000 0.00000
   2   3  14   87.31   17.01   1 0.00000 0.00000 0.00000 0.00000 0.00000 0.00000
   6   3  11   82.78   12.47  -2 0.00000 0.00000 0.00000 0.00000 0.00000 0.00000
  -3  -3 -14   82.78   12.47   1 0.00000 0.00000 0.00000 0.00000 0.00000 0.00000
  -6  -3 -11  134.94   21.54  -2 0.00000 0.00000 0.00000 0.00000 0.00000 0.00000
   3   3  14  134.94   21.54   1 0.00000 0.00000 0.00000 0.00000 0.00000 0.00000
  -8   4  -4  223.38   44.22  -2 0.00000 0.00000 0.00000 0.00000 0.00000 0.00000
  -2  -4  14  223.38   44.22   1 0.00000 0.00000 0.00000 0.00000 0.00000 0.00000
   8  -4   4  128.13   38.55  -2 0.00000 0.00000 0.00000 0.00000 0.00000 0.00000
   2   4 -14  128.13   38.55   1 0.00000 0.00000 0.00000 0.00000 0.00000 0.00000
   7   4   7   -6.80   17.01  -2 0.00000 0.00000 0.00000 0.00000 0.00000 0.00000
   0  -4 -14   -6.80   17.01   1 0.00000 0.00000 0.00000 0.00000 0.00000 0.00000
  -7  -4  -7   23.81   43.09  -2 0.00000 0.00000 0.00000 0.00000 0.00000 0.00000
   0   4  14   23.81   43.09   1 0.00000 0.00000 0.00000 0.00000 0.00000 0.00000
   9   0   3  259.67   13.61  -2 0.00000 0.00000 0.00000 0.00000 0.00000 0.00000
   3   0 -15  259.67   13.61   1 0.00000 0.00000 0.00000 0.00000 0.00000 0.00000
   8   0   6  832.29   27.21  -2 0.00000 0.00000 0.00000 0.00000 0.00000 0.00000
   1   0 -15  832.29   27.21   1 0.00000 0.00000 0.00000 0.00000 0.00000 0.00000
  -7   0  -9  103.19   18.14  -2 0.00000 0.00000 0.00000 0.00000 0.00000 0.00000
   1   0  15  103.19   18.14   1 0.00000 0.00000 0.00000 0.00000 0.00000 0.00000
  -6   0 -12  246.06   26.08  -2 0.00000 0.00000 0.00000 0.00000 0.00000 0.00000
   3   0  15  246.06   26.08   1 0.00000 0.00000 0.00000 0.00000 0.00000 0.00000
  -9   1  -3   73.70   10.21  -2 0.00000 0.00000 0.00000 0.00000 0.00000 0.00000
  -3  -1  15   73.70   10.21   1 0.00000 0.00000 0.00000 0.00000 0.00000 0.00000
   9  -1   3   65.77   12.47  -2 0.00000 0.00000 0.00000 0.00000 0.00000 0.00000
   3   1 -15   65.77   12.47   1 0.00000 0.00000 0.00000 0.00000 0.00000 0.00000
  -8   1  -6   37.42   11.34  -2 0.00000 0.00000 0.00000 0.00000 0.00000 0.00000
  -1  -1  15   37.42   11.34   1 0.00000 0.00000 0.00000 0.00000 0.00000 0.00000
   8  -1   6   58.96   13.61  -2 0.00000 0.00000 0.00000 0.00000 0.00000 0.00000
   1   1 -15   58.96   13.61   1 0.00000 0.00000 0.00000 0.00000 0.00000 0.00000
   7   1   9  555.62   27.21  -2 0.00000 0.00000 0.00000 0.00000 0.00000 0.00000
  -1  -1 -15  555.62   27.21   1 0.00000 0.00000 0.00000 0.00000 0.00000 0.00000
  -7  -1  -9  583.97   38.55  -2 0.00000 0.00000 0.00000 0.00000 0.00000 0.00000
   1   1  15  583.97   38.55   1 0.00000 0.00000 0.00000 0.00000 0.00000 0.00000
   7   1  10   70.30   13.61  -2 0.00000 0.00000 0.00000 0.00000 0.00000 0.00000
  -2  -1 -15   70.30   13.61   1 0.00000 0.00000 0.00000 0.00000 0.00000 0.00000
  -7  -1 -10   30.62   41.95  -2 0.00000 0.00000 0.00000 0.00000 0.00000 0.00000
   2   1  15   30.62   41.95   1 0.00000 0.00000 0.00000 0.00000 0.00000 0.00000
   6   1  12  505.73   27.21  -2 0.00000 0.00000 0.00000 0.00000 0.00000 0.00000
  -3  -1 -15  505.73   27.21   1 0.00000 0.00000 0.00000 0.00000 0.00000 0.00000
  -6  -1 -12  504.59   36.29  -2 0.00000 0.00000 0.00000 0.00000 0.00000 0.00000
   3   1  15  504.59   36.29   1 0.00000 0.00000 0.00000 0.00000 0.00000 0.00000
  -9   2  -3  158.75   15.87  -2 0.00000 0.00000 0.00000 0.00000 0.00000 0.00000
  -3  -2  15  158.75   15.87   1 0.00000 0.00000 0.00000 0.00000 0.00000 0.00000
   9  -2   3  115.66   15.87  -2 0.00000 0.00000 0.00000 0.00000 0.00000 0.00000
   3   2 -15  115.66   15.87   1 0.00000 0.00000 0.00000 0.00000 0.00000 0.00000
  -8   2  -6  273.27   15.87  -2 0.00000 0.00000 0.00000 0.00000 0.00000 0.00000
  -1  -2  15  273.27   15.87   1 0.00000 0.00000 0.00000 0.00000 0.00000 0.00000
   8  -2   6  182.56   20.41  -2 0.00000 0.00000 0.00000 0.00000 0.00000 0.00000
   1   2 -15  182.56   20.41   1 0.00000 0.00000 0.00000 0.00000 0.00000 0.00000
   7   2   9   13.61   14.74  -2 0.00000 0.00000 0.00000 0.00000 0.00000 0.00000
  -1  -2 -15   13.61   14.74   1 0.00000 0.00000 0.00000 0.00000 0.00000 0.00000
  -7  -2  -9   17.01   40.82  -2 0.00000 0.00000 0.00000 0.00000 0.00000 0.00000
   1   2  15   17.01   40.82   1 0.00000 0.00000 0.00000 0.00000 0.00000 0.00000
   7   2  10  -12.47   10.21  -2 0.00000 0.00000 0.00000 0.00000 0.00000 0.00000
  -2  -2 -15  -12.47   10.21   1 0.00000 0.00000 0.00000 0.00000 0.00000 0.00000
  -7  -2 -10   18.14   28.35  -2 0.00000 0.00000 0.00000 0.00000 0.00000 0.00000
   2   2  15   18.14   28.35   1 0.00000 0.00000 0.00000 0.00000 0.00000 0.00000
   6   2  12   80.51   21.54  -2 0.00000 0.00000 0.00000 0.00000 0.00000 0.00000
  -3  -2 -15   80.51   21.54   1 0.00000 0.00000 0.00000 0.00000 0.00000 0.00000
  -6  -2 -12   89.58   20.41  -2 0.00000 0.00000 0.00000 0.00000 0.00000 0.00000
   3   2  15   89.58   20.41   1 0.00000 0.00000 0.00000 0.00000 0.00000 0.00000
  -8   3  -6   70.30   15.87  -2 0.00000 0.00000 0.00000 0.00000 0.00000 0.00000
  -1  -3  15   70.30   15.87   1 0.00000 0.00000 0.00000 0.00000 0.00000 0.00000
   8  -3   6   44.22   22.68  -2 0.00000 0.00000 0.00000 0.00000 0.00000 0.00000
   1   3 -15   44.22   22.68   1 0.00000 0.00000 0.00000 0.00000 0.00000 0.00000
   7   3   9   71.44   12.47  -2 0.00000 0.00000 0.00000 0.00000 0.00000 0.00000
  -1  -3 -15   71.44   12.47   1 0.00000 0.00000 0.00000 0.00000 0.00000 0.00000
  -7  -3  -9   85.04   43.09  -2 0.00000 0.00000 0.00000 0.00000 0.00000 0.00000
   1   3  15   85.04   43.09   1 0.00000 0.00000 0.00000 0.00000 0.00000 0.00000
   9   0   5   -1.13   18.14  -2 0.00000 0.00000 0.00000 0.00000 0.00000 0.00000
   2   0 -16   -1.13   18.14   1 0.00000 0.00000 0.00000 0.00000 0.00000 0.00000
  -8   0  -8   -4.54   10.21  -2 0.00000 0.00000 0.00000 0.00000 0.00000 0.00000
   0   0  16   -4.54   10.21   1 0.00000 0.00000 0.00000 0.00000 0.00000 0.00000
  -7   0 -11    9.07   43.09  -2 0.00000 0.00000 0.00000 0.00000 0.00000 0.00000
   2   0  16    9.07   43.09   1 0.00000 0.00000 0.00000 0.00000 0.00000 0.00000
  -9   1  -5   14.74   12.47  -2 0.00000 0.00000 0.00000 0.00000 0.00000 0.00000
  -2  -1  16   14.74   12.47   1 0.00000 0.00000 0.00000 0.00000 0.00000 0.00000
   9  -1   5    9.07   15.87  -2 0.00000 0.00000 0.00000 0.00000 0.00000 0.00000
   2   1 -16    9.07   15.87   1 0.00000 0.00000 0.00000 0.00000 0.00000 0.00000
   8   1   8   23.81   12.47  -2 0.00000 0.00000 0.00000 0.00000 0.00000 0.00000
   0  -1 -16   23.81   12.47   1 0.00000 0.00000 0.00000 0.00000 0.00000 0.00000
  -8  -1  -8   63.50   41.95  -2 0.00000 0.00000 0.00000 0.00000 0.00000 0.00000
   0   1  16   63.50   41.95   1 0.00000 0.00000 0.00000 0.00000 0.00000 0.00000
   8   1   9   31.75   15.87  -2 0.00000 0.00000 0.00000 0.00000 0.00000 0.00000
  -1  -1 -16   31.75   15.87   1 0.00000 0.00000 0.00000 0.00000 0.00000 0.00000
  -8  -1  -9  -24.95   38.55  -2 0.00000 0.00000 0.00000 0.00000 0.00000 0.00000
   1   1  16  -24.95   38.55   1 0.00000 0.00000 0.00000 0.00000 0.00000 0.00000
   8   2   8  119.06   44.22  -2 0.00000 0.00000 0.00000 0.00000 0.00000 0.00000
   0  -2 -16  119.06   44.22   1 0.00000 0.00000 0.00000 0.00000 0.00000 0.00000
  -8  -2  -8   82.78   45.36  -2 0.00000 0.00000 0.00000 0.00000 0.00000 0.00000
   0   2  16   82.78   45.36   1 0.00000 0.00000 0.00000 0.00000 0.00000 0.00000
;
_shelx_hkl_checksum   90108
